# Supplementary material
Source: publisher figshare collection journal article supplement (https://acs.figshare.com/ndownloader/files/22057788)

## **Supporting Information**

for

### **Visibly Emitting Thiazolyl-uridine Analogues as promising fluorescent probes**

Jinsi Li, Xuerong Fang, Xin Ming \*

Department of Pharmacy, Chengdu Medical College, No. 783 Xindu Avenue, Chengdu,

Sichuan, 610500, P. R. China. \*E-mail: mingxin@cmc.edu.cn

## Table of Contents

|                                                                                                     |    |
|-----------------------------------------------------------------------------------------------------|----|
| Sensitivity to polarity.....                                                                        | 2  |
| LC chromatograms of compound <b>7b</b> , <b>7c</b> , <b>7e</b> and <b>7l</b> at pH 1, 7 and 13..... | 16 |
| Sensitivity to pH .....                                                                             | 34 |
| LC-ESI-MS chromatograms and NMR spectra of new and known compounds.....                             | 46 |

## Fluorescence date

### Sensitivity to polarity

| compound                                                                                        | solvent  | $\lambda_{\text{abs}}$ | $\lambda_{\text{em}}$ | Stokes shift | $\phi$ |
|-------------------------------------------------------------------------------------------------|----------|------------------------|-----------------------|--------------|--------|
| 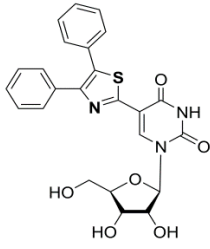<br><b>7a</b> | Dioxane  | 350                    | 442                   | 5946 (92)    | 0.026  |
|                                                                                                 | DMSO     | 348                    | 446                   | 6314 (98)    | 0.026  |
|                                                                                                 | Ethanol  | 345                    | 447                   | 6614 (102)   | 0.032  |
|                                                                                                 | Methanol | 345                    | 452                   | 6862 (107)   | 0.031  |
|                                                                                                 | Water    | 345                    | 472                   | 7572 (127)   | 0.073  |

**Table S1.** Absorbance and emission maxima of **7a** in dioxane, DMSO, ethanol, methanol and water.  $\lambda_{\text{abs}}$ ,  $\lambda_{\text{em}}$  and Stokes shift are reported in nm, nm and  $\text{cm}^{-1}$  (nm). Quantum yield values were measured at  $\lambda_{\text{abs}} = 360$  nm using quinine sulfate in 0.5 M  $\text{H}_2\text{SO}_4$  ( $\Phi_{\text{fl}} = 0.55$ ) as the standard.

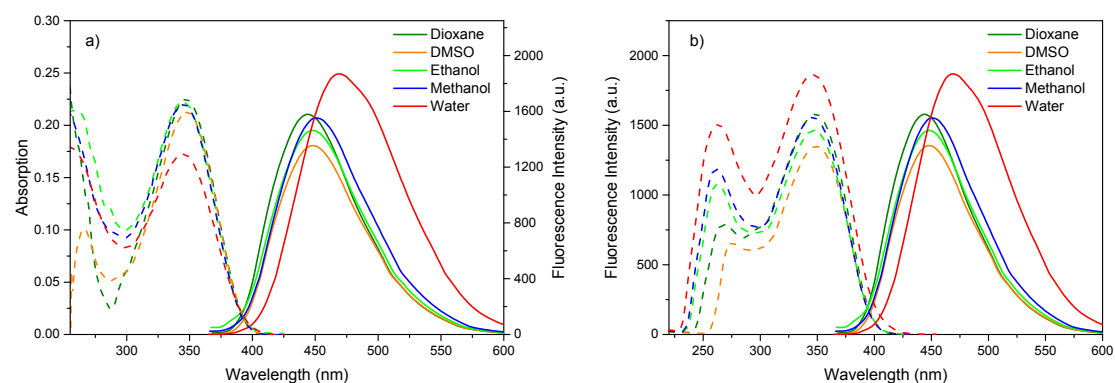

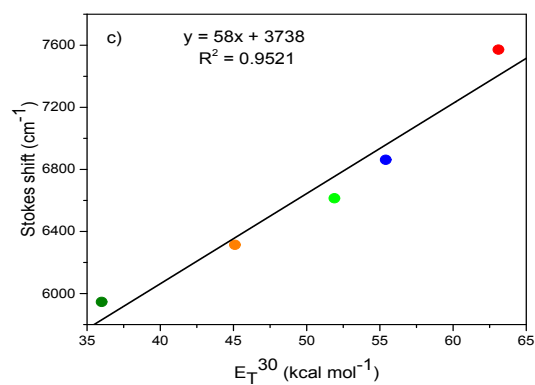

**Figure S1.** (a) Absorbance (10.0  $\mu$ M, dash) and emission (5.0  $\mu$ M, solid) spectra of **7a** in various solvents. (b) Excitation (dash line) and emission (solid line) spectra of **7a** in various solvents. (c) Linear relationship between stokes shift and solvent polarity of **7a** in various solvents.

| compound                                                                                       | solvent  | $\lambda_{\text{abs}}$ | $\lambda_{\text{em}}$ | Stokes shift | $\phi$ |
|------------------------------------------------------------------------------------------------|----------|------------------------|-----------------------|--------------|--------|
| 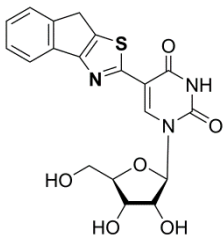<br><b>7b</b> | Dioxane  | 359                    | 439                   | 5076 (80)    | 0.165  |
|                                                                                                | DMSO     | 359                    | 449                   | 5583 (90)    | 0.198  |
|                                                                                                | Ethanol  | 356                    | 451                   | 5917 (95)    | 0.260  |
|                                                                                                | Methanol | 355                    | 460                   | 6430 (105)   | 0.317  |
|                                                                                                | Water    | 355                    | 484                   | 7550 (129)   | 0.117  |

**Table S2.** Absorbance and emission maxima of **7b** in dioxane, DMSO, ethanol, methanol and water.  $\lambda_{\text{abs}}$ ,  $\lambda_{\text{em}}$  and Stokes shift are reported in nm, nm and  $\text{cm}^{-1}$  (nm). Quantum yield values were measured at  $\lambda_{\text{abs}} = 360$  nm using quinine sulfate in 0.5 M  $\text{H}_2\text{SO}_4$  ( $\Phi_{\text{fl}} = 0.55$ ) as the standard.

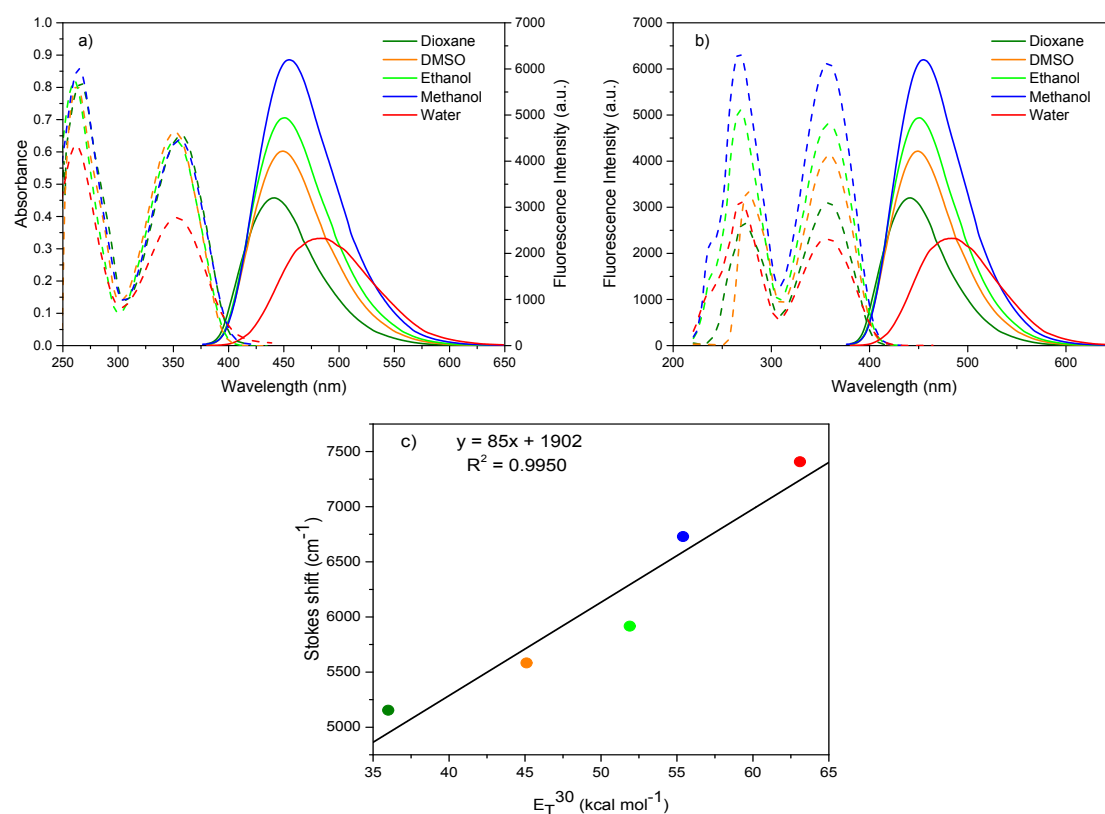

**Figure S2.** (a) Absorbance (30.0  $\mu\text{M}$ , dash) and emission (5.0  $\mu\text{M}$ , solid) spectra of **7b** in various solvents. (b) Excitation (dash line) and emission (solid line) spectra of **7b** in various solvents. (c) Linear relationship between stokes shift and solvent polarity of **7b** in various solvents.

| compound                                                                                       | solvent  | $\lambda_{\text{abs}}$ | $\lambda_{\text{em}}$ | Stokes shift | $\phi$ |
|------------------------------------------------------------------------------------------------|----------|------------------------|-----------------------|--------------|--------|
| 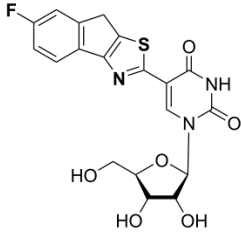<br><b>7c</b> | Dioxane  | 363                    | 442                   | 4924 (79)    | 0.123  |
|                                                                                                | DMSO     | 359                    | 449                   | 5583 (90)    | 0.278  |
|                                                                                                | Ethanol  | 358                    | 452                   | 5809 (94)    | 0.266  |
|                                                                                                | Methanol | 358                    | 456                   | 6003 (98)    | 0.294  |
|                                                                                                | Water    | 359                    | 489                   | 7405 (130)   | 0.072  |

**Table S3.** Absorbance and emission maxima of **7c** in dioxane, DMSO, ethanol, methanol and water.  $\lambda_{\text{abs}}$ ,  $\lambda_{\text{em}}$  and Stokes shift are reported in nm, nm and  $\text{cm}^{-1}$  (nm). Quantum yield values were measured at  $\lambda_{\text{abs}} = 360$  nm using quinine sulfate in 0.5 M  $\text{H}_2\text{SO}_4$  ( $\Phi_{\text{fl}} = 0.55$ ) as the standard.

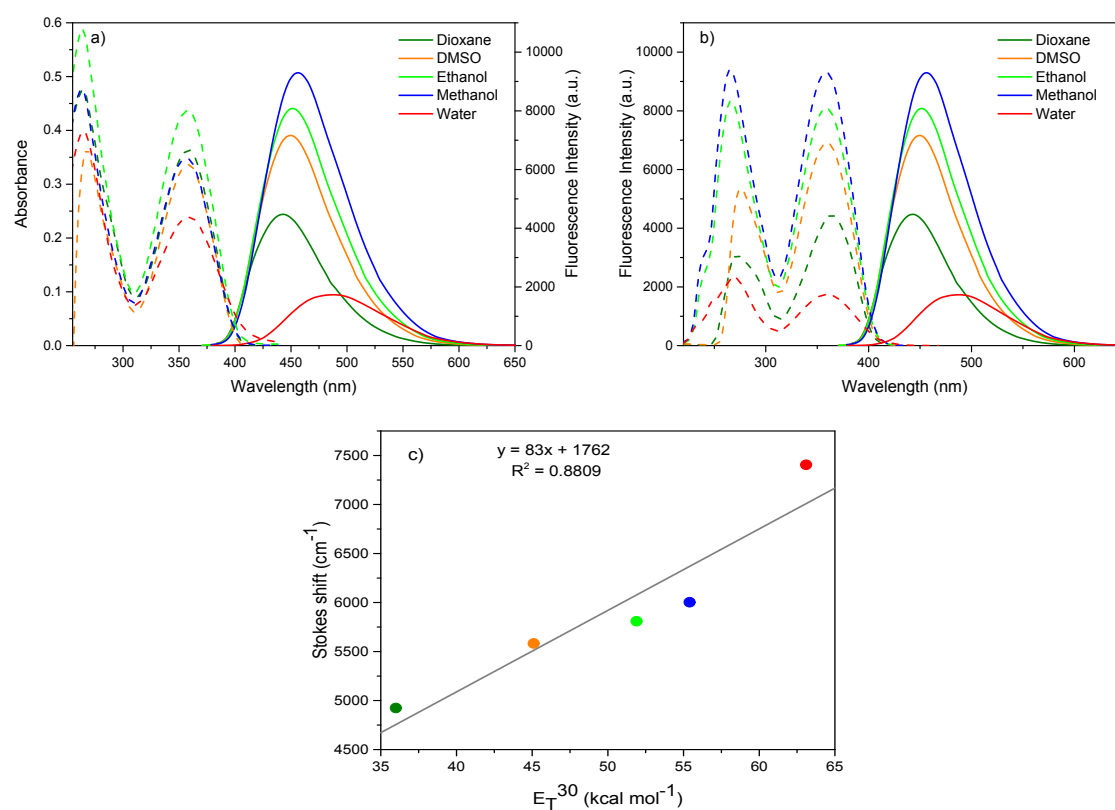

**Figure S3.** (a) Absorbance (30.0  $\mu\text{M}$ , dash) and emission (10.0  $\mu\text{M}$ , solid) spectra of **7c** in various solvents. (b) Excitation (dash line) and emission (solid line) spectra of **7c** in various solvents. (c) Linear relationship between stokes shift and solvent polarity of **7c** in various solvents.

| compound                                                                                       | solvent  | $\lambda_{\text{abs}}$ | $\lambda_{\text{em}}$ | Stokes shift | $\phi$ |
|------------------------------------------------------------------------------------------------|----------|------------------------|-----------------------|--------------|--------|
| 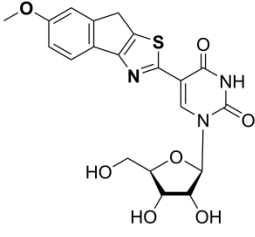<br><b>7d</b> | Dioxane  | 373                    | 464                   | 5257 (91)    | 0.331  |
|                                                                                                | DMSO     | 373                    | 490                   | 6401 (117)   | 0.315  |
|                                                                                                | Ethanol  | 372                    | 495                   | 6679 (123)   | 0.086  |
|                                                                                                | Methanol | 370                    | 502                   | 7107 (132)   | 0.044  |
|                                                                                                | Water    | 371                    | 507                   | 7230 (136)   | 0.014  |

**Table S4.** Absorbance and emission maxima of **7d** in dioxane, DMSO, ethanol, methanol and water.  $\lambda_{\text{abs}}$ ,  $\lambda_{\text{em}}$  and Stokes shift are reported in nm, nm and  $\text{cm}^{-1}$  (nm). Quantum yield values were measured at  $\lambda_{\text{abs}} = 360$  nm using quinine sulfate in 0.5 M  $\text{H}_2\text{SO}_4$  ( $\Phi_{\text{fl}} = 0.55$ ) as the standard.

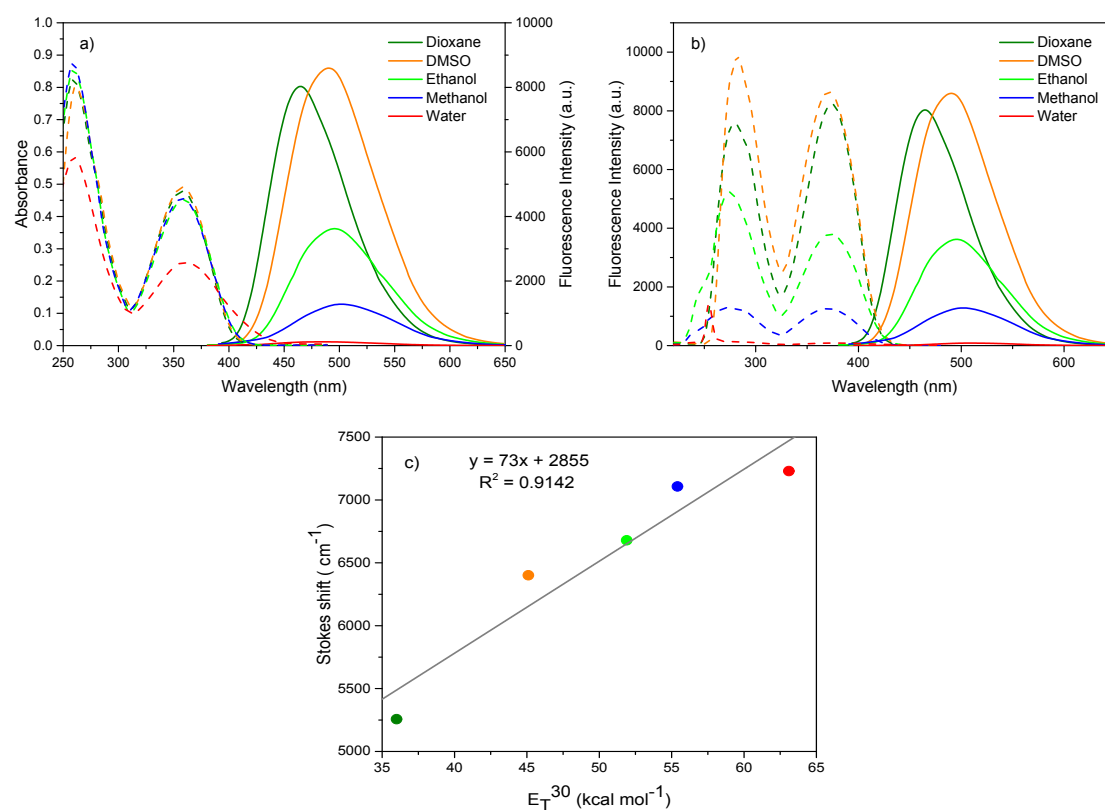

**Figure S4.** (a) Absorbance (30.0  $\mu\text{M}$ , dash) and emission (10.0  $\mu\text{M}$ , solid) spectra of **7d** in various solvents. (b) Excitation (dash line) and emission (solid line) spectra of **7d** in various solvents. (c) Linear relationship between stokes shift and solvent polarity of **7d** in various solvents.

| compound                                                                                       | solvent  | $\lambda_{\text{abs}}$ | $\lambda_{\text{em}}$ | Stokes shift | $\phi$ |
|------------------------------------------------------------------------------------------------|----------|------------------------|-----------------------|--------------|--------|
| 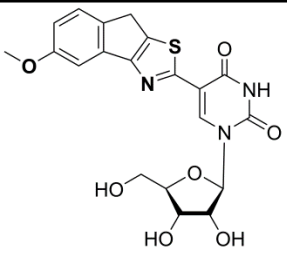<br><b>7e</b> | Dioxane  | 355                    | 442                   | 5544 (87)    | 0.082  |
|                                                                                                | DMSO     | 360                    | 455                   | 5800 (95)    | 0.153  |
|                                                                                                | Ethanol  | 360                    | 461                   | 6085 (101)   | 0.168  |
|                                                                                                | Methanol | 358                    | 468                   | 6565 (110)   | 0.153  |
|                                                                                                | Water    | 360                    | 499                   | 7737(139)    | 0.014  |

**Table S5.** Absorbance and emission maxima of **7e** in dioxane, DMSO, ethanol, methanol and water.  $\lambda_{\text{abs}}$ ,  $\lambda_{\text{em}}$  and Stokes shift are reported in nm, nm and  $\text{cm}^{-1}$ . Quantum yield values were measured at  $\lambda_{\text{abs}} = 360$  nm using quinine sulfate in 0.5 M  $\text{H}_2\text{SO}_4$  ( $\Phi_{\text{fl}} = 0.55$ ) as the standard.

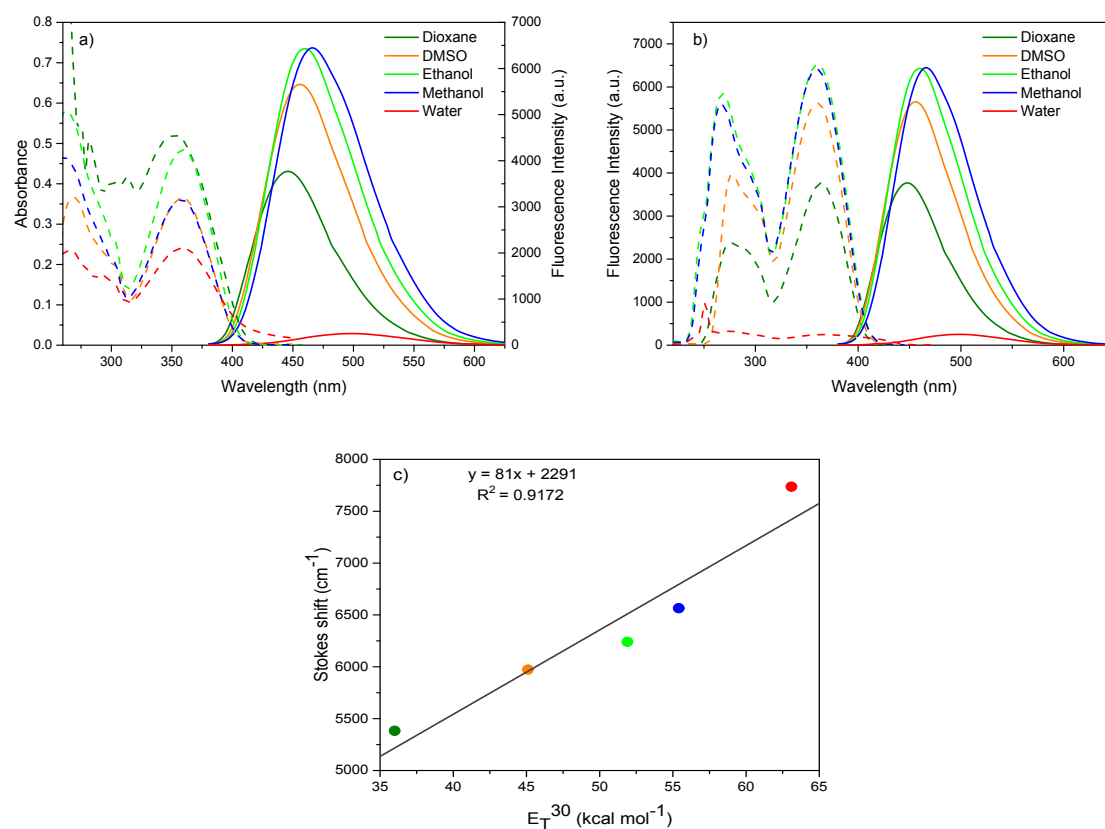

**Figure S5.** (a) Absorbance (30.0  $\mu\text{M}$ , dash) and emission (10.0  $\mu\text{M}$ , solid) spectra of **7e** in various solvents. (b) Excitation (dash line) and emission (solid line) spectra of **7e** in various solvents. (c) Linear relationship between stokes shift and solvent polarity of **7e** in various solvents.

| compound                                                                                       | solvent  | $\lambda_{\text{abs}}$ | $\lambda_{\text{em}}$ | Stokes shift | $\phi$ |
|------------------------------------------------------------------------------------------------|----------|------------------------|-----------------------|--------------|--------|
| 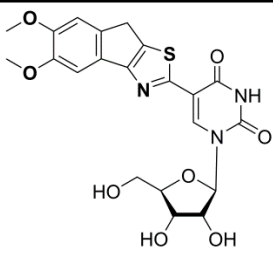<br><b>7f</b> | Dioxane  | 373                    | 493                   | 6526 (120)   | 0.267  |
|                                                                                                | DMSO     | 373                    | 518                   | 7505 (145)   | 0.030  |
|                                                                                                | Ethanol  | 373                    | 520                   | 7579 (147)   | 0.001  |
|                                                                                                | Methanol | 371                    | 530                   | 8080 (159)   | 0.001  |
|                                                                                                | Water    | 370                    | 539                   | 8508 (169)   | <0.001 |

**Table S6.** Absorbance and emission maxima of **7f** in dioxane, DMSO, ethanol, methanol and water.  $\lambda_{\text{abs}}$ ,  $\lambda_{\text{em}}$  and Stokes shift are reported in nm, nm and  $\text{cm}^{-1}$  (nm). Quantum yield values were measured at  $\lambda_{\text{abs}} = 360$  nm using quinine sulfate in 0.5 M  $\text{H}_2\text{SO}_4$  ( $\Phi_{\text{fl}} = 0.55$ ) as the standard.

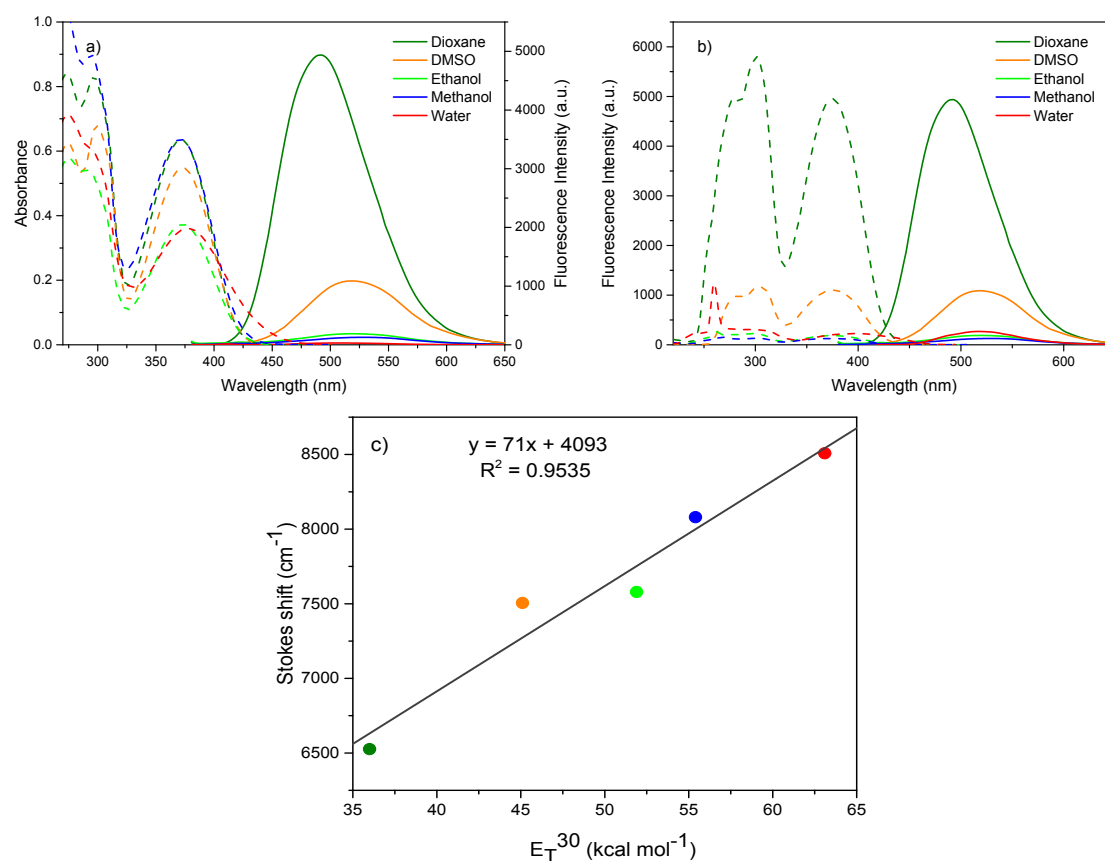

**Figure S6.** (a) Absorbance (50.0  $\mu\text{M}$ , dash) and emission (10.0  $\mu\text{M}$ , solid) spectra of **7f** in various solvents. (b) Excitation (dash line) and emission (solid line) spectra of **7f** in various solvents. (c) Linear relationship between stokes shift and solvent polarity of **7f** in various solvents.



| compound                                                                                       | solvent  | $\lambda_{\text{abs}}$ | $\lambda_{\text{em}}$ | Stokes shift | $\phi$ |
|------------------------------------------------------------------------------------------------|----------|------------------------|-----------------------|--------------|--------|
| 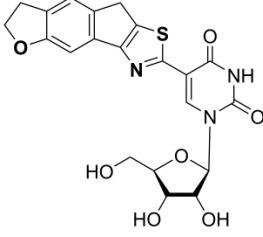<br><b>7g</b> | Dioxane  | 365                    | 455                   | 5419 (90)    | 0.097  |
|                                                                                                | DMSO     | 363                    | 473                   | 6017 (110)   | 0.150  |
|                                                                                                | Ethanol  | 365                    | 486                   | 6821 (121)   | 0.064  |
|                                                                                                | Methanol | 364                    | 491                   | 7106 (127)   | 0.019  |
|                                                                                                | Water    | 374                    | 508                   | 7787 (134)   | 0.002  |

**Table S7.** Absorbance and emission maxima of **7g** in dioxane, DMSO, ethanol, methanol and water.  $\lambda_{\text{abs}}$ ,  $\lambda_{\text{em}}$  and Stokes shift are reported in nm, nm and  $\text{cm}^{-1}$  (nm). Quantum yield values were measured at  $\lambda_{\text{abs}} = 360$  nm using quinine sulfate in 0.5 M  $\text{H}_2\text{SO}_4$  ( $\Phi_{\text{fl}} = 0.55$ ) as the standard.

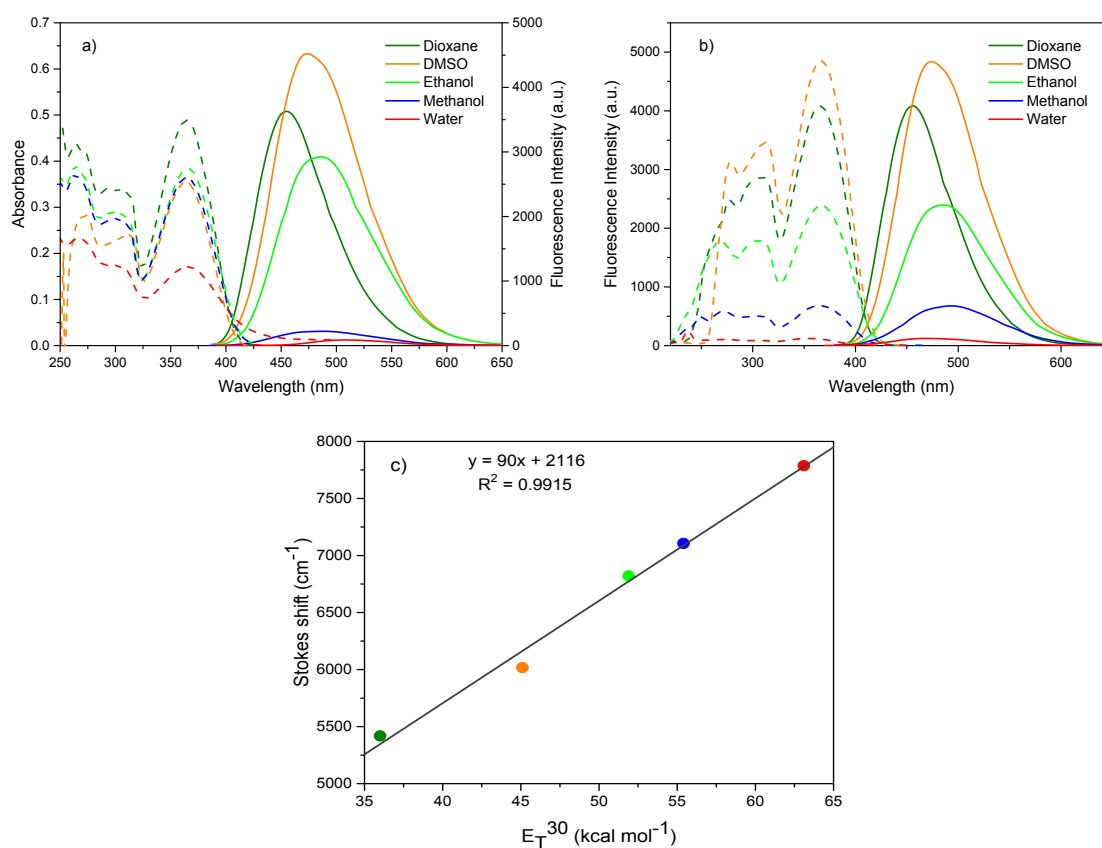

**Figure S7.** (a) Absorbance (30.0  $\mu\text{M}$ , dash) and emission (10.0  $\mu\text{M}$ , solid) spectra of **7g** in various solvents. (b) Excitation (dash line) and emission (solid line) spectra of **7g** in various solvents. (c) Linear relationship between stokes shift and solvent polarity of **7g** in various solvents.

| compound                                                                                       | solvent  | $\lambda_{\text{abs}}$ | $\lambda_{\text{em}}$ | Stokes shift | $\phi$ |
|------------------------------------------------------------------------------------------------|----------|------------------------|-----------------------|--------------|--------|
| 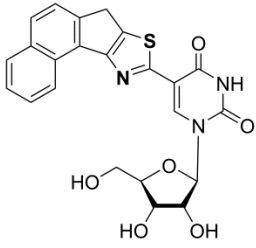<br><b>7h</b> | Dioxane  | 372                    | 461                   | 5190 (89)    | 0.071  |
|                                                                                                | DMSO     | 375                    | 472                   | 5480 (97)    | 0.037  |
|                                                                                                | Ethanol  | 370                    | 484                   | 6366 (114)   | 0.037  |
|                                                                                                | Methanol | 370                    | 495                   | 6825 (125)   | 0.033  |
|                                                                                                | Water    | 412                    | 522                   | 5115 (110)   | 0.003  |

**Table S8.** Absorbance and emission maxima of **7h** in dioxane, DMSO, ethanol, methanol and water.  $\lambda_{\text{abs}}$ ,  $\lambda_{\text{em}}$  and Stokes shift are reported in nm, nm and  $\text{cm}^{-1}$  (nm). Quantum yield values were measured at  $\lambda_{\text{abs}} = 360$  nm using quinine sulfate in 0.5 M  $\text{H}_2\text{SO}_4$  ( $\Phi_{\text{fl}} = 0.55$ ) as the standard.

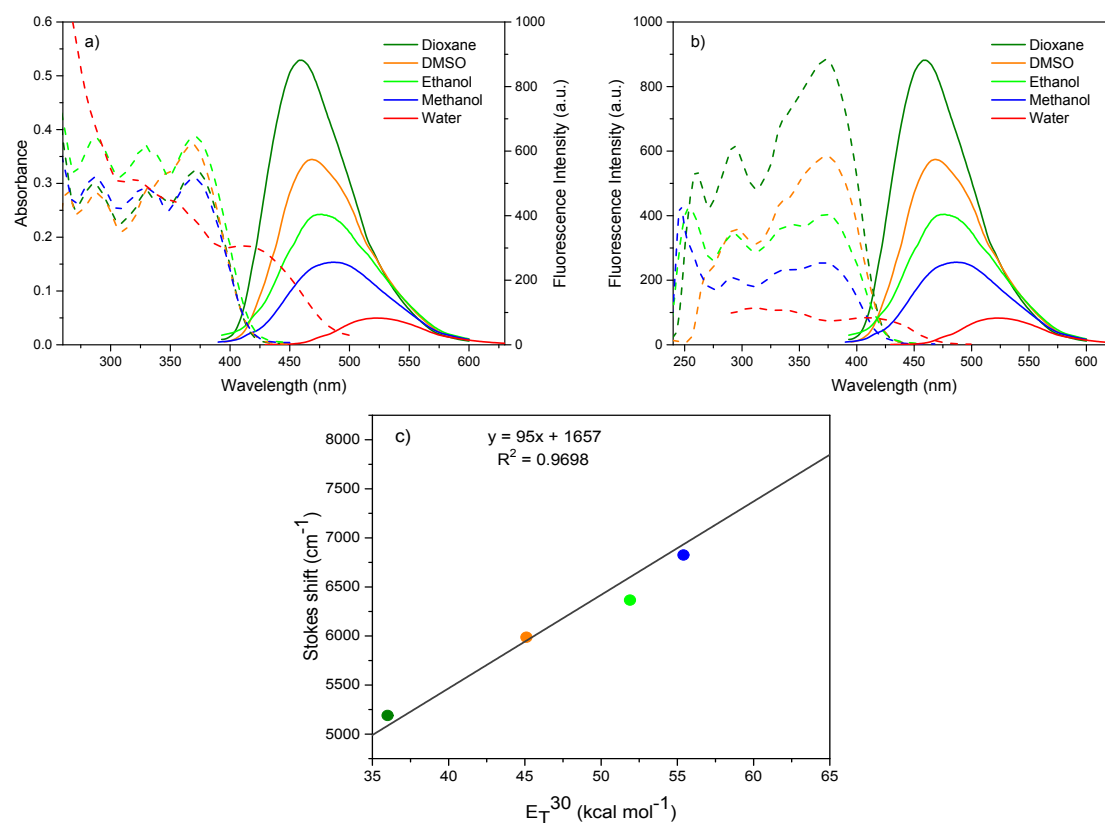

**Figure S8.** (a) Absorbance (30.0  $\mu\text{M}$ , dash) and emission (10.0  $\mu\text{M}$ , solid) spectra of **7h** in various solvents. (b) Excitation (dash line) and emission (solid line) spectra of **7h** in various solvents. (c) Linear relationship between stokes shift and solvent polarity of **7h** in various solvents.

| compound                                                                                       | solvent  | $\lambda_{\text{abs}}$ | $\lambda_{\text{em}}$ | Stokes shift | $\phi$ |
|------------------------------------------------------------------------------------------------|----------|------------------------|-----------------------|--------------|--------|
| 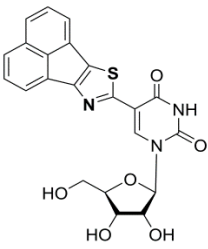<br><b>7i</b> | Dioxane  | 350                    | 549                   | 10356 (199)  | 0.004  |
|                                                                                                | DMSO     | 351                    | 552                   | 10374 (201)  | 0.002  |
|                                                                                                | Ethanol  | 348                    | 547                   | 10454 (199)  | 0.003  |
|                                                                                                | Methanol | 348                    | 549                   | 10521 (201)  | 0.004  |
|                                                                                                | Water    | 350                    | 557                   | 10618 (207)  | 0.001  |

**Table S9.** Absorbance and emission maxima of **7i** in dioxane, DMSO, ethanol, methanol and water.  $\lambda_{\text{abs}}$ ,  $\lambda_{\text{em}}$  and Stokes shift are reported in nm, nm and  $\text{cm}^{-1}$  (nm). Quantum yield values were measured at  $\lambda_{\text{abs}} = 360$  nm using quinine sulfate in 0.5 M  $\text{H}_2\text{SO}_4$  ( $\Phi_{\text{fl}} = 0.55$ ) as the standard.

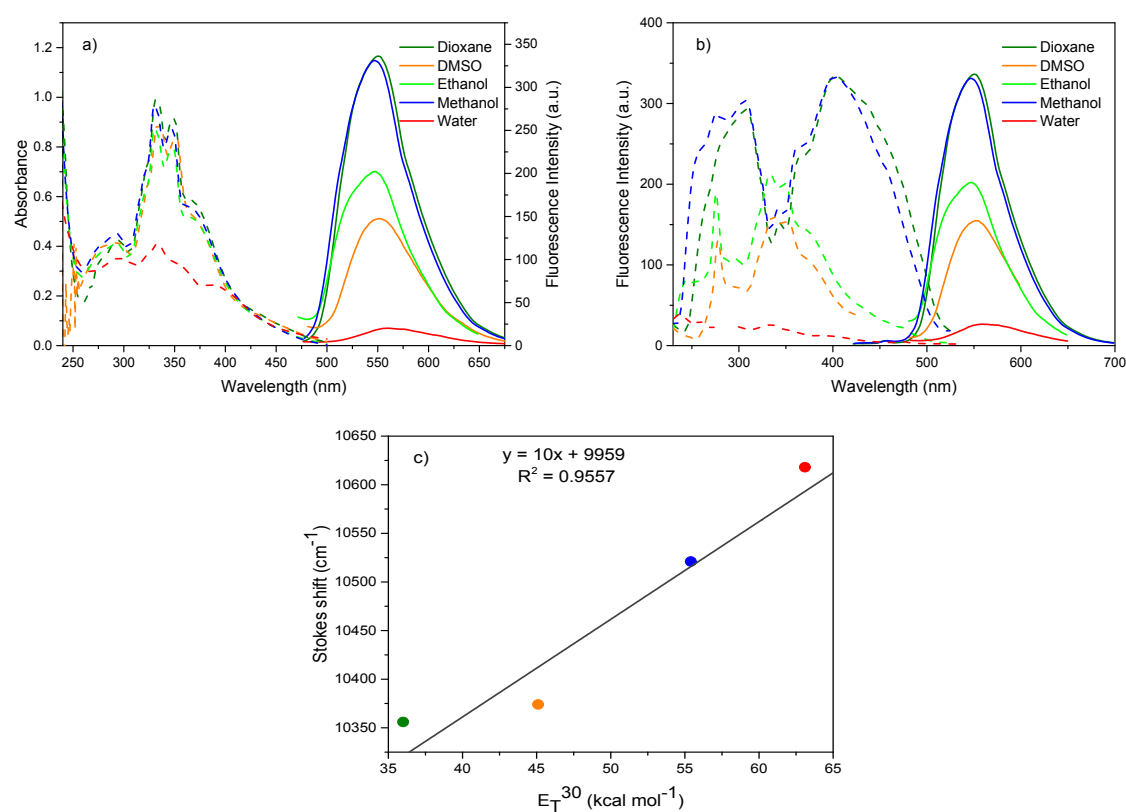

**Figure S9.** (a) Absorbance (30.0  $\mu\text{M}$ , dash) and emission (10.0  $\mu\text{M}$ , solid) spectra of **7i** in various solvents. (b) Excitation (dash line) and emission (solid line) spectra of **7i** in various solvents. (c) Linear relationship between stokes shift and solvent polarity of **7i** in various solvents.

| compound                                                                                       | solvent  | $\lambda_{\text{abs}}$ | $\lambda_{\text{em}}$ | Stokes shift | $\phi$ |
|------------------------------------------------------------------------------------------------|----------|------------------------|-----------------------|--------------|--------|
| 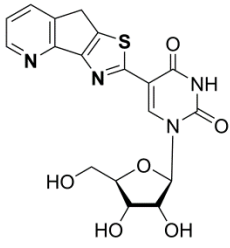<br><b>7j</b> | Dioxane  | 354                    | 420                   | 4439 (66)    | 0.082  |
|                                                                                                | DMSO     | 354                    | 435                   | 5260 (81)    | 0.124  |
|                                                                                                | Ethanol  | 347                    | 425                   | 5289 (78)    | 0.101  |
|                                                                                                | Methanol | 347                    | 428                   | 5454 (81)    | 0.112  |
|                                                                                                | Water    | 347                    | 447                   | 6447 (100)   | 0.161  |

**Table S10.** Absorbance and emission maxima of **7j** in dioxane, DMSO, ethanol, methanol and water.  $\lambda_{\text{abs}}$ ,  $\lambda_{\text{em}}$  and Stokes shift are reported in nm, nm and  $\text{cm}^{-1}$  (nm). Quantum yield values were measured at  $\lambda_{\text{abs}} = 360$  nm using quinine sulfate in 0.5 M  $\text{H}_2\text{SO}_4$  ( $\Phi_{\text{fl}} = 0.55$ ) as the standard.

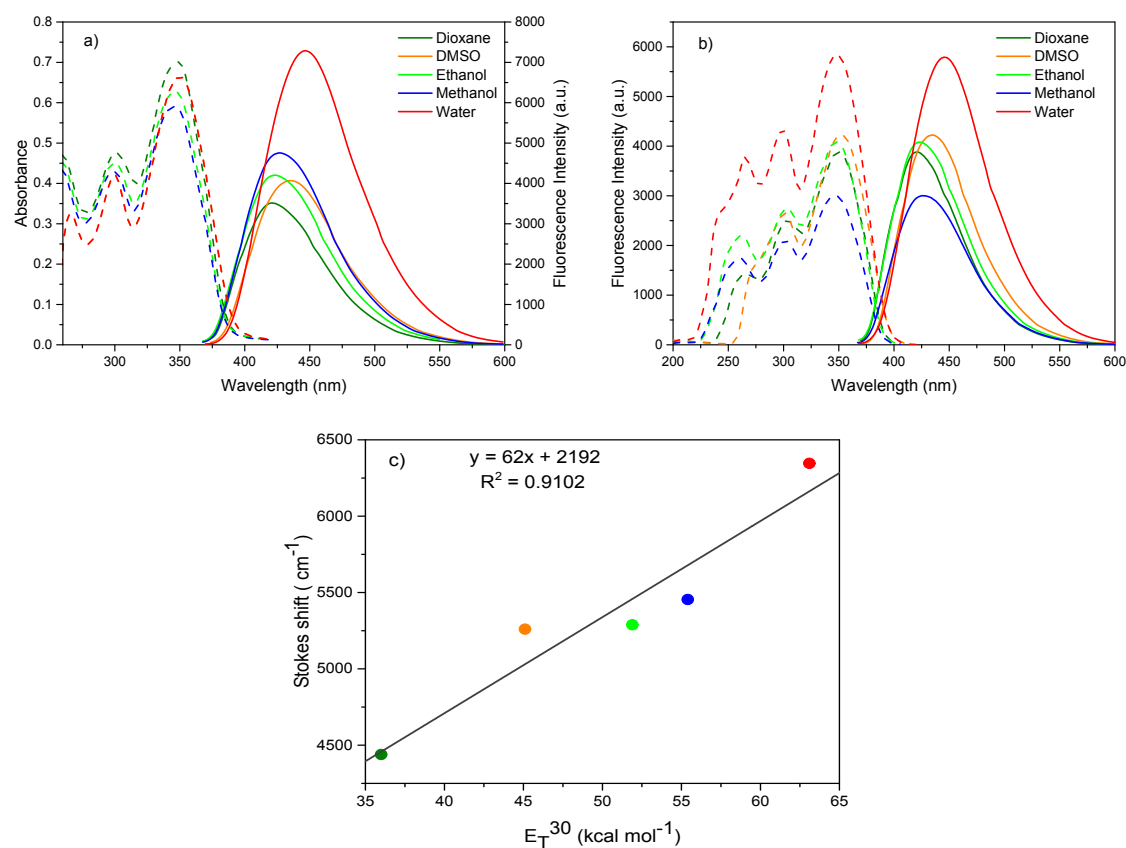

**Figure S10.** (a) Absorbance (30  $\mu\text{M}$ , dash) and emission (10.0  $\mu\text{M}$ , solid) spectra of **7j** in .and mixtures (grey). (b) Excitation (dash line) and emission (solid line) spectra of **7j** in various solvents. (c) Linear relationship between stokes shift and solvent polarity of **7j** in various solvents.

| compound                                                                                       | solvent  | $\lambda_{\text{abs}}$ | $\lambda_{\text{em}}$ | Stokes shift | $\phi$ |
|------------------------------------------------------------------------------------------------|----------|------------------------|-----------------------|--------------|--------|
| 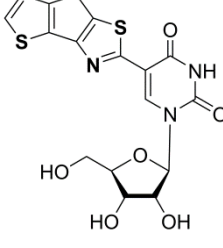<br><b>7k</b> | Dioxane  | 369                    | 468                   | 5733 (99)    | 0.039  |
|                                                                                                | DMSO     | 371                    | 493                   | 6670 (122)   | 0.042  |
|                                                                                                | Ethanol  | 372                    | 496                   | 6720 (124)   | 0.039  |
|                                                                                                | Methanol | 371                    | 502                   | 7034 (131)   | 0.040  |
|                                                                                                | Water    | 372                    | 535                   | 8190 (163)   | 0.002  |

**Table S11.** Absorbance and emission maxima of **7k** in dioxane, DMSO, ethanol, methanol and water.  $\lambda_{\text{abs}}$ ,  $\lambda_{\text{em}}$  and Stokes shift are reported in nm, nm and  $\text{cm}^{-1}$  (nm). Quantum yield values were measured at  $\lambda_{\text{abs}} = 365$  nm using quinine sulfate in 0.5 M  $\text{H}_2\text{SO}_4$  ( $\Phi_{\text{fl}} = 0.55$ ) as the standard.

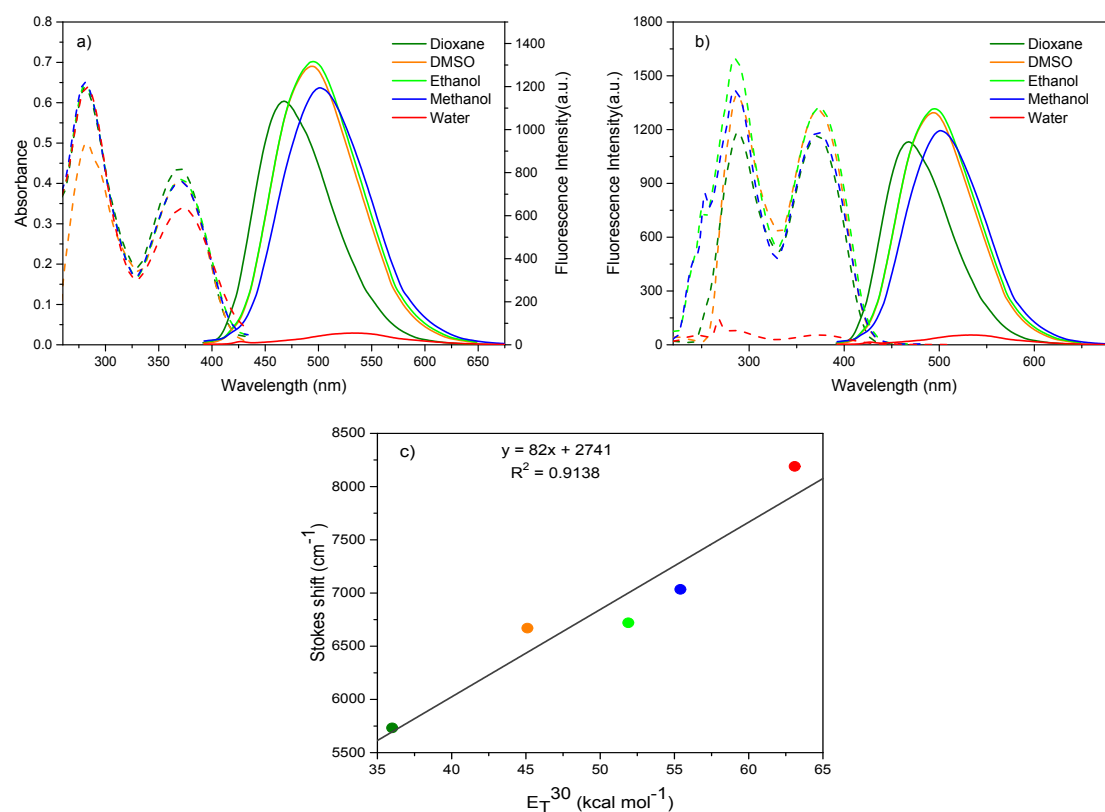

**Figure S11.** (a) Absorbance (30.0  $\mu\text{M}$ , dash) and emission (10.0  $\mu\text{M}$ , solid) spectra of **7k** in various solvents. (b) Excitation (dash line) and emission (solid line) spectra of **7k** in various solvents. (c) Linear relationship between stokes shift and solvent polarity of **7k** in various solvents.

| compound                                                                                       | solvent  | $\lambda_{\text{abs}}$ | $\lambda_{\text{em}}$ | Stokes shift | $\phi$ |
|------------------------------------------------------------------------------------------------|----------|------------------------|-----------------------|--------------|--------|
| 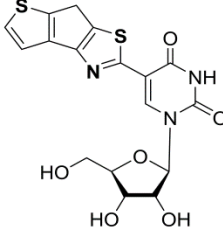<br><b>7I</b> | Dioxane  | 363                    | 456                   | 5666 (93)    | 0.091  |
|                                                                                                | DMSO     | 364                    | 473                   | 6331 (109)   | 0.176  |
|                                                                                                | Ethanol  | 360                    | 474                   | 6681 (116)   | 0.175  |
|                                                                                                | Methanol | 363                    | 486                   | 6972 (123)   | 0.157  |
|                                                                                                | Water    | 364                    | 513                   | 7979 (149)   | 0.005  |

**Table S12.** Absorbance and emission maxima of **7I** in dioxane, DMSO, ethanol, methanol and water.  $\lambda_{\text{abs}}$ ,  $\lambda_{\text{em}}$  and Stokes shift are reported in nm, nm and  $\text{cm}^{-1}$  (nm). Quantum yield values were measured at  $\lambda_{\text{abs}} = 360$  nm using quinine sulfate in 0.5 M  $\text{H}_2\text{SO}_4$  ( $\Phi_{\text{fl}} = 0.55$ ) as the standard.

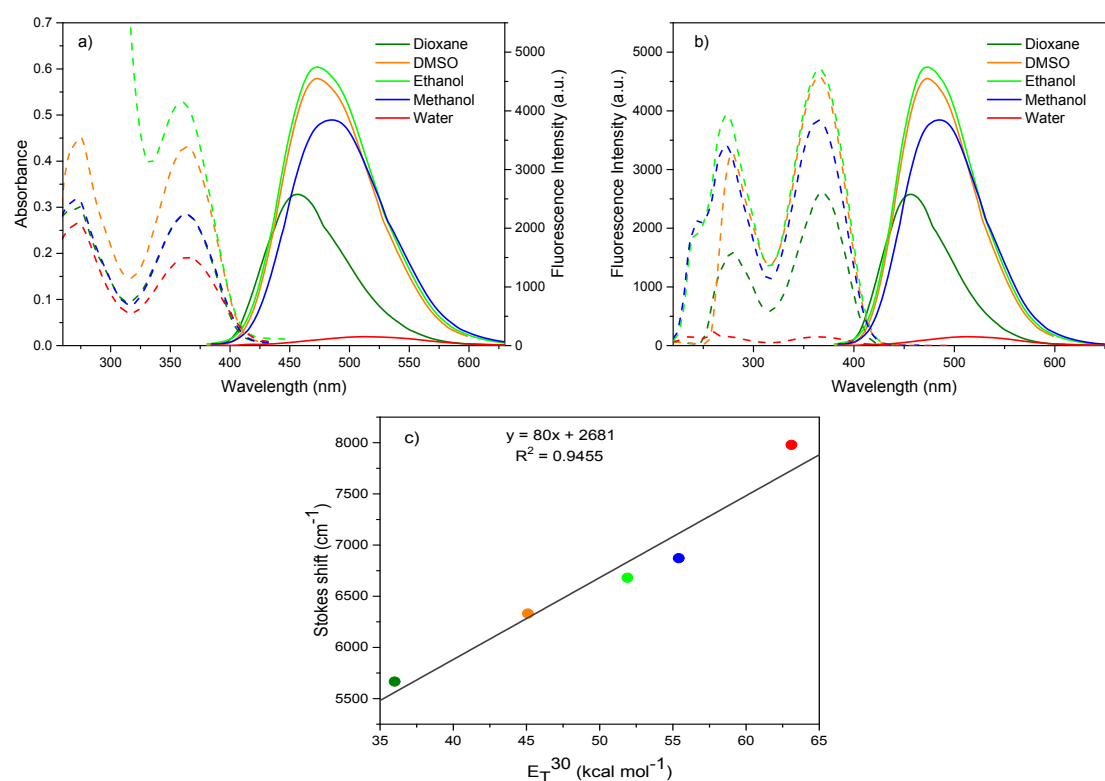

**Figure S12.** (a) Absorbance (30.0  $\mu\text{M}$ , dash) and emission (10.0  $\mu\text{M}$ , solid) spectra of **7I** in various solvents. (b) Excitation (dash line) and emission (solid line) spectra of **7I** in various solvents. (c) Linear relationship between stokes shift and solvent polarity of **7I** in various solvents.

| compound                                                                                       | solvent  | $\lambda_{\text{abs}}$ | $\lambda_{\text{em}}$ | Stokes shift | $\phi$ |
|------------------------------------------------------------------------------------------------|----------|------------------------|-----------------------|--------------|--------|
| 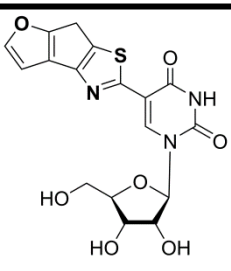<br><b>7m</b> | Dioxane  | 370                    | 464                   | 5475 (94)    | 0.126  |
|                                                                                                | DMSO     | 368                    | 488                   | 6682 (120)   | 0.181  |
|                                                                                                | Ethanol  | 368                    | 492                   | 6849 (124)   | 0.143  |
|                                                                                                | Methanol | 367                    | 497                   | 7127 (130)   | 0.069  |
|                                                                                                | Water    | 356                    | 485                   | 7471 (129)   | 0.005  |

**Table S13.** Absorbance and emission maxima of **7m** in dioxane, DMSO, ethanol, methanol and water.  $\lambda_{\text{abs}}$ ,  $\lambda_{\text{em}}$  and Stokes shift are reported in nm, nm and  $\text{cm}^{-1}$  (nm). Quantum yield values were measured at  $\lambda_{\text{abs}} = 360$  nm using quinine sulfate in 0.5 M  $\text{H}_2\text{SO}_4$  ( $\Phi_{\text{fl}} = 0.55$ ) as the standard.

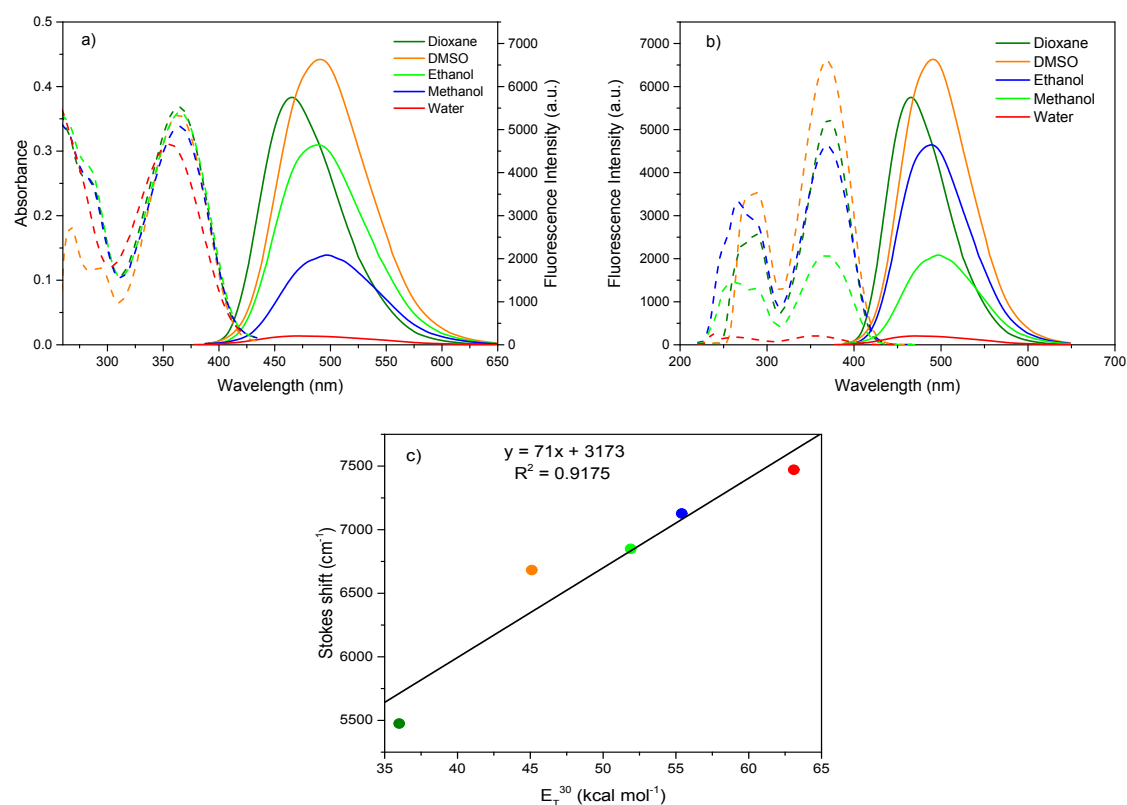

**Figure S13.** (a) Absorbance (30.0  $\mu\text{M}$ , dash) and emission (10.0  $\mu\text{M}$ , solid) spectra of **7m** in various solvents. (b) Excitation (dash line) and emission (solid line) spectra of **7m** in various solvents. (c) Linear relationship between stokes shift and solvent polarity of **7m** in various solvents.

**LC chromatograms of compound 7b, 7c, 7e and 7l at pH 1, 7 and 13.**

(a) pH = 7 time = 0 h

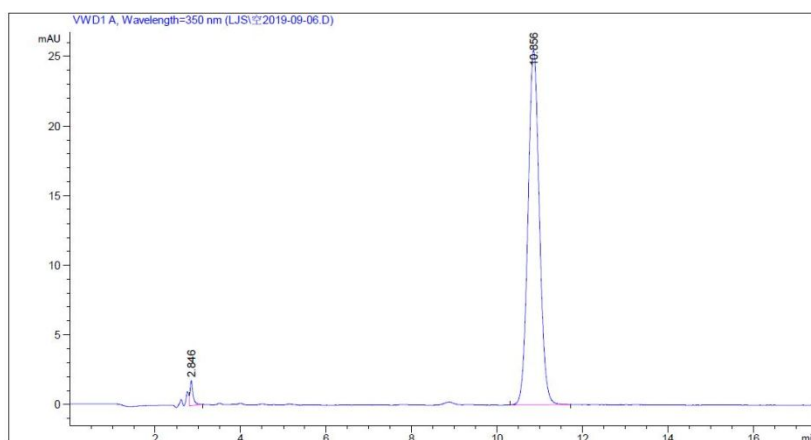

(b) pH = 1 time = 0 h

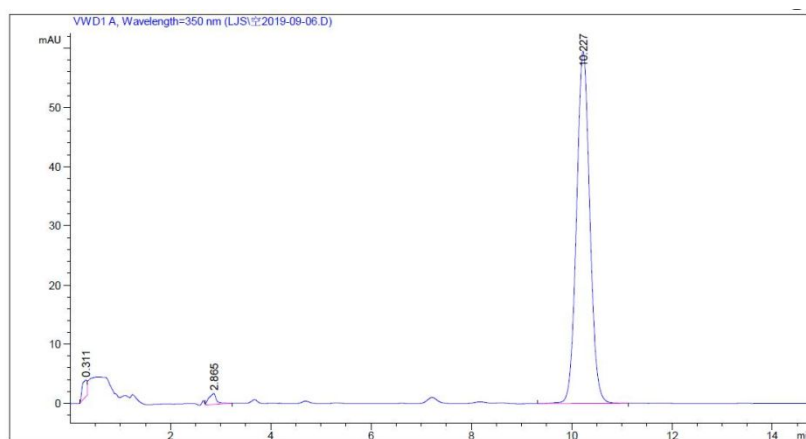

(c) pH = 1 time = 0.5 h

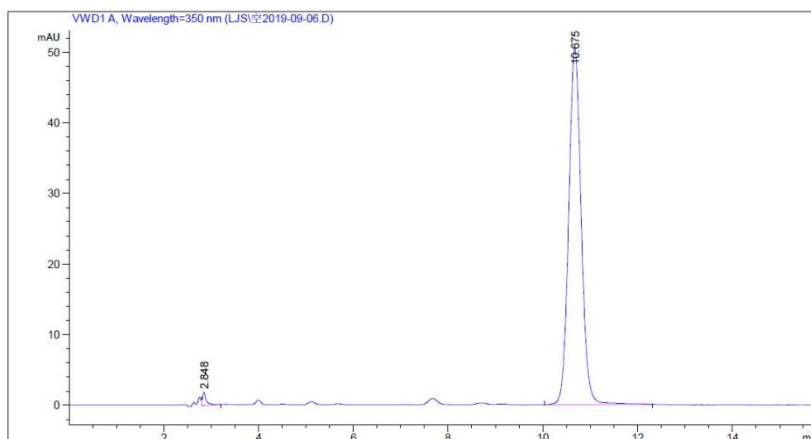



(d) pH = 1 time = 1 h

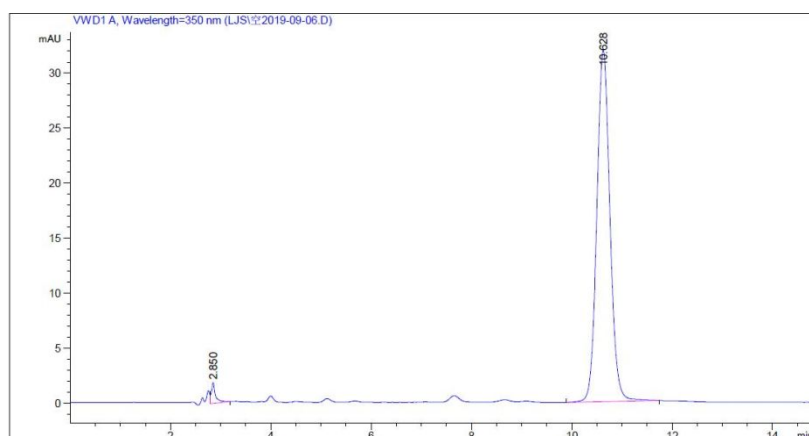

(e) pH = 1 time = 3 h

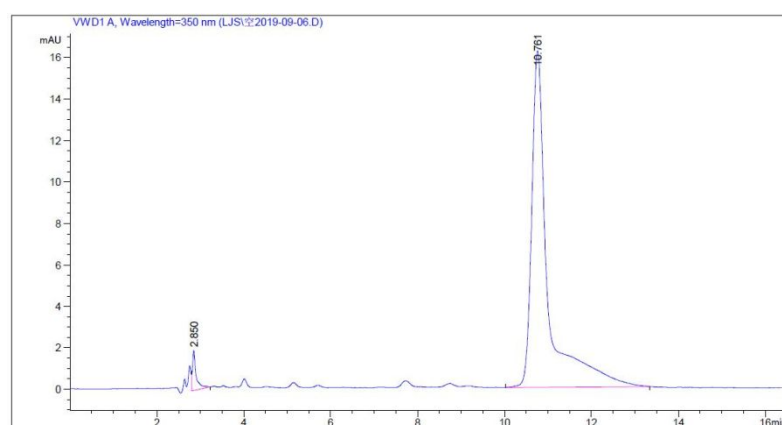

(f) pH = 13 time = 0 h

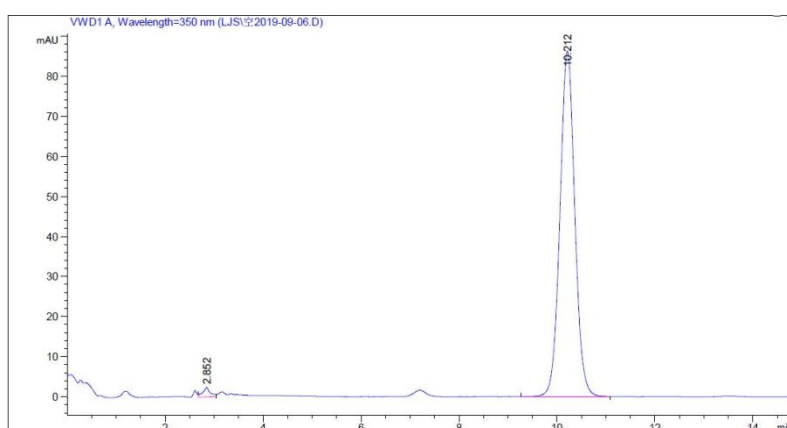

(g) pH = 13 time = 0.5 h

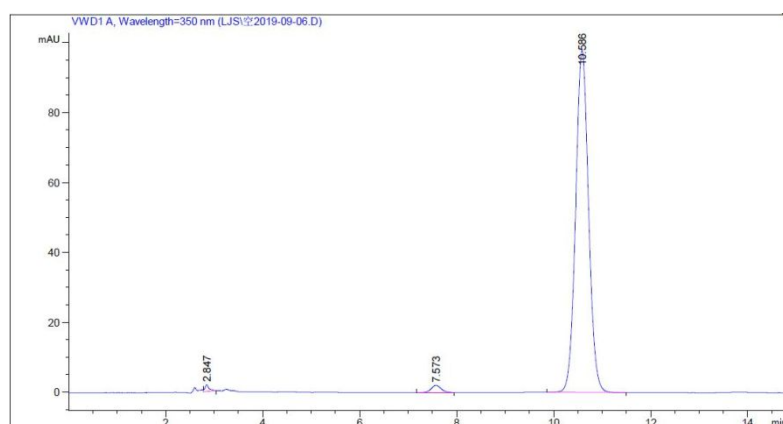

(h) pH = 13 time = 1 h

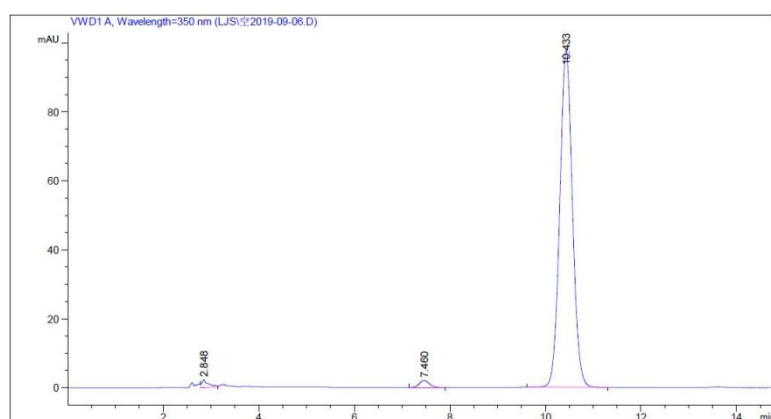

(i) pH = 13 time = 3 h

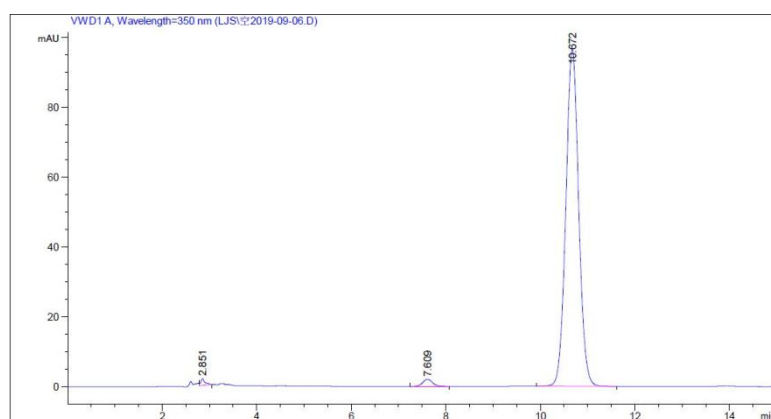

**S14** HPLC profiles (column 250 × 10 mm, RP-18) of the **7b** at room temperature (a) in pH=7; (b) in pH=1, after 0 h; (c) in pH=1, after 0.5 h; (d) in pH=1, after 1 h; (e) in pH=1, after 3 h; (f) in pH=13, after 0 h; (g) in pH=13, after 0.5 h; (h) in pH=13, after 1 h; (i) in pH=13, after 3 h. Buffer: 45% MeOH in aqueous 10 mM phosphate, pH = 7.0, 1.0 mL min<sup>-1</sup>. The profile was measured at 350 nm.

(a) pH = 7.0

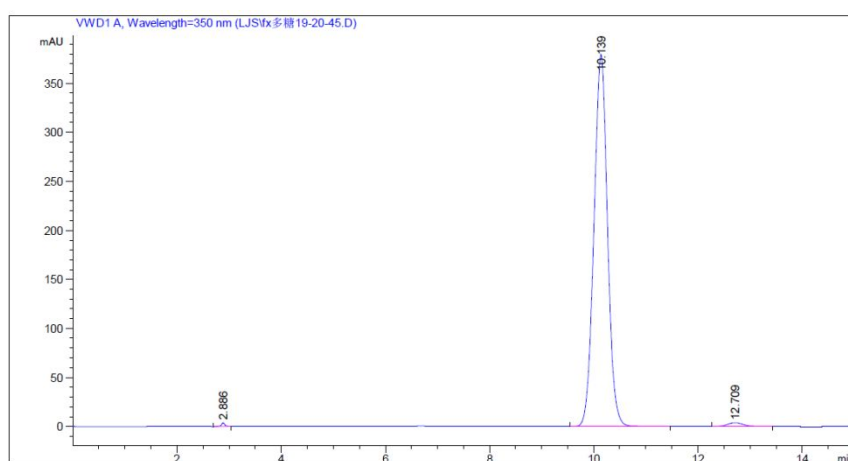

(b) pH = 1 time = 0 h

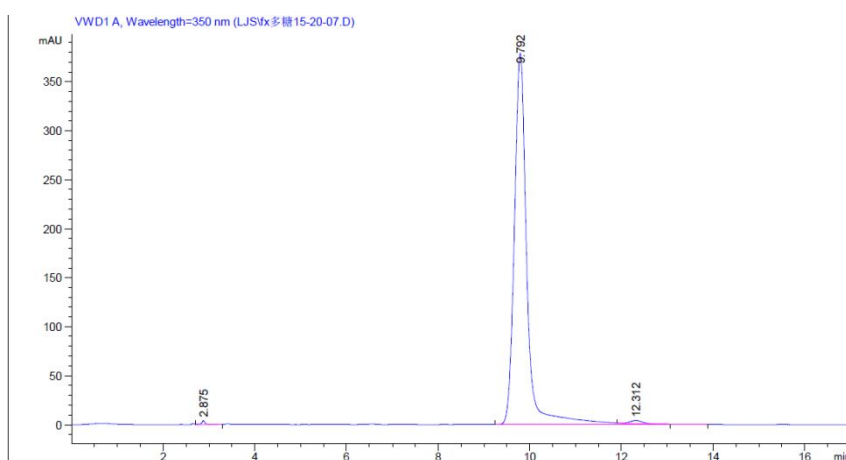

(c) pH = 1 time = 0.5 h

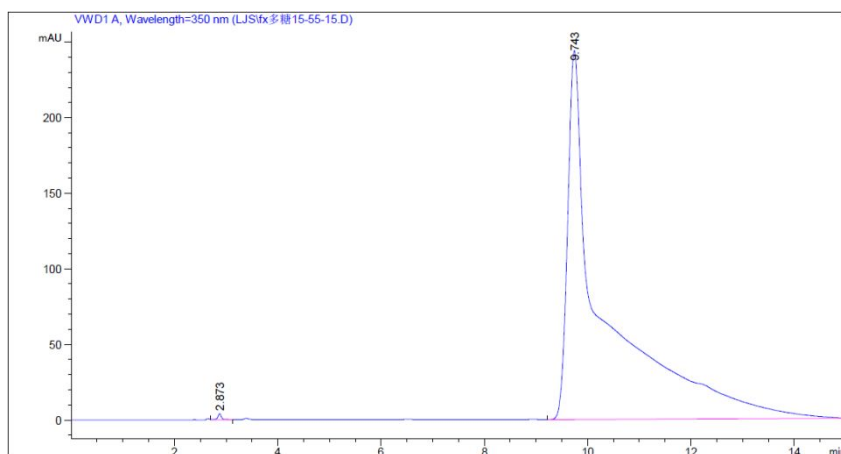

(d) pH = 1 time = 1 h

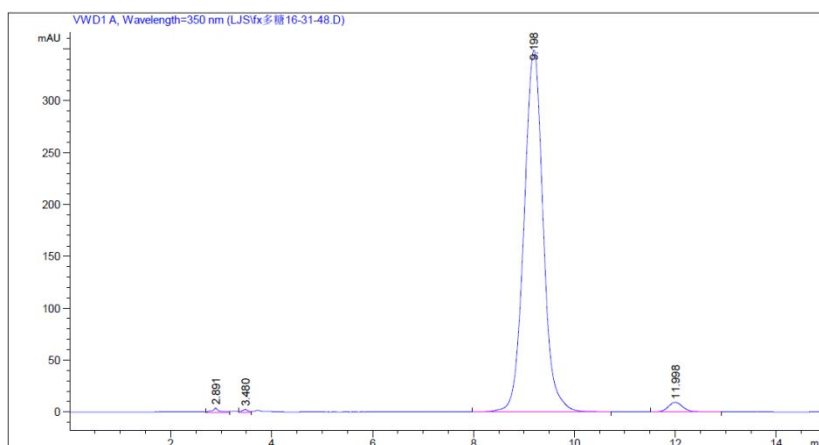

(e) pH = 1 time = 3 h

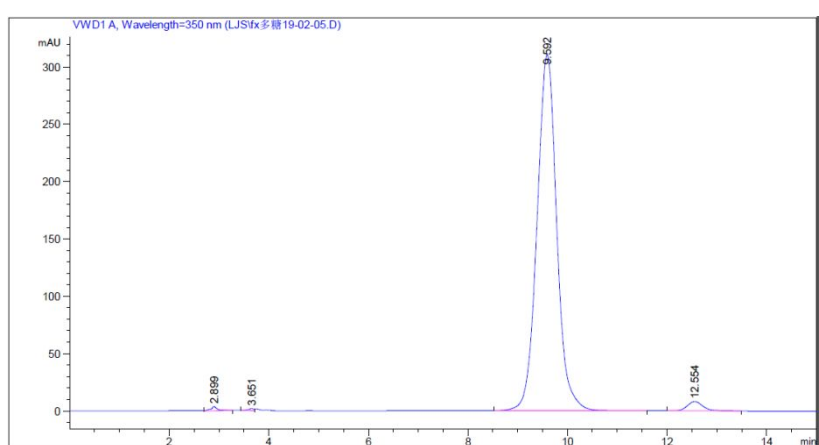

(f) pH = 13 time = 0 h

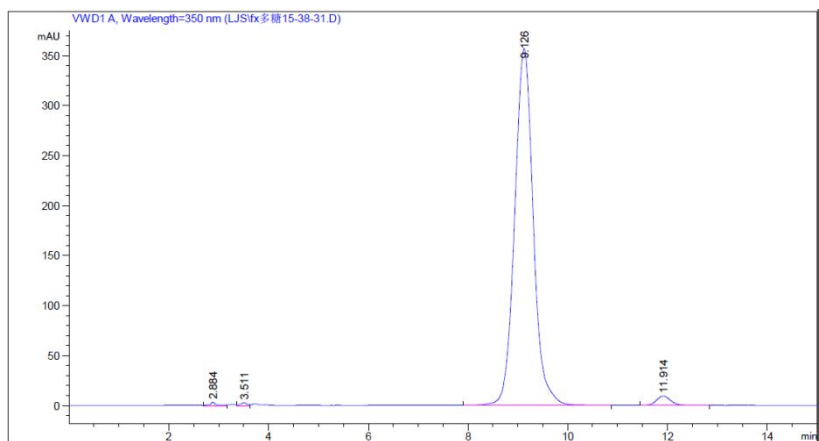

(g) pH = 13 time = 0.5 h

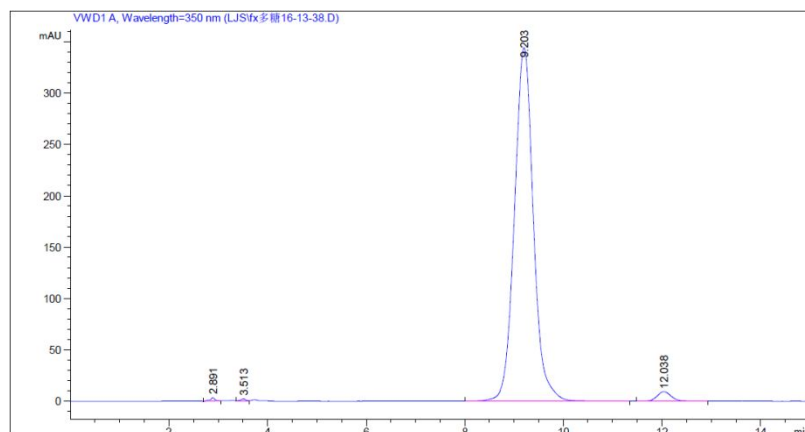

(h) pH = 13 time = 1 h

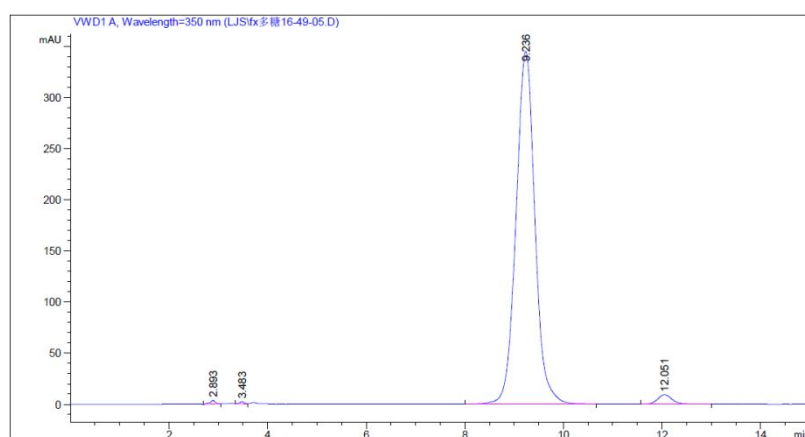

(i) pH = 13 time = 3 h

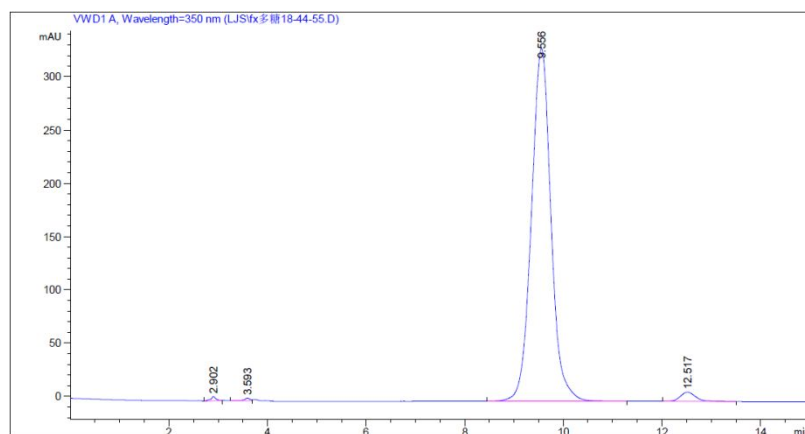

**S15** HPLC profiles (column 250 × 10 mm, RP-18) of the **7c** at room temperature (a) in pH=7; (b) in pH=1, after 0 h; (c) in pH=1, after 0.5 h; (d) in pH=1, after 1 h; (e) in pH=1, after 3 h; (f) in pH=13, after 0 h; (g) in pH=13, after 0.5 h; (h) in pH=13, after 1 h; (i) in pH=13, after 3 h. Buffer: 45% MeOH in aqueous 10 mM phosphate, pH = 7.0, 1.0 mL min<sup>-1</sup>. The profile was measured at 350 nm.

(a) pH = 7

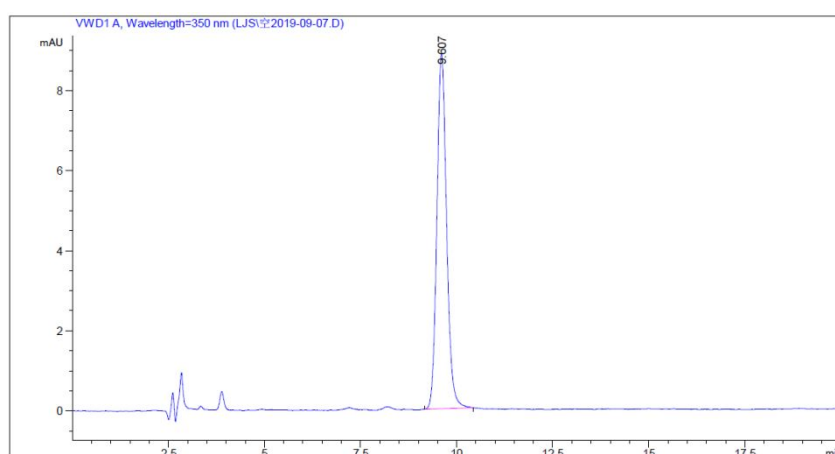

(b) pH = 1 time = 0 h

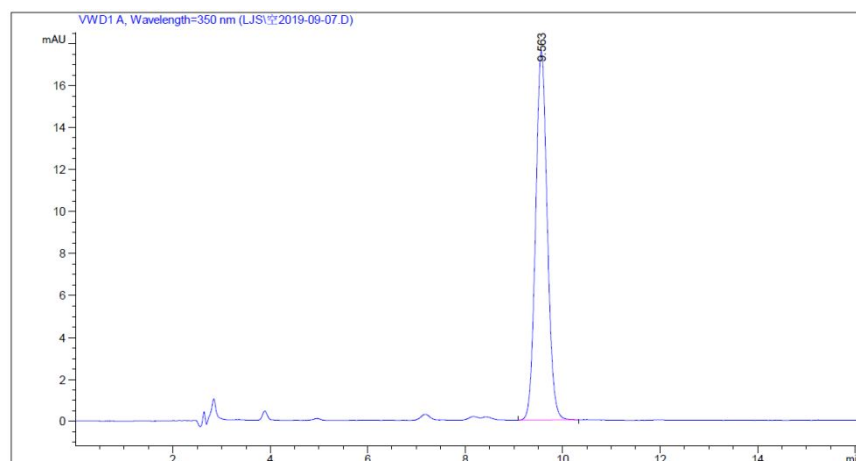

(c) pH = 1 time = 0.5 h

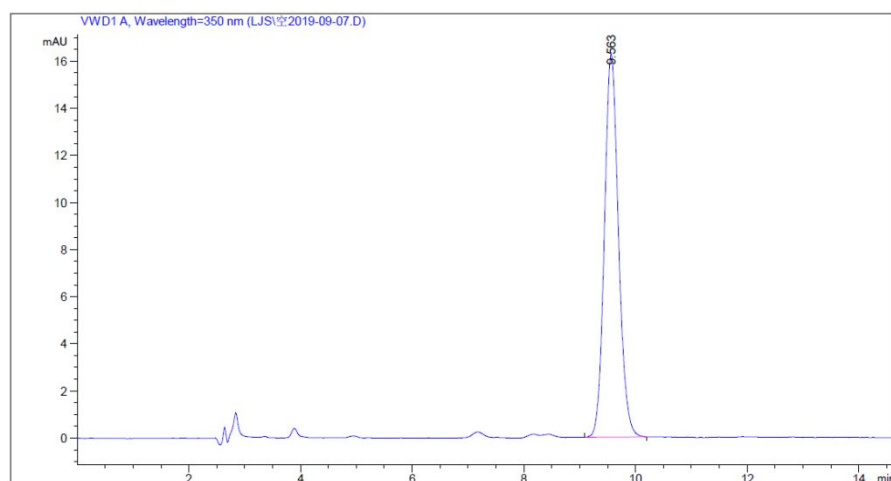

(d) pH = 1 time = 1 h

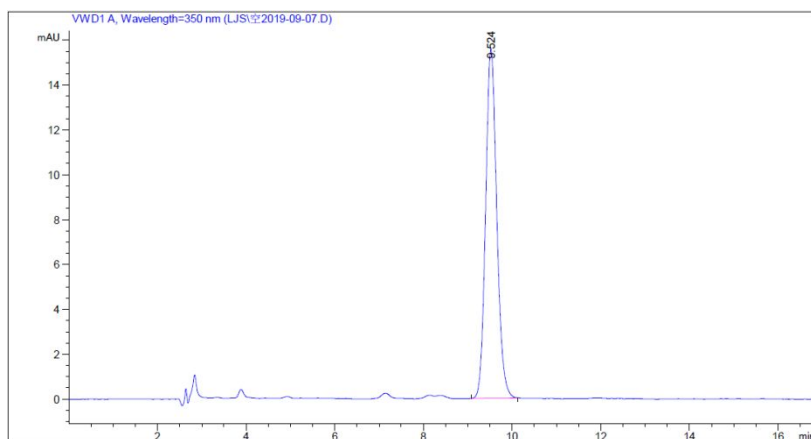

(e) pH = 1 time = 3 h

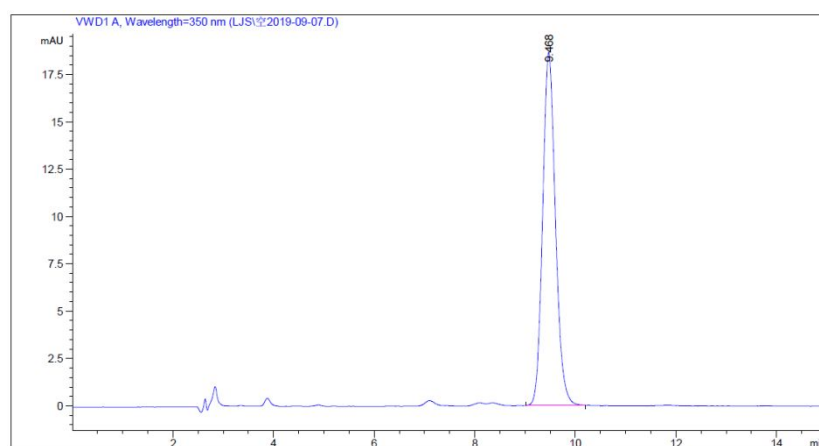

(f) pH = 13 time = 0 h

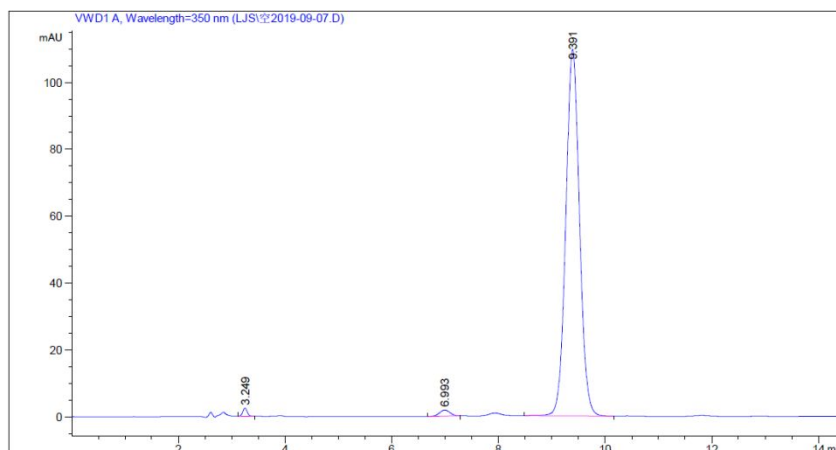

(g) pH = 13 time = 0.5 h

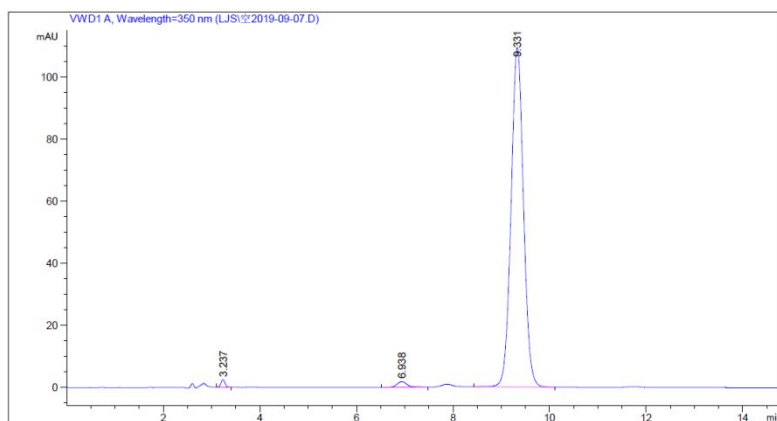

(h) pH = 13 time = 1 h

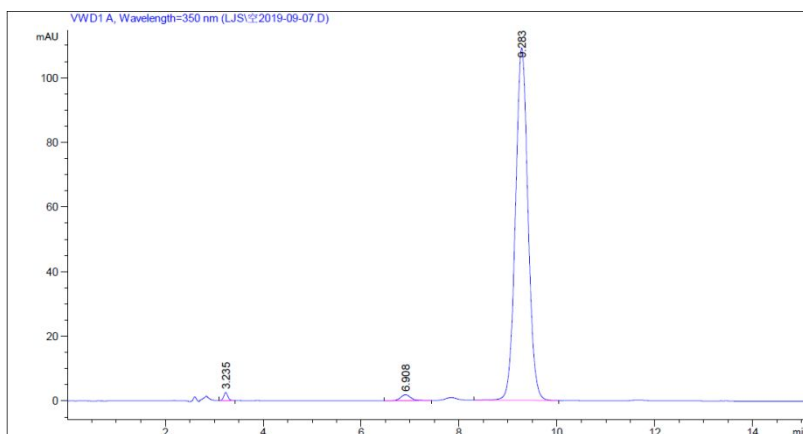

(i) pH = 13 time = 3 h

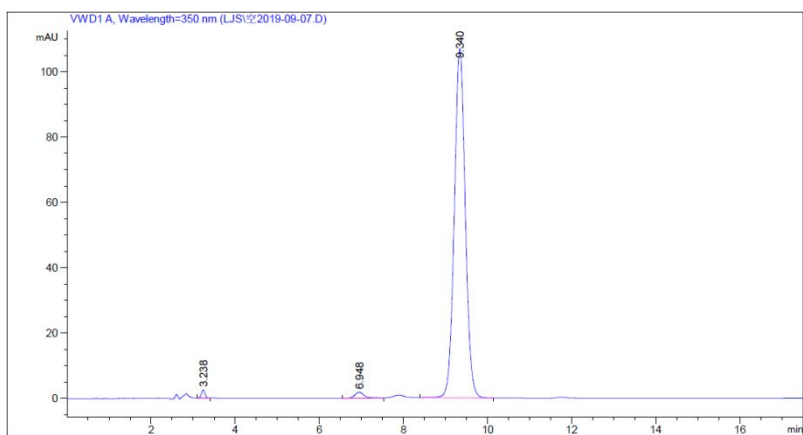

**S16** HPLC profiles (column 250 × 10 mm, RP-18) of the **7e** at room temperature (a) in pH=7; (b) in pH=1, after 0 h; (c) in pH=1, after 0.5 h; (d) in pH=1, after 1 h; (e) in pH=1, after 3 h; (f) in pH=13, after 0 h; (g) in pH=13, after 0.5 h; (h) in pH=13, after 1 h; (i) in pH=13, after 3 h. Buffer: 45% MeOH in aqueous 10 mM phosphate, pH = 7.0, 1.0 mL min<sup>-1</sup>. The profile was measured at 350 nm.



(a) pH = 7

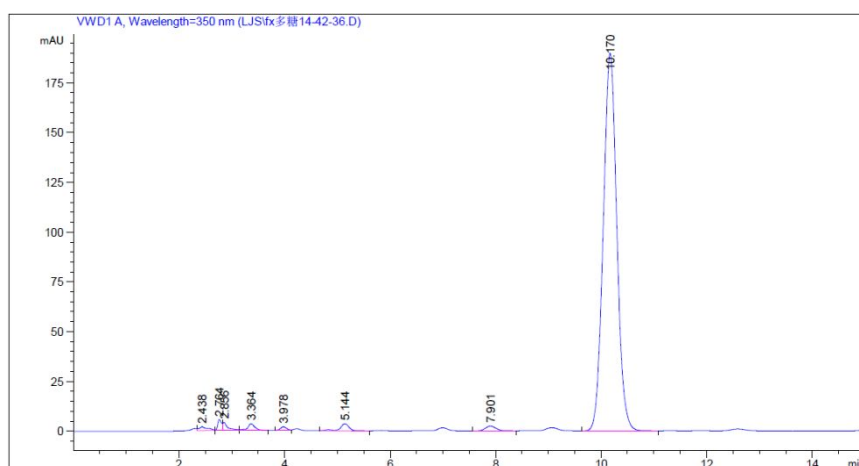

(b) pH = 1 time = 0 h

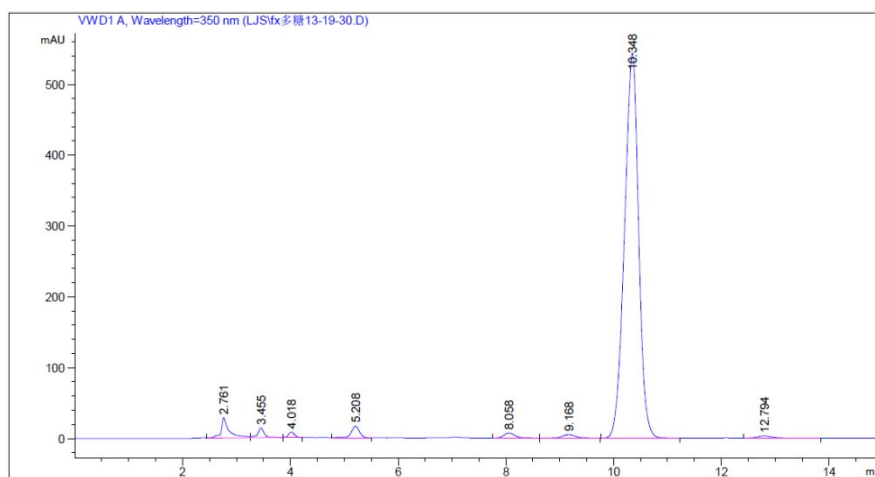

(c) pH = 1 time = 0.5 h

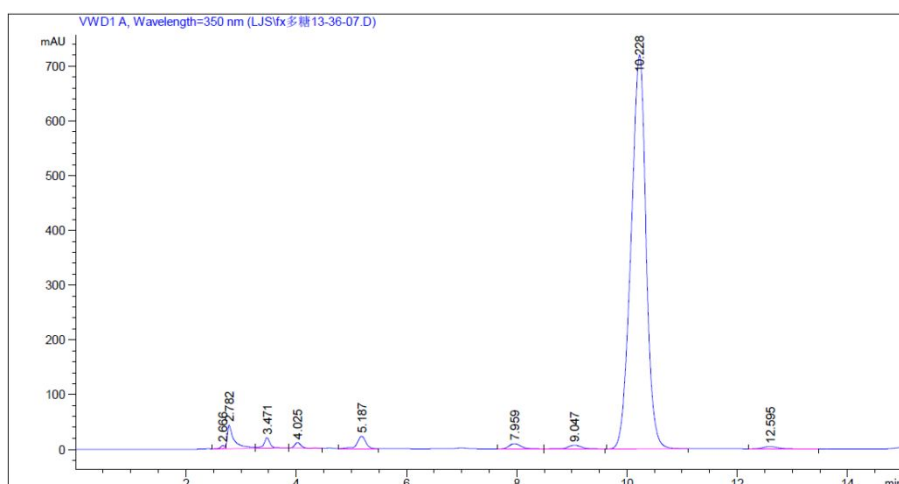

(d) pH = 1 time = 1 h

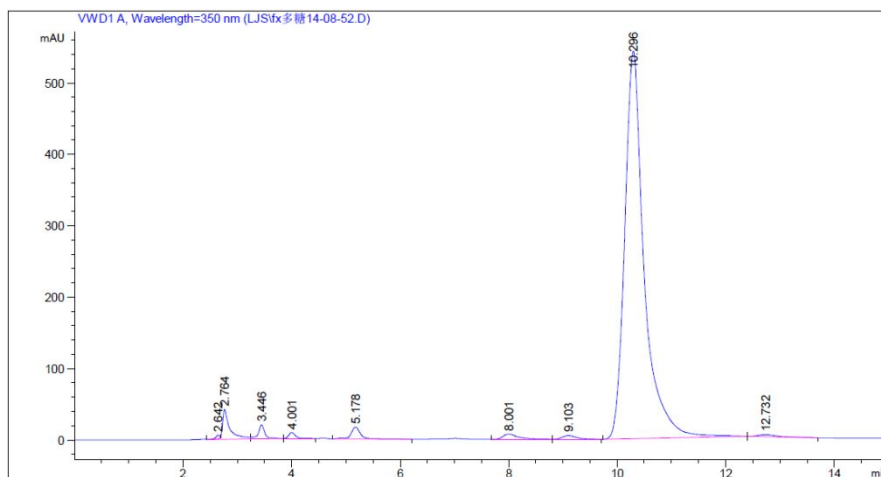

(e) pH = 1 time = 3 h

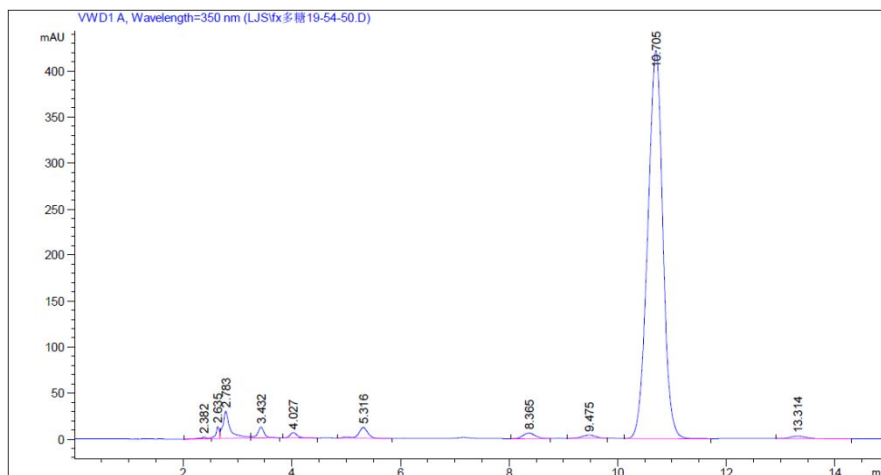

(f) pH = 13 time = 0 h

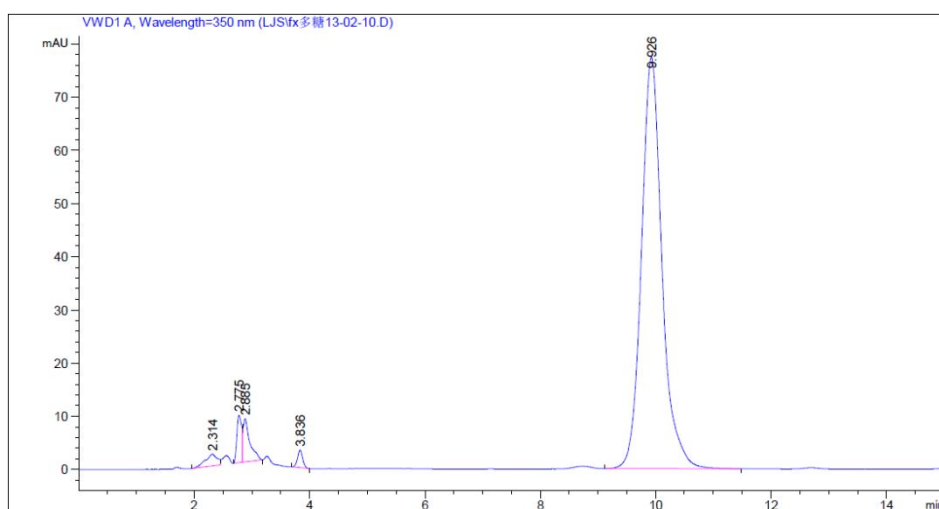

(g) pH = 13 time = 0.5 h

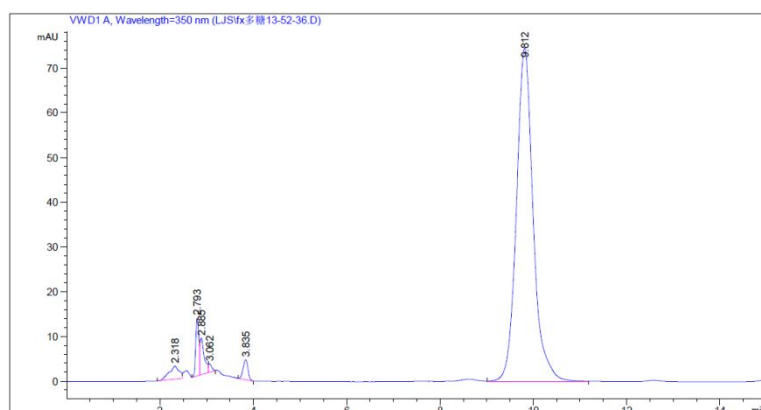

(h) pH = 13 time = 1 h

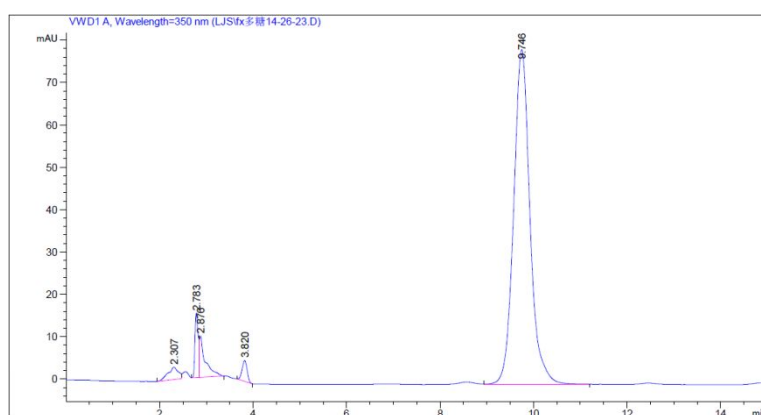

(i) pH = 13 time = 3 h

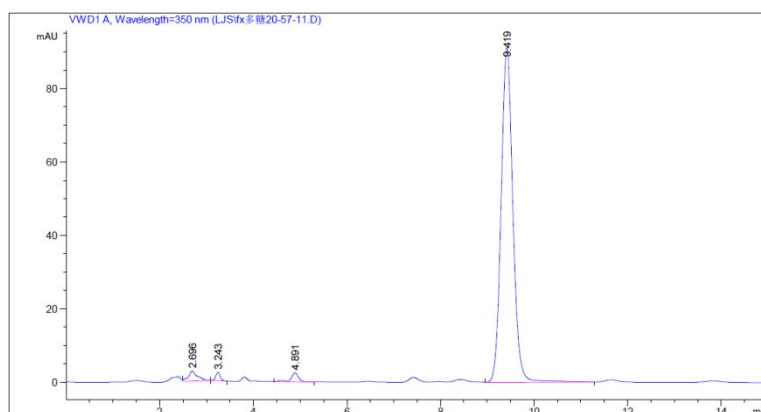

**S17** HPLC profiles (column 250 × 10 mm, RP-18) of the **7I** at room temperature (a) in pH=7; (b) in pH=1, after 0 h; (c) in pH=1, after 0.5 h; (d) in pH=1, after 1 h; (e) in pH=1, after 3 h; (f) in pH=13, after 0 h; (g) in pH=13, after 0.5 h; (h) in pH=13, after 1 h; (i) in pH=13, after 3 h. Buffer: 45% MeOH in aqueous 10 mM phosphate, pH = 7.0, 1.0 mL min<sup>-1</sup>. The profile was measured at 350 nm.

## Sensitivity to pH

Aqueous stock solutions (100 mL) were prepared by mixing aqueous sodium phosphate monobasic (0.5 M), aqueous sodium phosphate dibasic (0.5 M) and aqueous sodium chloride (2 M) to have a final concentration of 100 mM NaCl and 10 mM phosphate ions. The pH of each solution was adjusted to the desired value by adding aliquots of 2 M aqueous HCl or 2 M aqueous NaOH prior to spectral measurements.

The absorption and the emission were plotted versus the pH and fitted using a Boltzmann sigmoidal curve using OriginPro 2016.

### Absorption and steady-state emission spectroscopy for **7a**

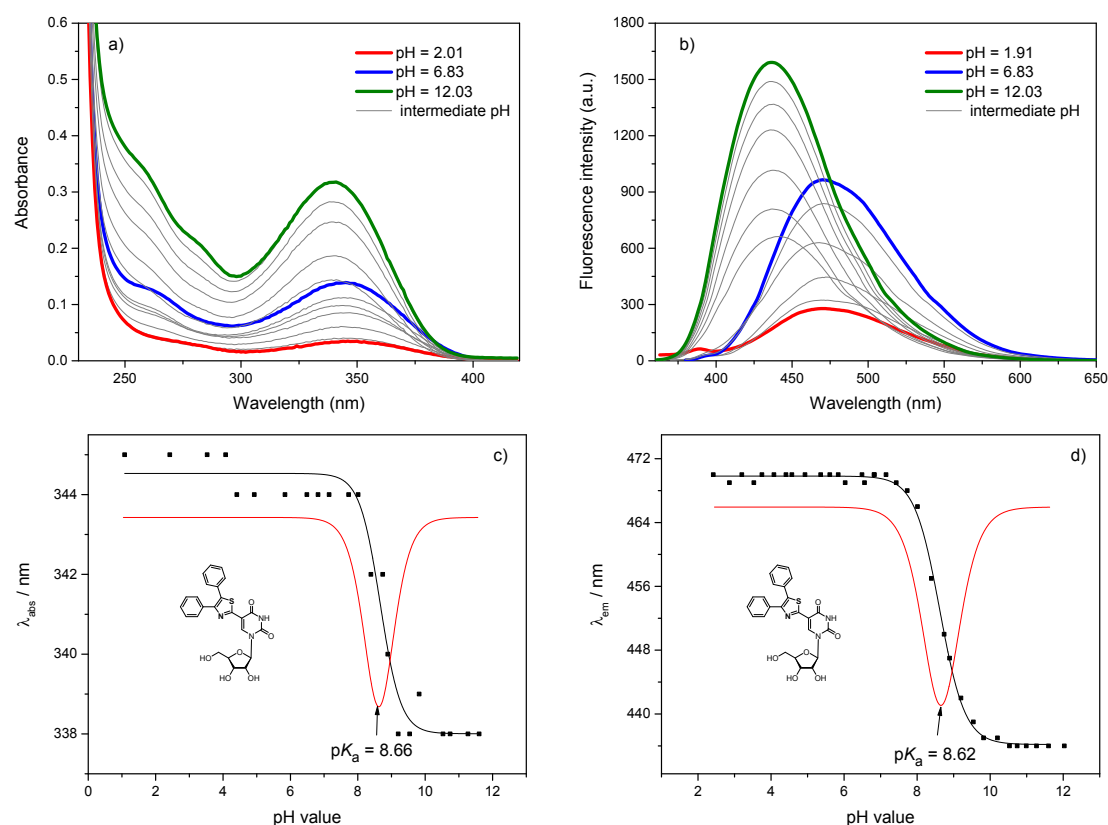

**Figure S18.** pH-Dependent UV spectra and fluorescence spectra of **7a** measured in 0.1 M sodium phosphate buffer with (a) UV-spectra at pH values from 2.01 to 12.03, (b) emission spectra at pH values from 1.91 to 12.03. (c) Graph of the absorption (abs) maxima against pH value (black line) and its first derivative (line marked in red) using data from (a). (d) Graph of the emission (em) maxima against pH value (black line) and its first derivative (line marked in red) using data from (b).

### Absorption and steady-state emission spectroscopy for **7b**

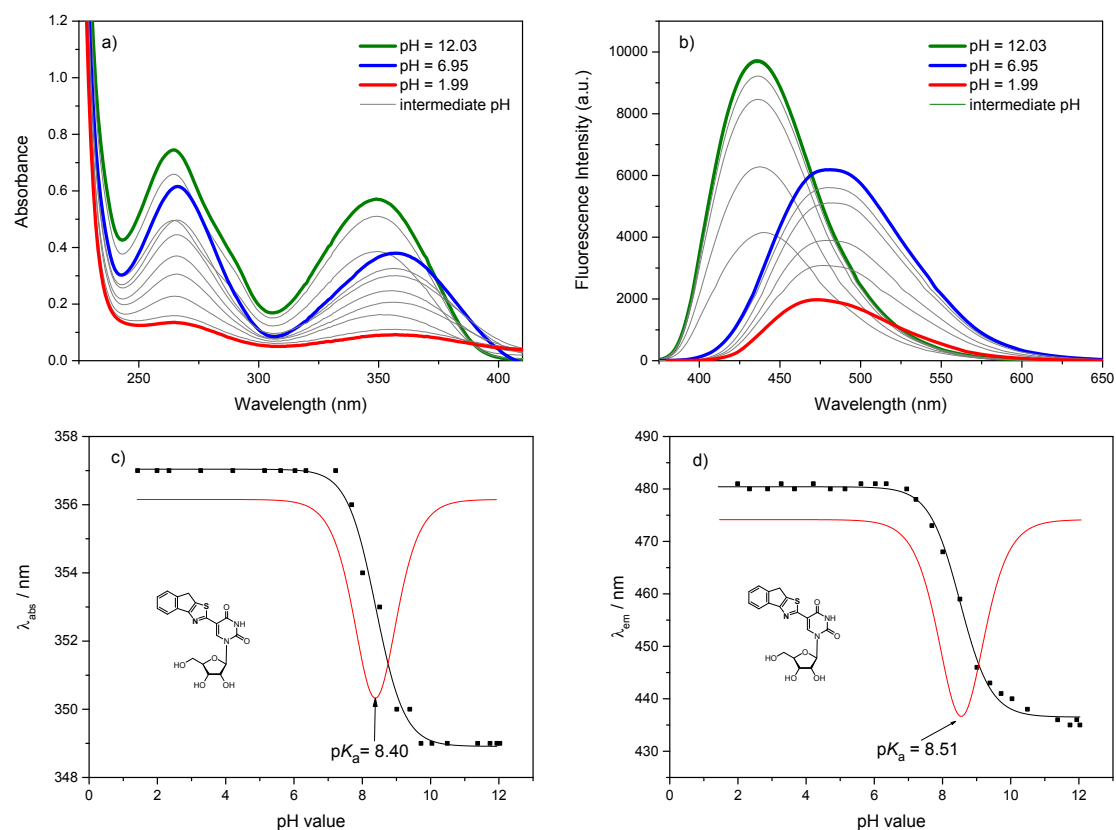

**Figure S19.** pH-Dependent UV spectra and fluorescence spectra of **7b** measured in 0.1 M sodium phosphate buffer with (a) UV-spectra at pH values from 1.99 to 12.03, (b) emission spectra at pH values from 1.99 to 12.03. (c) Graph of the absorption (abs) maxima against pH value (black line) and its first derivative (line marked in red) using data from (a). (d) Graph of the emission (em) maxima against pH value (black line) and its first derivative (lines marked in red) using data from (b).

### Absorption and fluorescence emission spectroscopy for **7c**

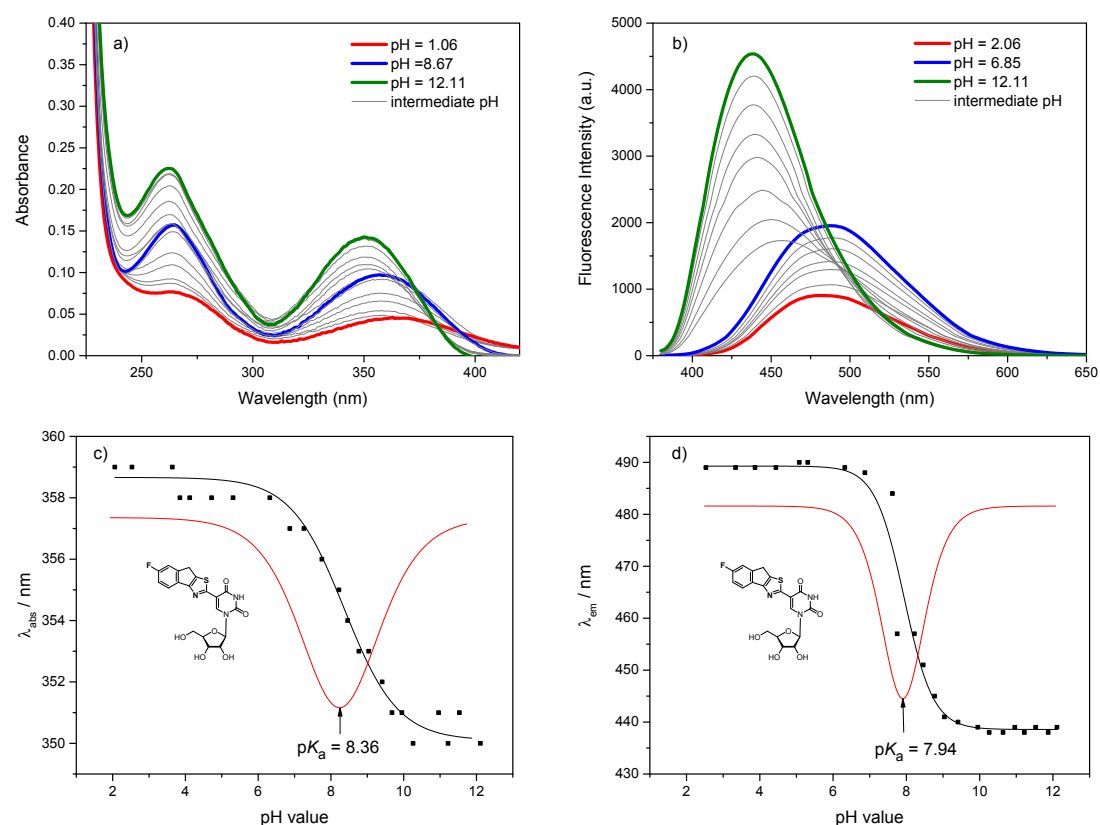

**Figure S20.** pH-Dependent UV spectra and fluorescence spectra of **7c** measured in 0.1 M sodium phosphate buffer with (a) UV-spectra at pH values from 1.06 to 12.11, (b) emission spectra at pH values from 2.06 to 12.11. (c) Graph of the absorption (abs) maxima against pH value (black line) and its first derivative (line marked in red) using data from (a). (d) Graph of the emission (em) maxima against pH value (black line) and its first derivative (line marked in red) using data from (b).

# Absorption and fluorescence emission spectroscopy for **7d**

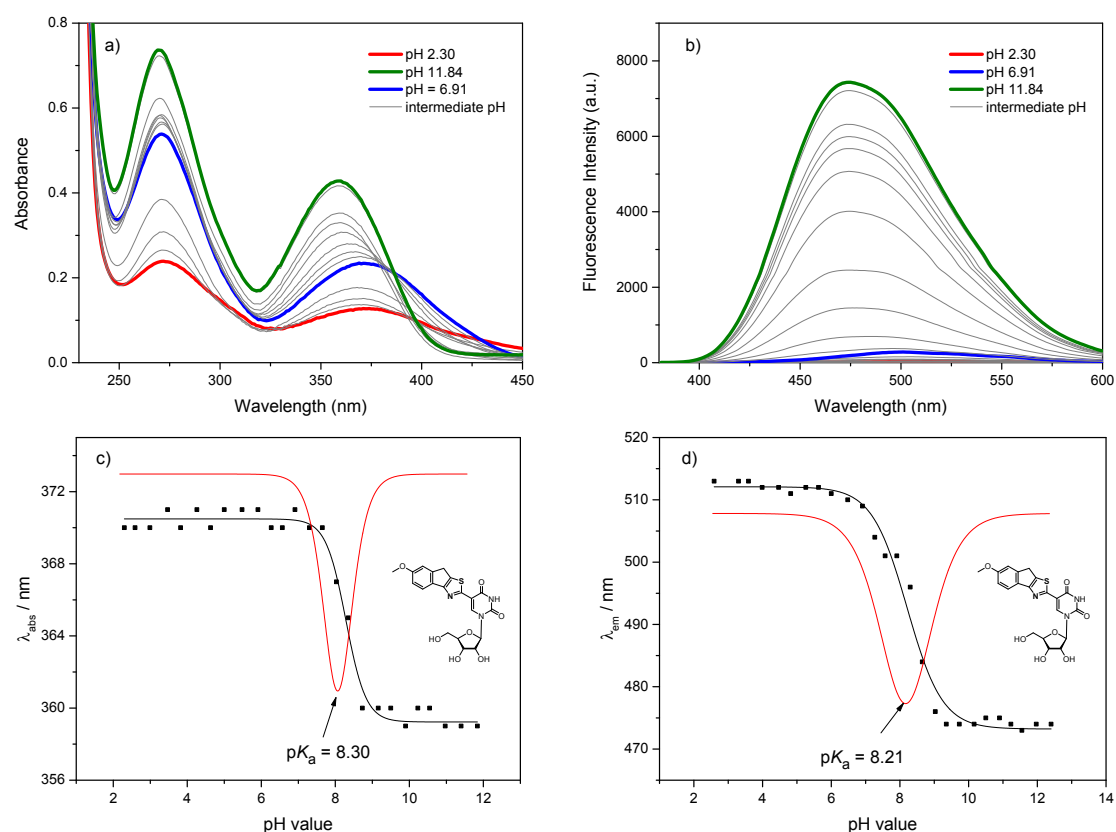

**Figure S21.** pH-Dependent UV spectra and fluorescence spectra of **7d** measured in 0.1 M sodium phosphate buffer with (a) UV-spectra at pH values from 1.06 to 12.11, (b) emission spectra at pH values from 2.06 to 12.11. (c) Graph of the absorbance against pH value (black line) and its first derivative (line marked in red) using data from (a). (d) Graph of the fluorescence emission against pH value (black line) and its first derivative (line marked in red) using data from (b).

# Absorption and fluorescence emission spectroscopy for **7e**

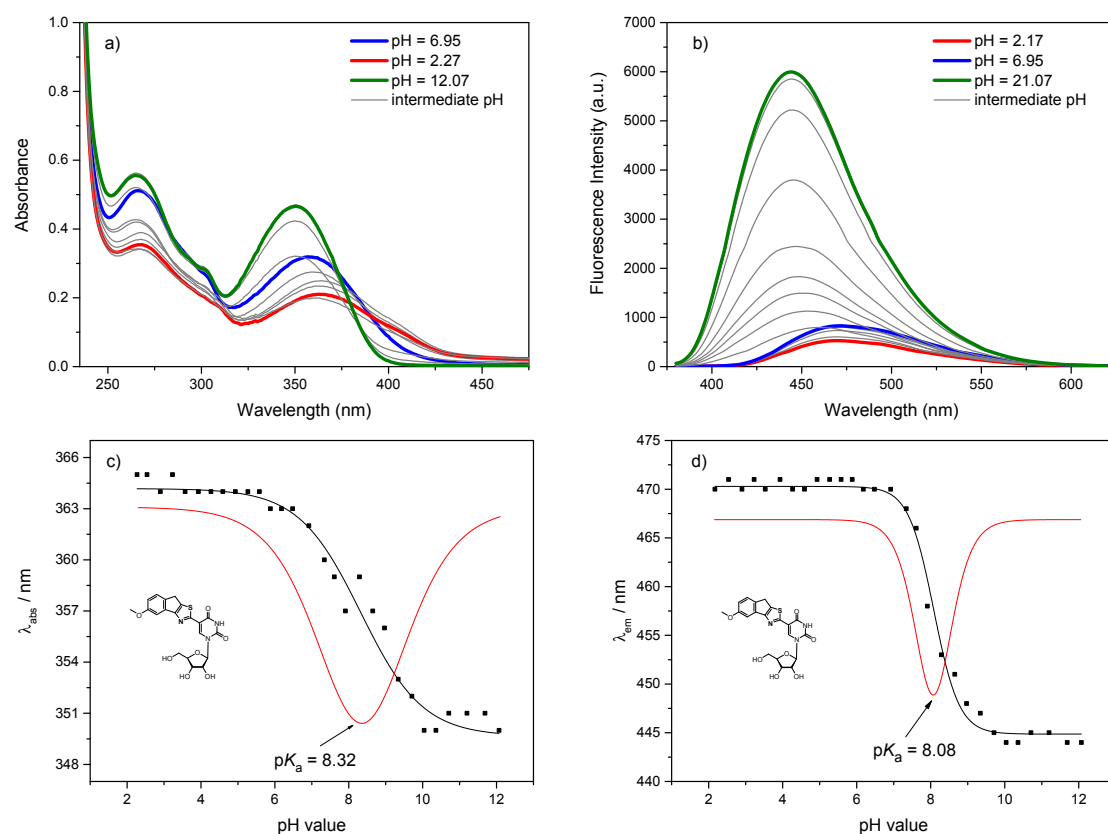

**Figure S22.** pH-Dependent UV spectra and fluorescence spectra of **7e** measured in 0.1 M sodium phosphate buffer with (a) UV-spectra at pH values from 2.27 to 12.07, (b) emission spectra at pH values from 2.17 to 12.07. (c) Graph of the absorbance against pH value (black line) and its first derivative (line marked in red) using data from (a). (d) Graph of the fluorescence emission against pH value (black line) and its first derivative (line marked in red) using data from (b).



### Absorption and fluorescence emission spectroscopy for **7g**

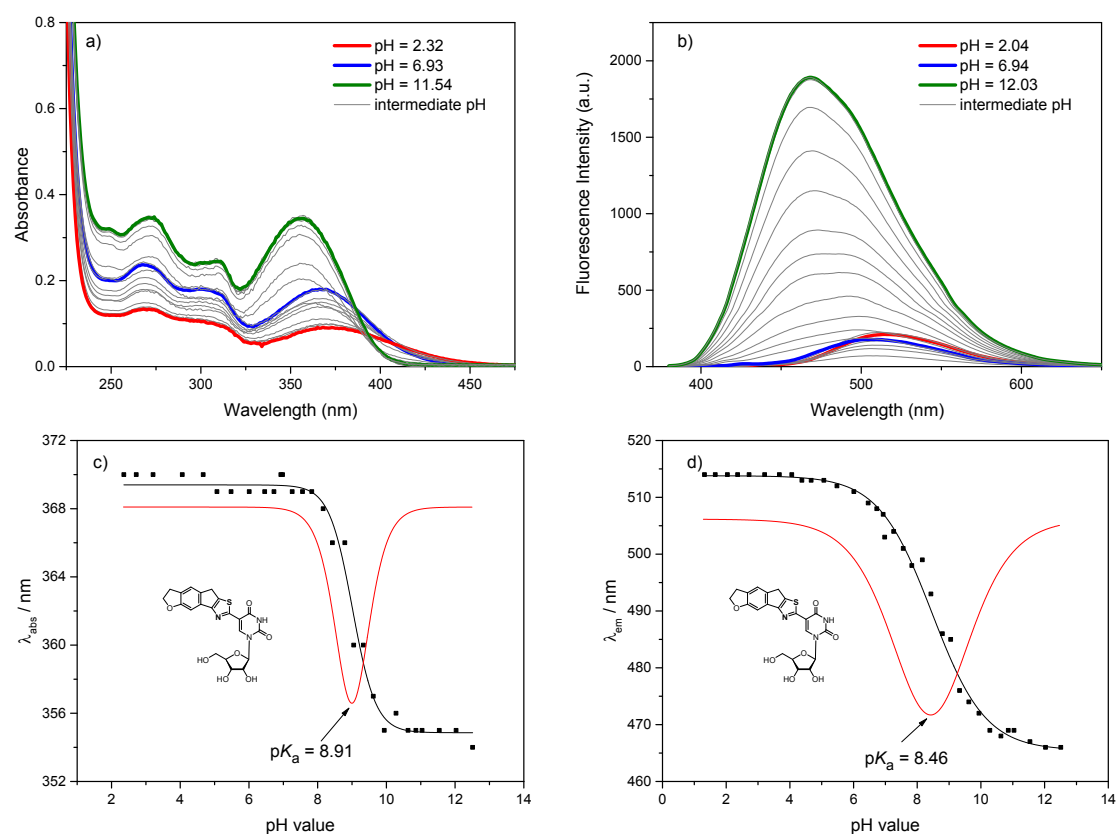

**Figure S23.** pH-dependent UV spectra and fluorescence spectra of **7g** measured in 0.1 M sodium phosphate buffer with (a) UV-spectra at pH values from 2.32 to 11.54, (b) emission spectra at pH values from 2.04 to 12.03. (c) Graph of the absorbance against pH value (black line) and its first derivative (line marked in red) using data from (a). (d) Graph of the fluorescence emission against pH value (black line) and its first derivative (line marked in red) using data from (b).

# Absorption and fluorescence emission spectroscopy for **7h**

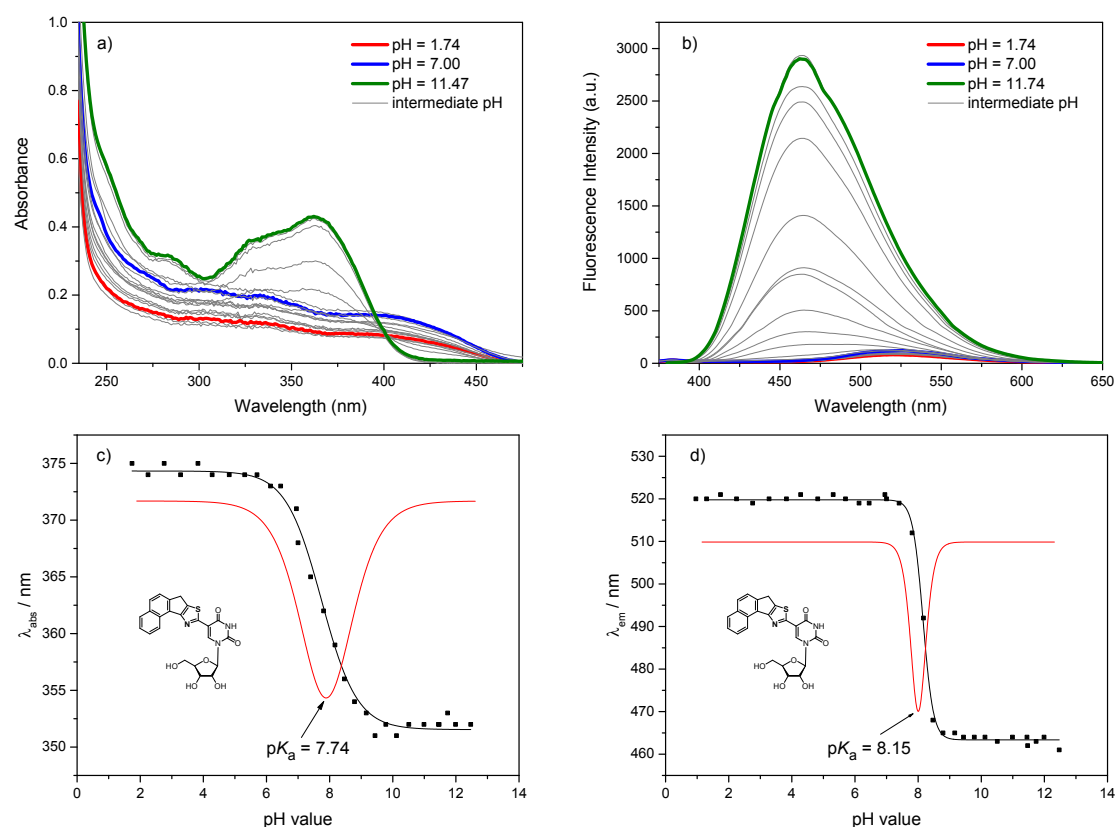

**Figure S24.** pH-Dependent UV spectra and fluorescence spectra of **7h** measured in 0.1 M sodium phosphate buffer with (a) UV-spectra at pH values from 1.71 to 11.47, (b) emission spectra at pH values from 1.71 to 11.47. (c) Graph of the absorbance against pH value (black line) and its first derivative (line marked in red) using data from (a). (d) Graph of the fluorescence emission against pH value (black line) and its first derivative (line marked in red) using data from (b).

# Absorption and fluorescence emission spectroscopy for **7j**

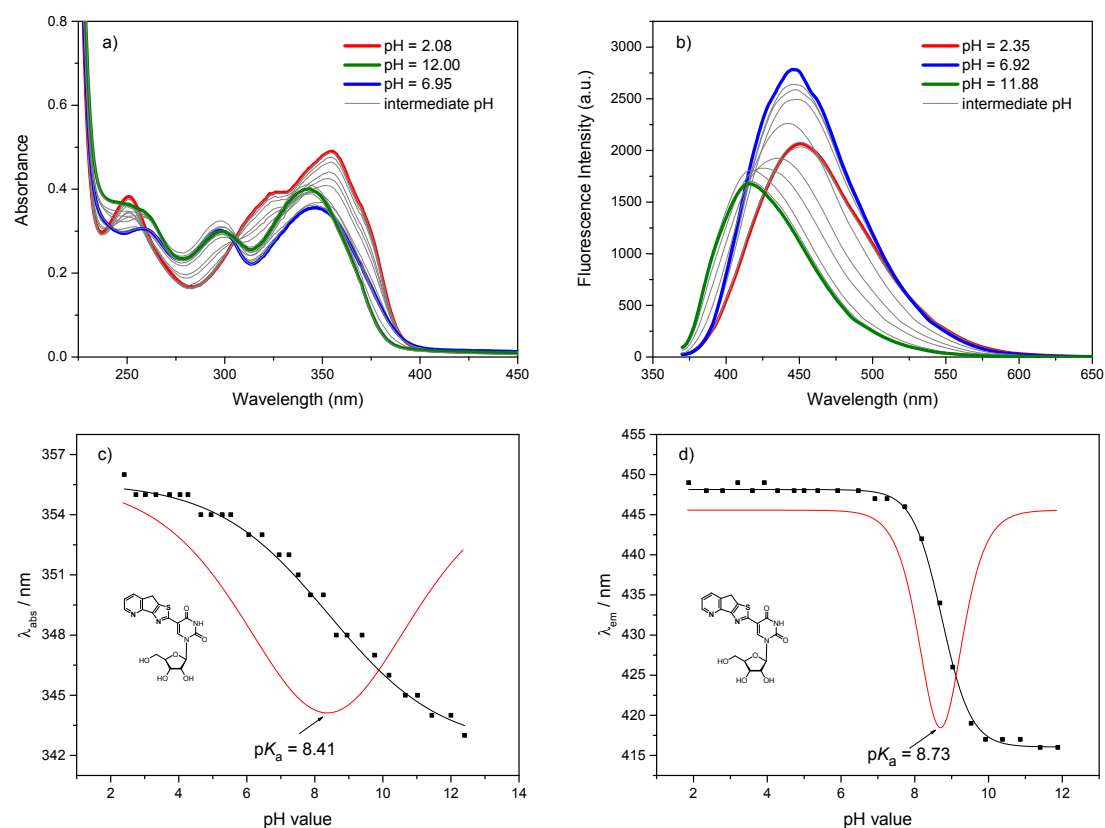

**Figure S25.** pH-Dependent UV spectra and fluorescence spectra of **7j** measured in 0.1 M sodium phosphate buffer with (a) UV-spectra at pH values from 2.08 to 12.00, (b) emission spectra at pH values from 2.35 to 11.88. (c) Graph of the absorbance against pH value (black line) and its first derivative (lines marked in red) using data from (a). (d) Graph of the fluorescence emission against pH value (black line) and its first derivative (lines marked in red) using data from (b).

# Absorption and fluorescence emission spectroscopy for **7k**

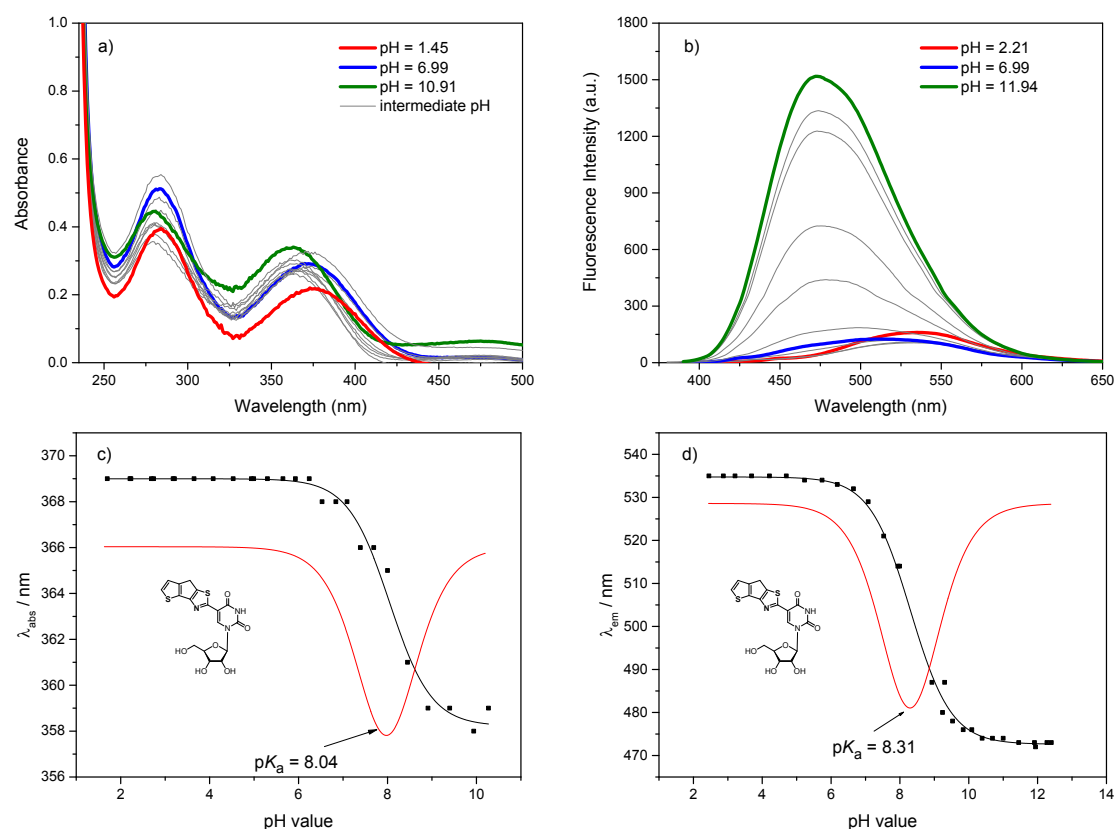

**Figure S26.** pH-Dependent UV spectra and fluorescence spectra of **7k** measured in 0.1 M sodium phosphate buffer with (a) UV-spectra at pH values from 1.45 to 10.91, (b) emission spectra at pH values from 2.21 to 11.94. (c) Graph of the absorbance against pH value (black line) and its first derivative (line marked in red) using data from (a). (d) Graph of the fluorescence emission against pH value (black line) and its first derivative (line marked in red) using data from (b).

# Absorption and fluorescence emission spectroscopy for **7I**

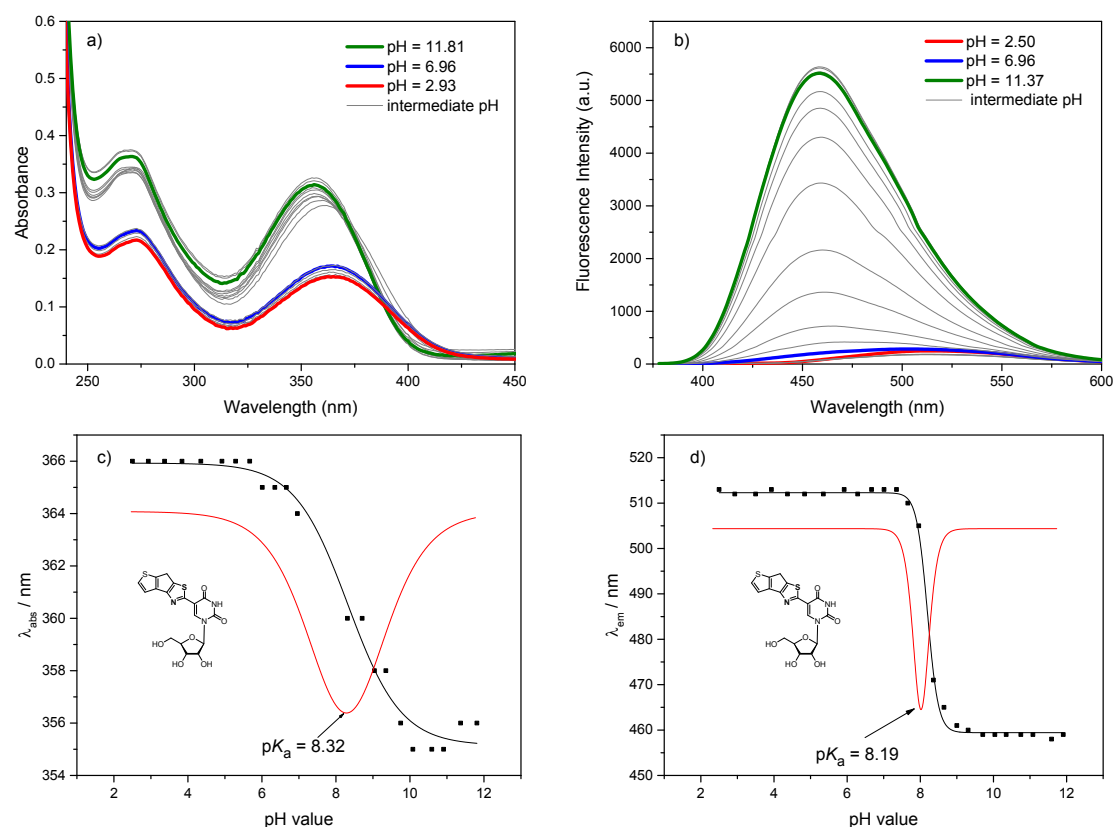

**Figure S27.** pH-Dependent UV spectra and fluorescence spectra of **7I** measured in 0.1 M sodium phosphate buffer with (a) UV-spectra at pH values from 2.93 to 11.81, (b) emission spectra at pH values from 2.50 to 11.37. (c) Graph of the absorbance against pH value (black line) and its first derivative (line marked in red) using data from (a). (d) Graph of the fluorescence emission against pH value (black line) and its first derivative (line marked in red) using data from (b).

## Absorption and fluorescence emission spectroscopy for **7m**

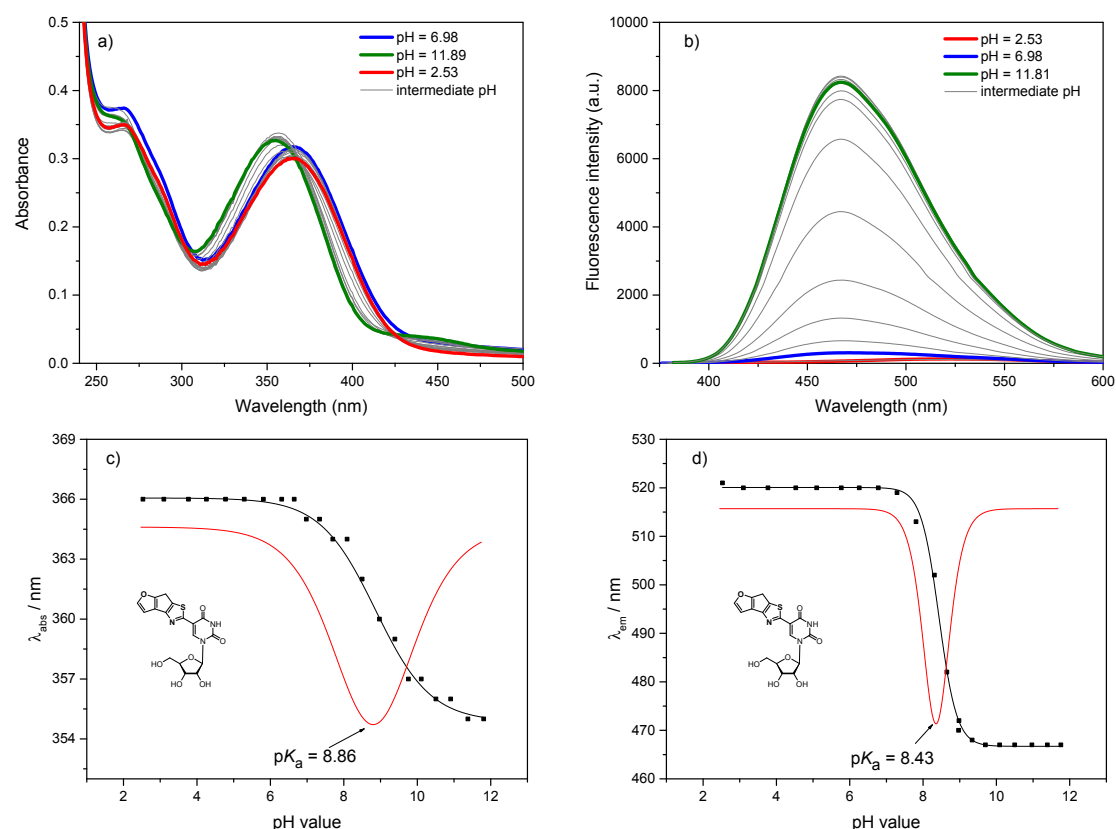

**Figure S28.** pH-Dependent UV spectra and fluorescence spectra of **7m** measured in 0.1 M sodium phosphate buffer with (a) UV-spectra at pH values from 2.53 to 11.89, (b) emission spectra at pH values from 2.53 to 11.81. (c) Graph of the absorbance against pH value (black line) and its first derivative (line marked in red) using data from (a). (d) Graph of the fluorescence emission against pH value (black line) and its first derivative (line marked in red) using data from (b).

## LC-ESI-MS chromatograms and NMR spectra of new compounds

### LC-ESI-MS chromatograms of compound 4

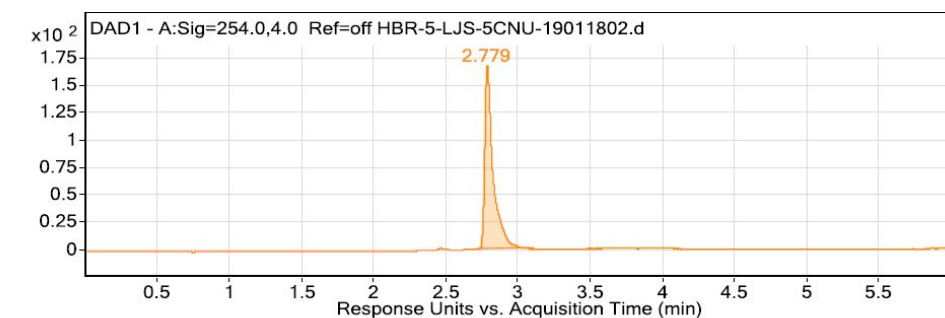

Integration Peak List

| Peak | Start | RT    | End   | Height | Area   | AreaSumPercent |
|------|-------|-------|-------|--------|--------|----------------|
| 1    | 2.716 | 2.779 | 3.111 | 167.15 | 681.84 | 100.00         |

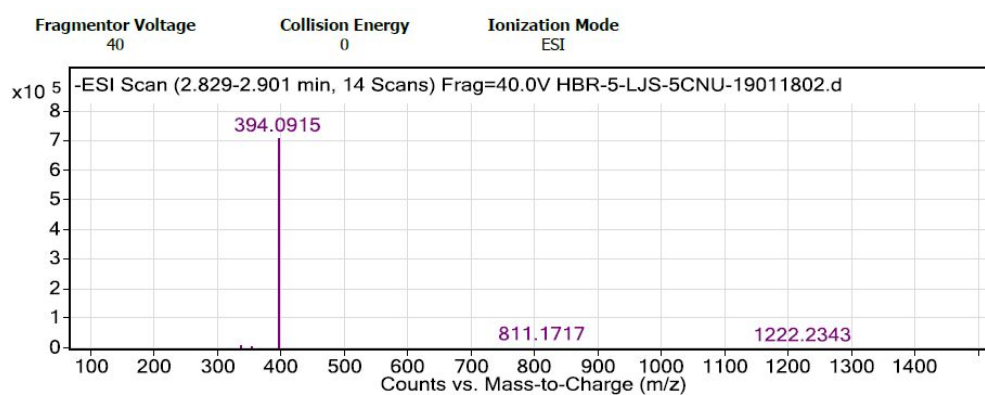

### <sup>1</sup>H-NMR spectra of compound 4

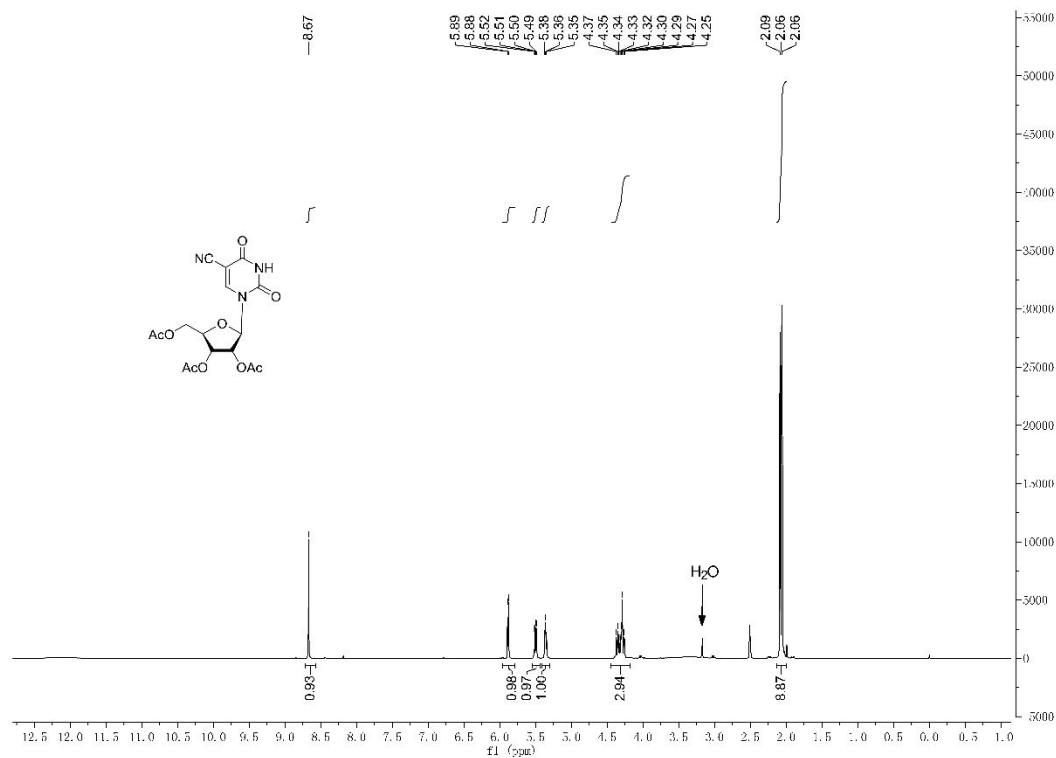

<sup>13</sup>C-NMR spectra of compound **4**

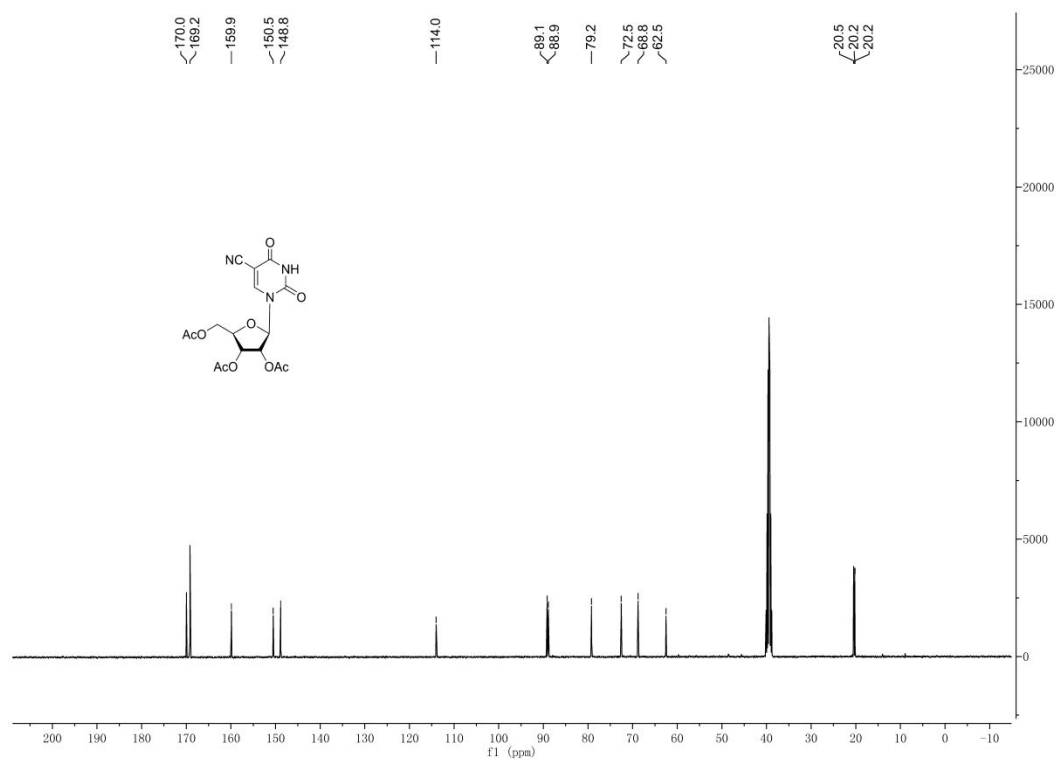



# LC-ESI-MS chromatograms of compound 5

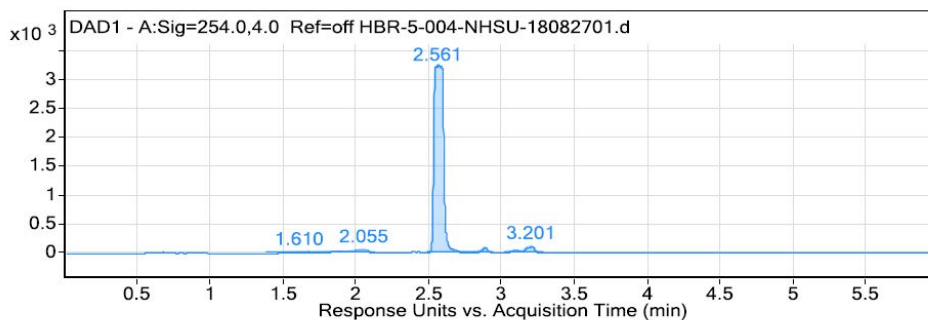

Integration Peak List

| Peak | Start | RT    | End   | Height  | Area     | AreaSumPercent |
|------|-------|-------|-------|---------|----------|----------------|
| 1    | 1.382 | 1.61  | 1.675 | 16.2    | 155.83   | 0.93           |
| 2    | 1.675 | 1.859 | 1.892 | 22.71   | 251.75   | 1.51           |
| 3    | 1.892 | 2.055 | 2.128 | 62.49   | 480.72   | 2.88           |
| 4    | 2.493 | 2.561 | 2.813 | 3277.27 | 14859.71 | 88.90          |
| 5    | 2.813 | 2.881 | 2.94  | 93.26   | 293.78   | 1.76           |
| 6    | 3.024 | 3.091 | 3.124 | 46.42   | 172.17   | 1.03           |
| 7    | 3.124 | 3.201 | 3.286 | 120.47  | 502.04   | 3.00           |

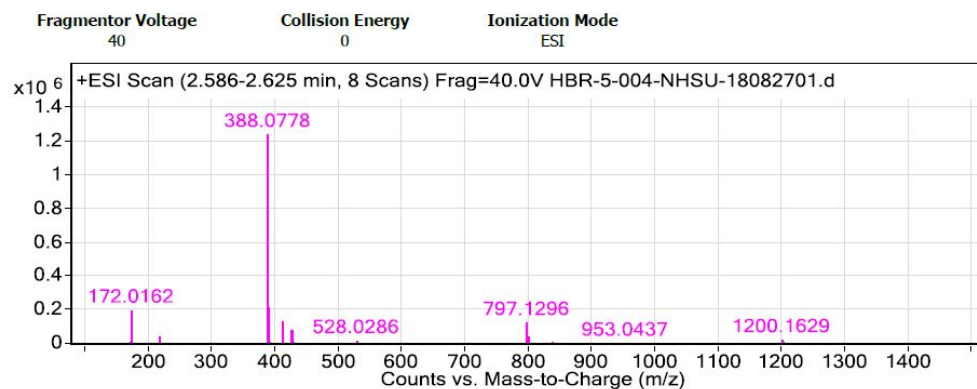

Chemical structure of compound 10 is shown. The spectrum displays peaks corresponding to the structure, with integration values and chemical shift values (ppm) indicated.

Chemical structure of compound 10 is shown above the  $^{13}\text{C}$  NMR spectrum. The spectrum displays peaks at the following chemical shifts (ppm): 191.3, 169.4, 169.3, 162.4, 150.2, 149.2, 110.3, 87.5, 83.6, 73.3, 71.1, 60.8, 20.4, and 20.3.

<sup>1</sup>H-NMR spectra of compound **6c**

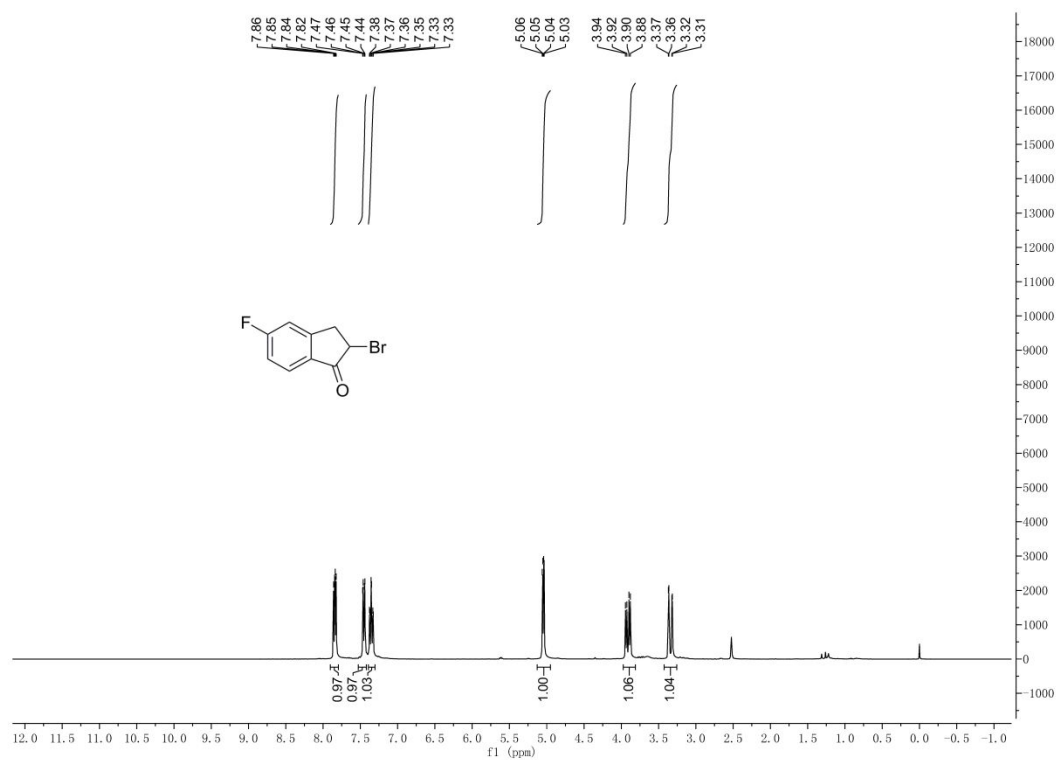

<sup>1</sup>H-NMR spectra of compound **6e**

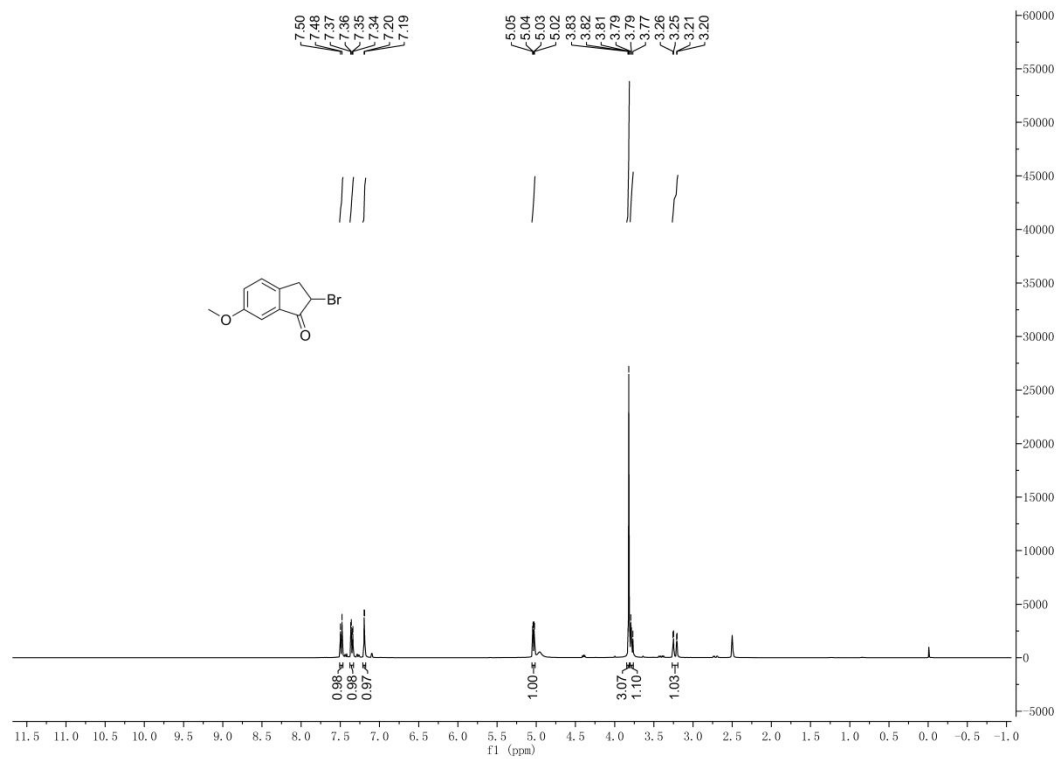

<sup>1</sup>H-NMR spectra of compound **6f**

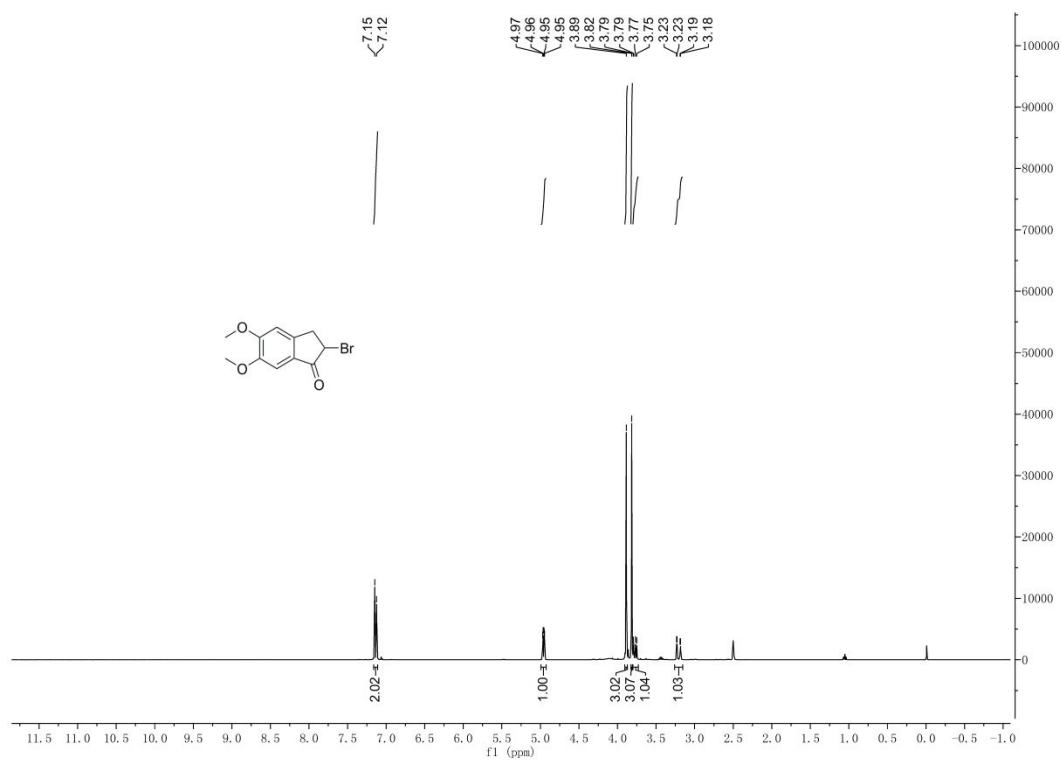

ESI-MS chromatograms of compound **6g**

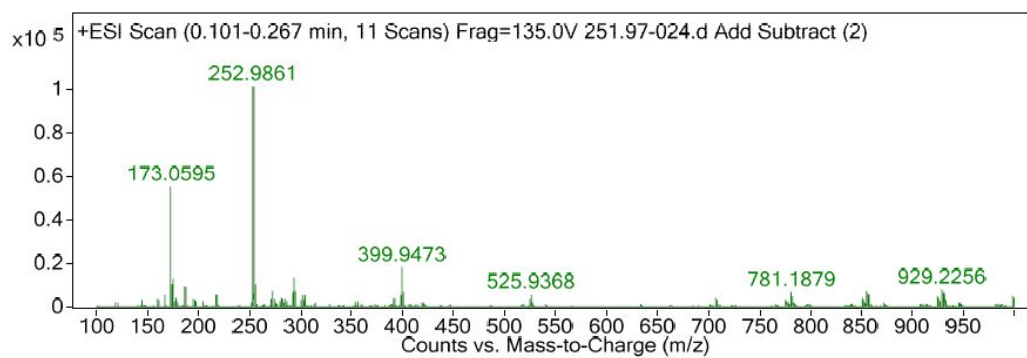

<sup>1</sup>H-NMR spectra of compound **6g**

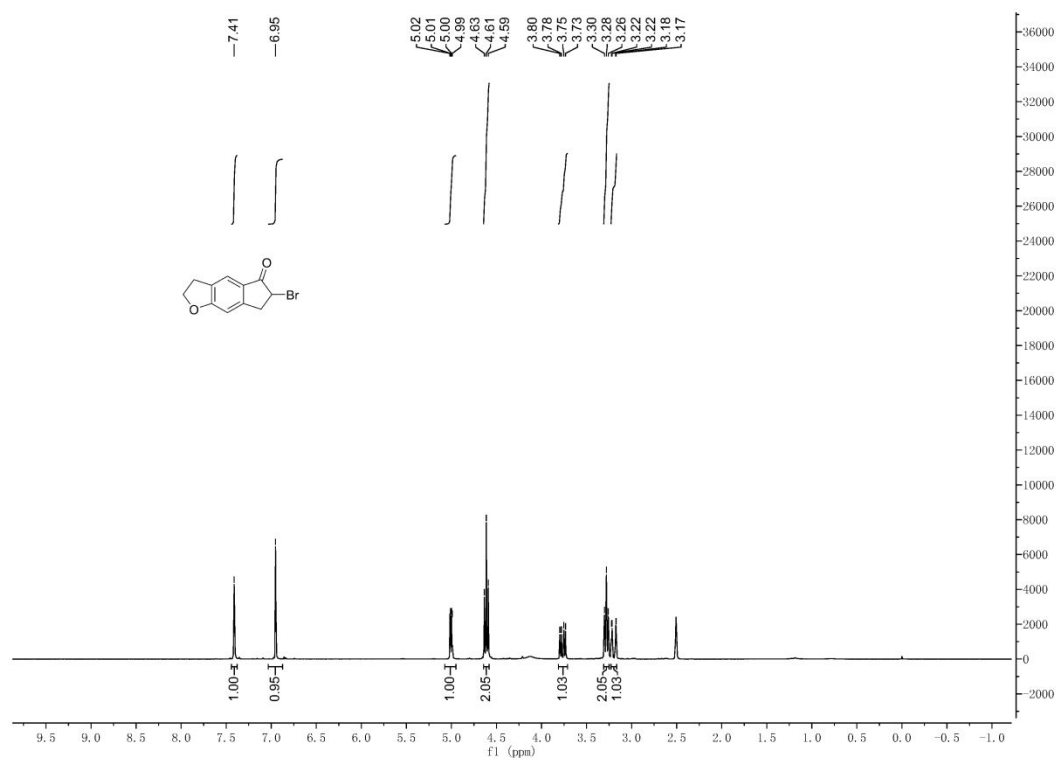

<sup>13</sup>C-NMR spectra of compound **6g**

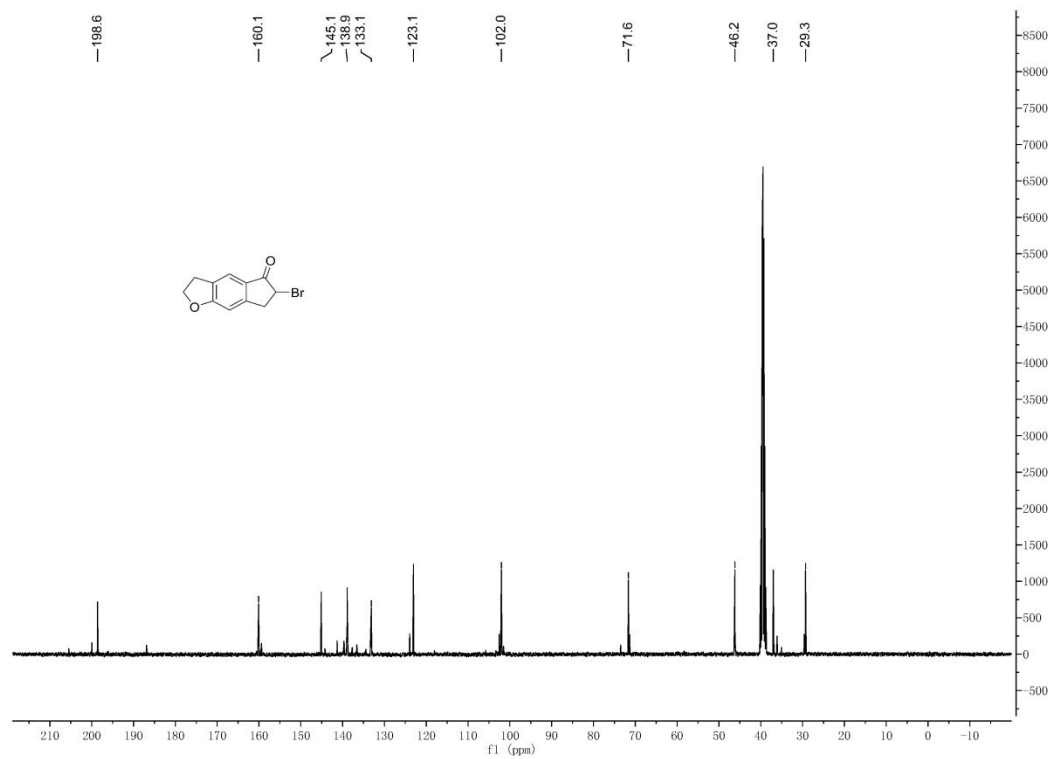

# ESI-MS chromatograms of compound **6h**

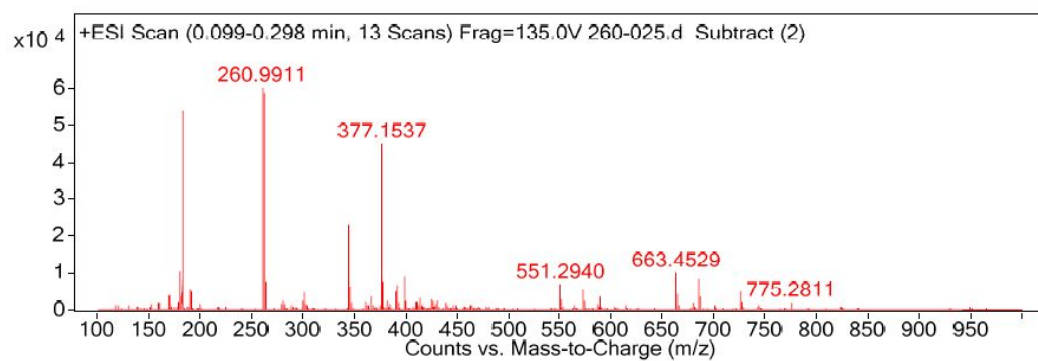

# <sup>1</sup>H-NMR spectra of compound **6h**

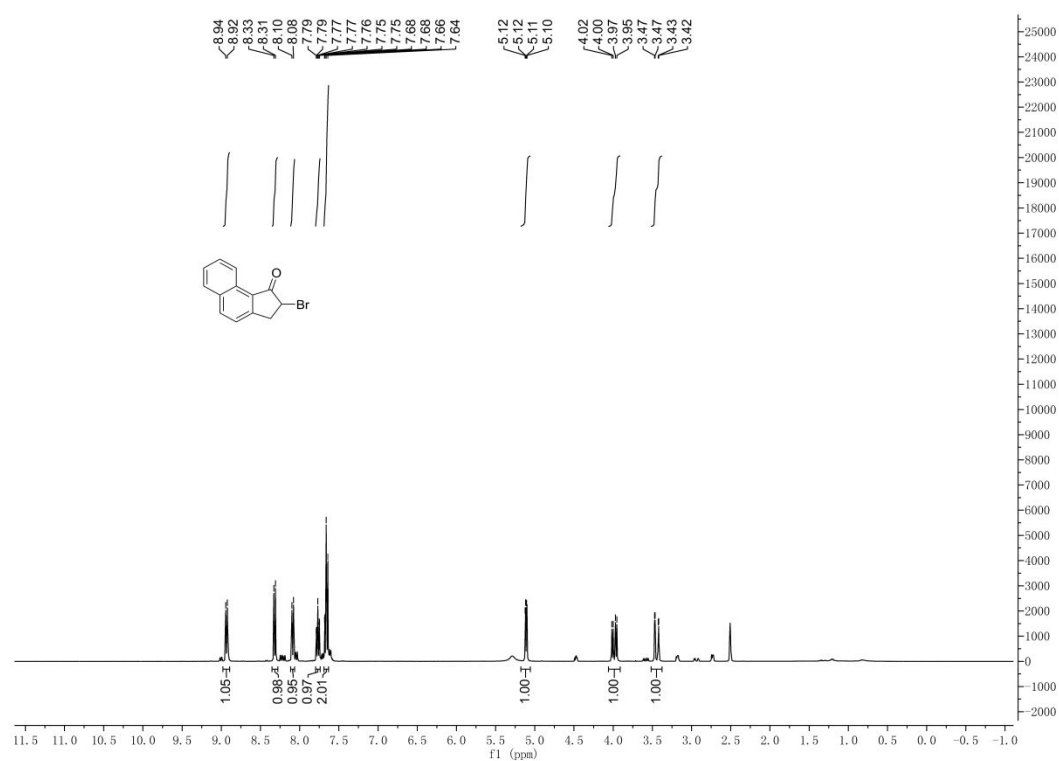

<sup>13</sup>C-NMR spectra of compound **6h**

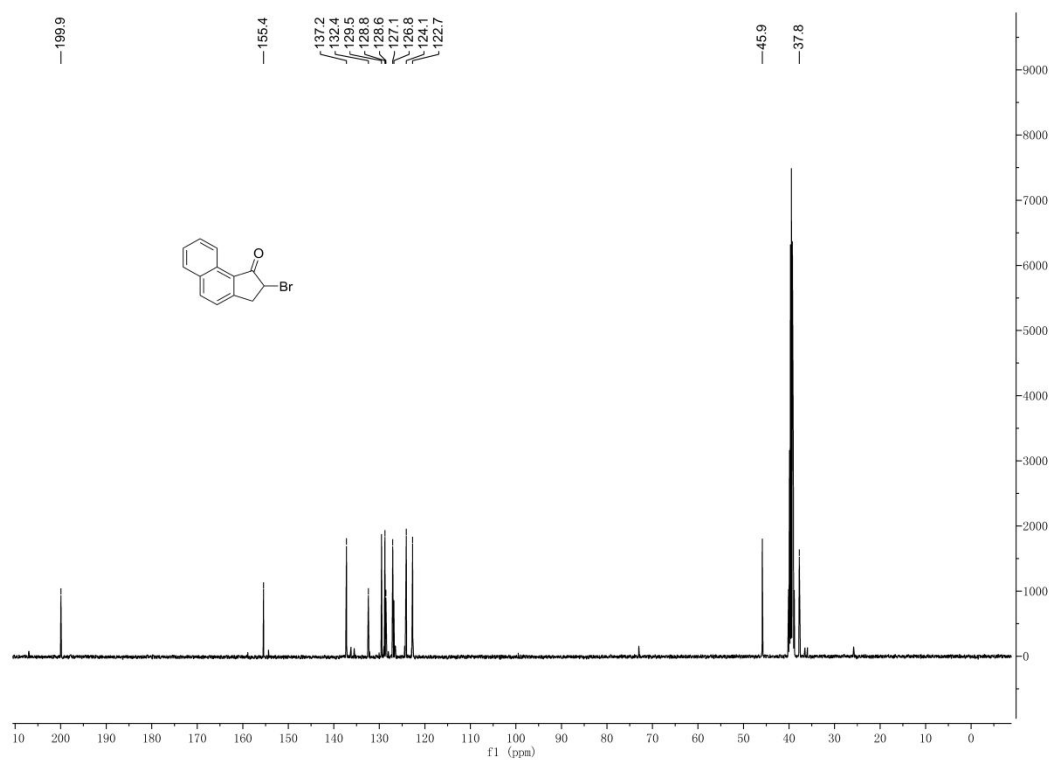

<sup>1</sup>H-NMR spectra of compound **6i**

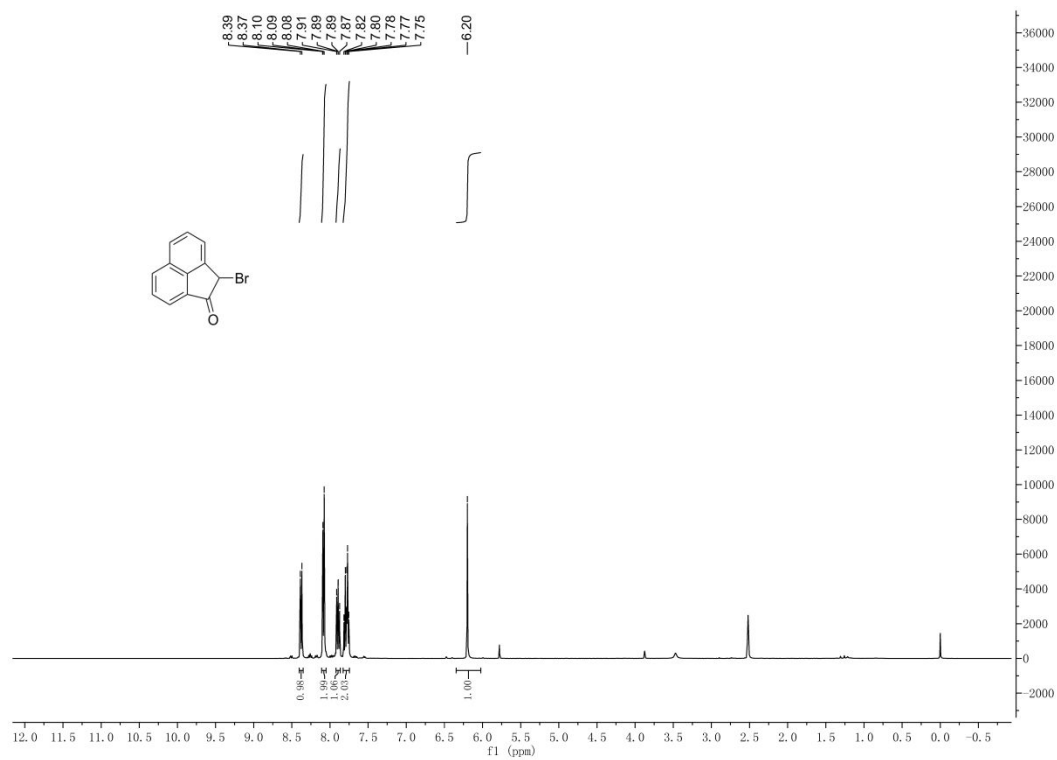

# ESI-MS chromatograms of compound **6k**

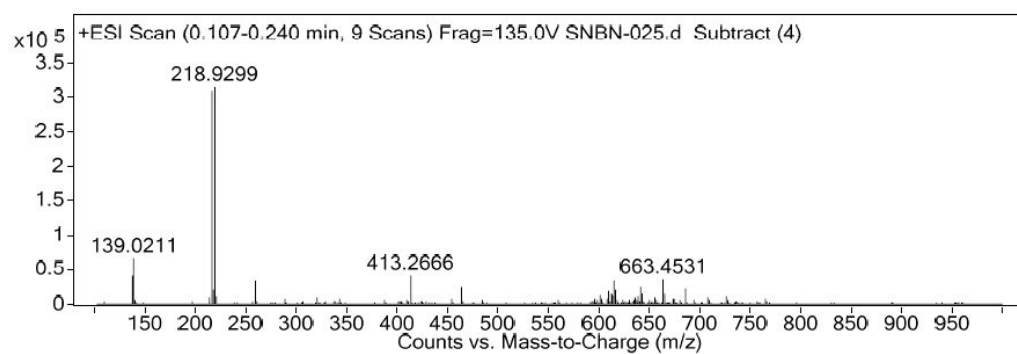

## <sup>1</sup>H-NMR spectra of compound **6k**

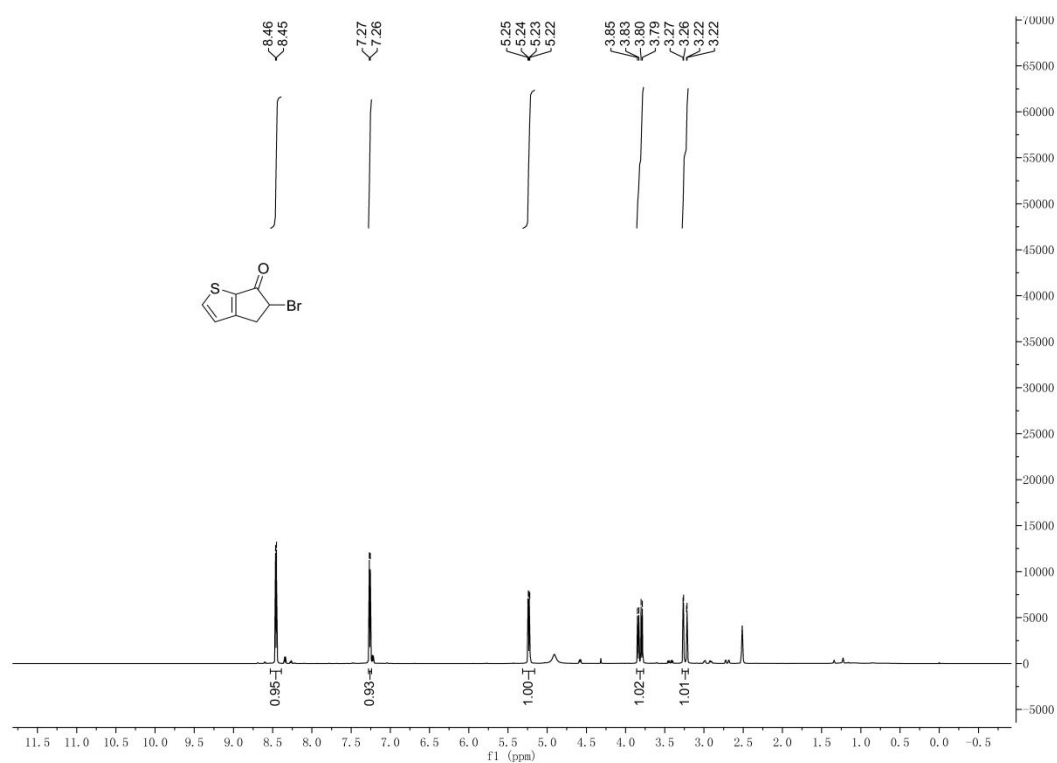



<sup>13</sup>C-NMR spectra of compound **6k**

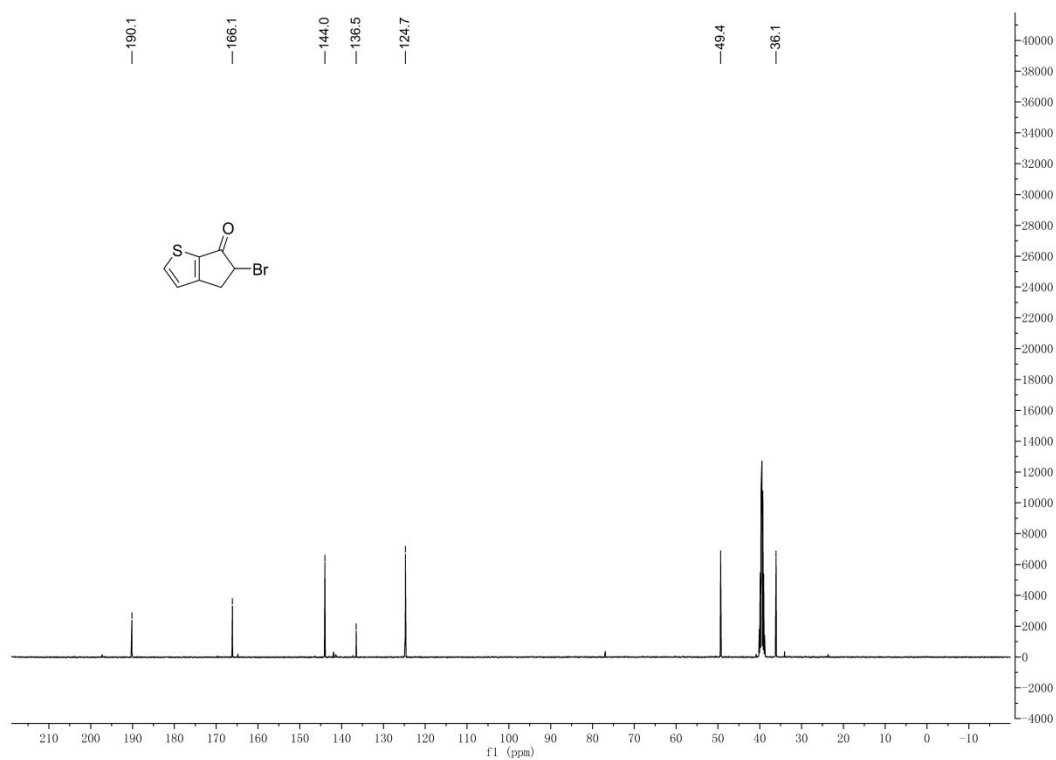

ESI-MS chromatograms of compound **6l**

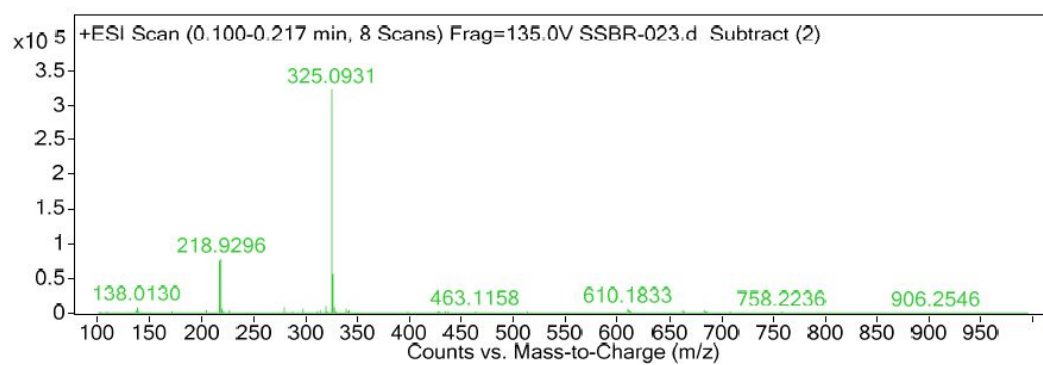

<sup>1</sup>H-NMR spectra of compound **6I**

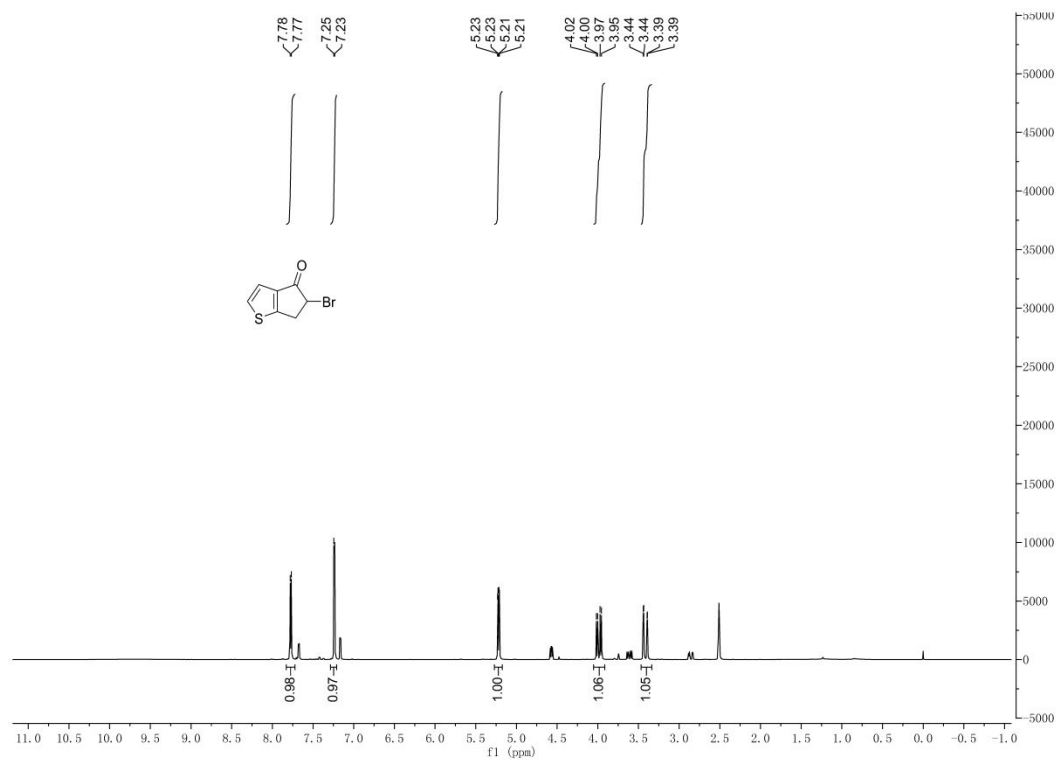

<sup>13</sup>C-NMR spectra of compound **6I**

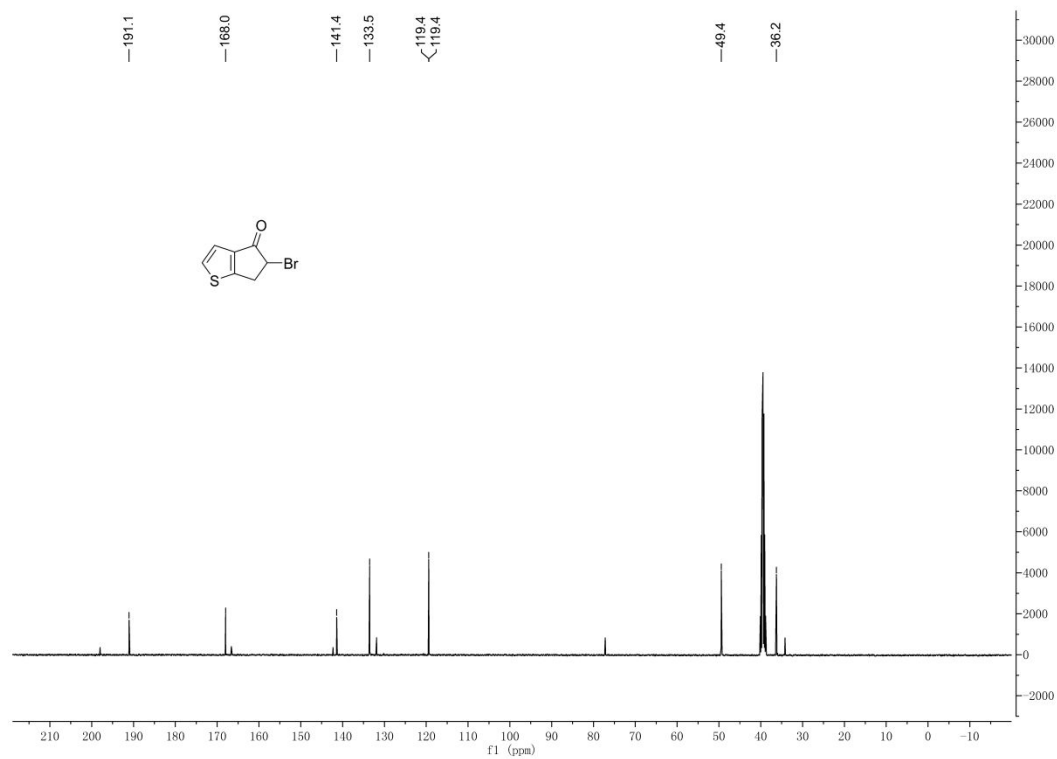

# ESI-MS chromatograms of compound **6m**

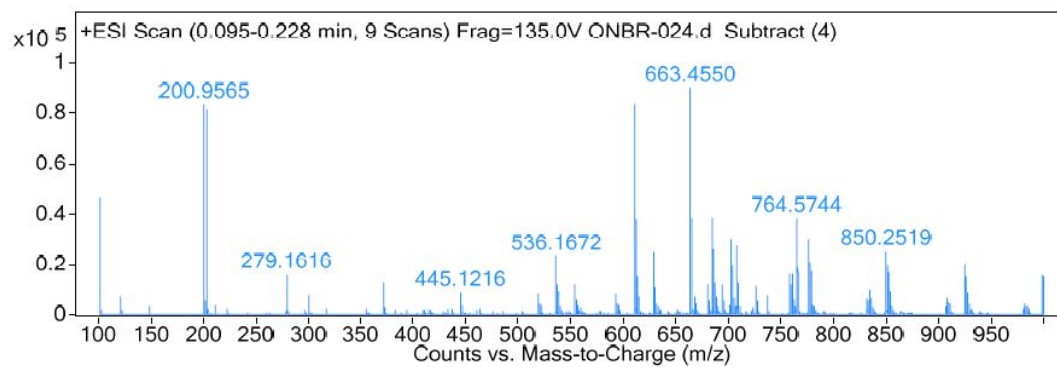

## <sup>1</sup>H-NMR spectra of compound **6m**

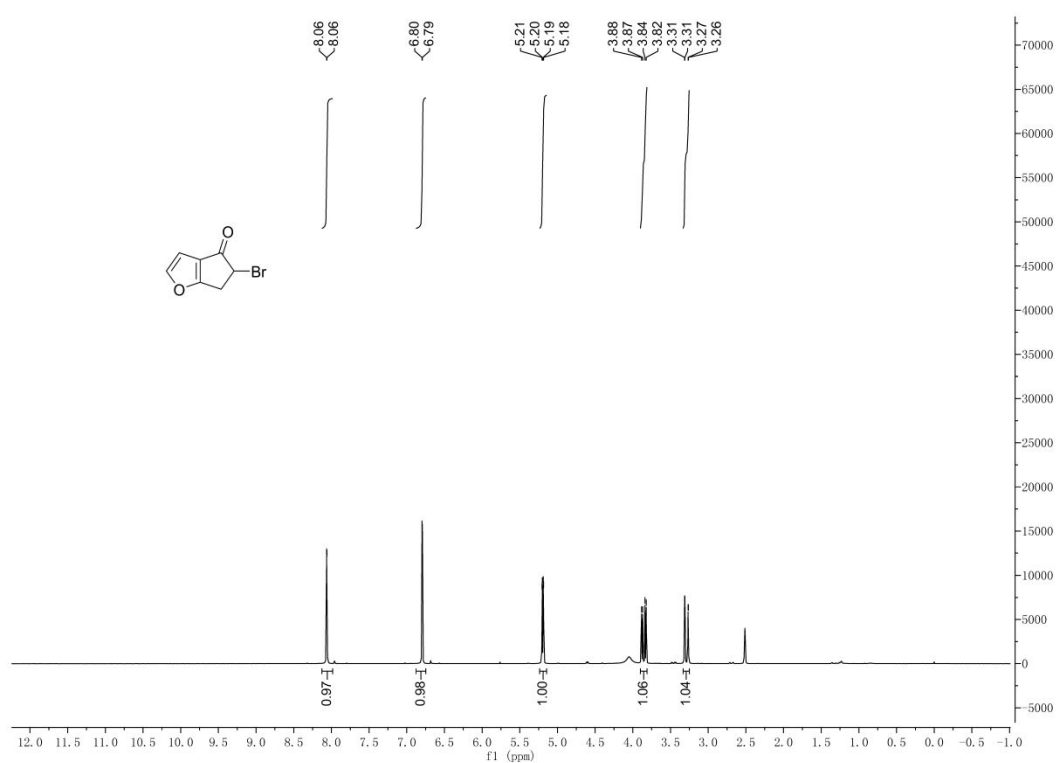

<sup>13</sup>C-NMR spectra of compound **6m**

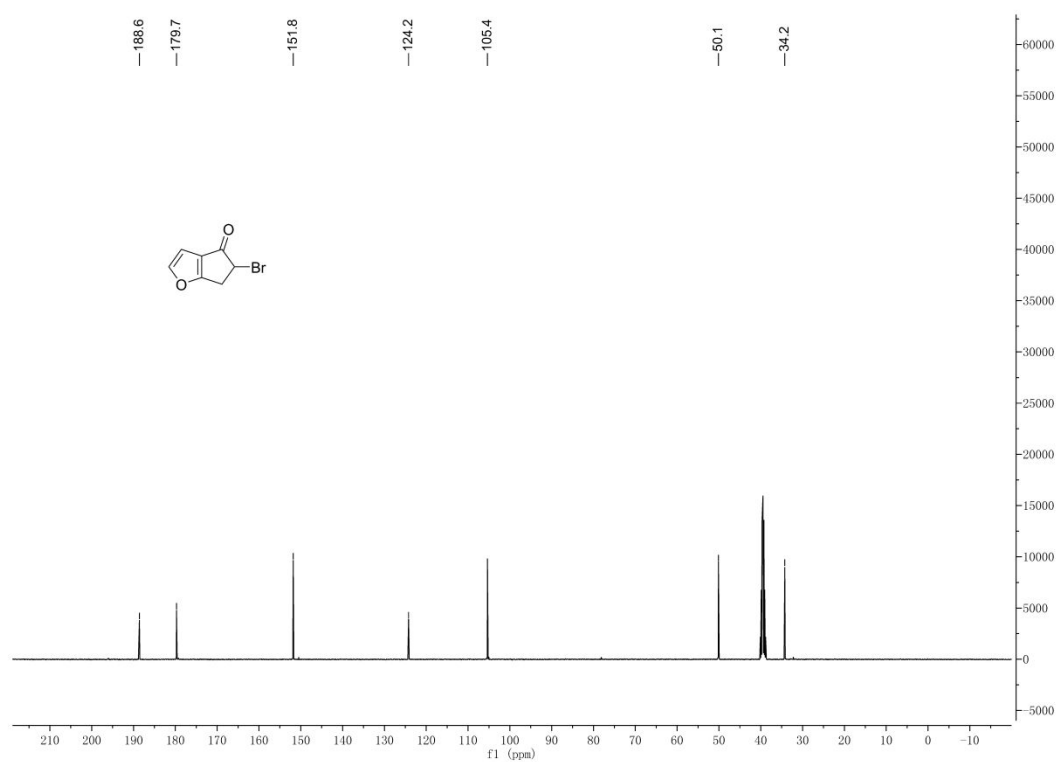

# LC-ESI-MS chromatograms of compound **7a**

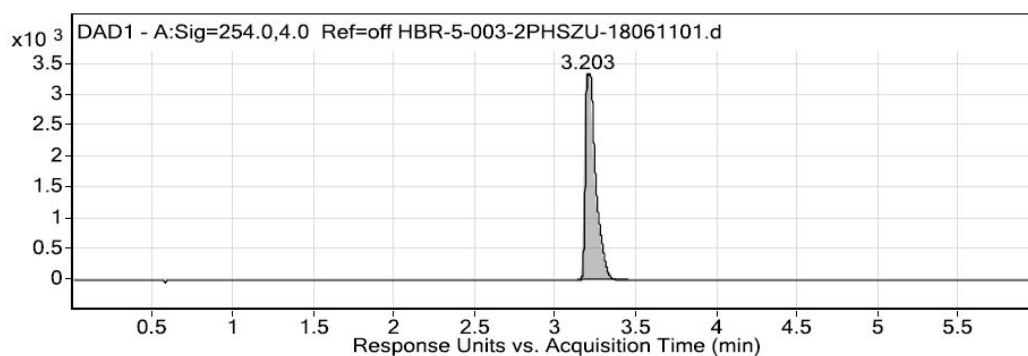

## Integration Peak List

| Peak | Start | RT    | End   | Height  | Area     | AreaSumPercent |
|------|-------|-------|-------|---------|----------|----------------|
| 1    | 3.141 | 3.203 | 3.451 | 3339.96 | 14858.05 | 100.00         |

Fragmentor Voltage: 40  
Collision Energy: 0  
Ionization Mode: ESI

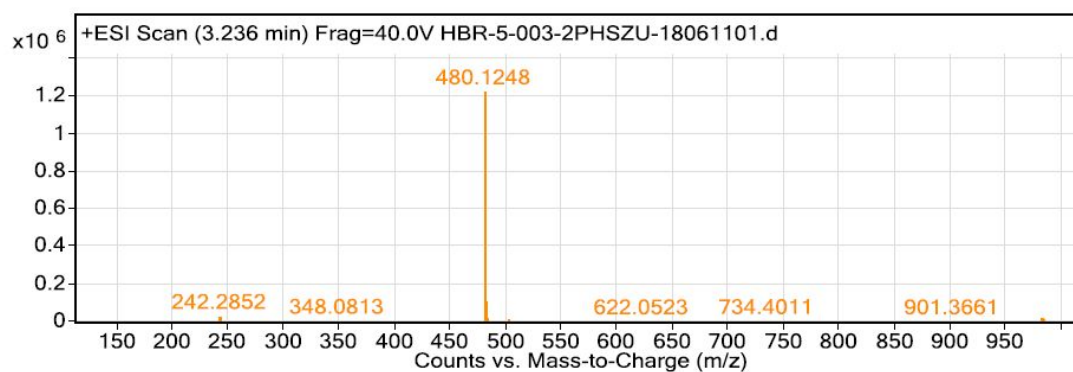

# <sup>1</sup>H-NMR spectra of compound **7a**

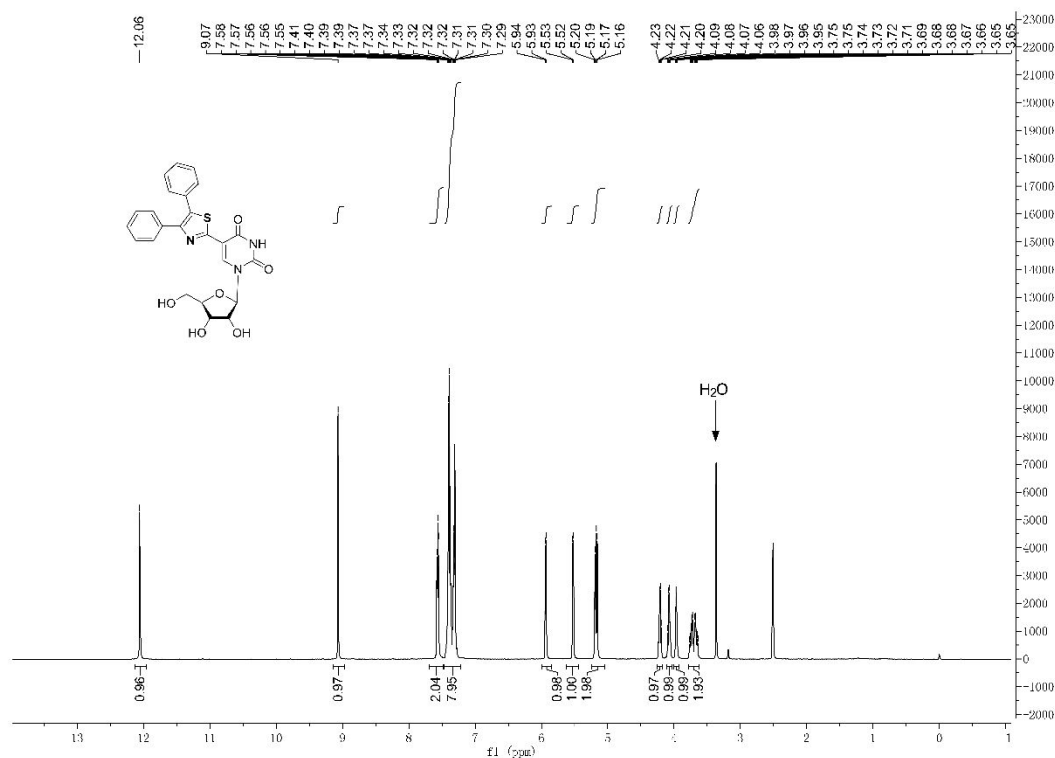

<sup>13</sup>C-NMR spectra of compound **7a**

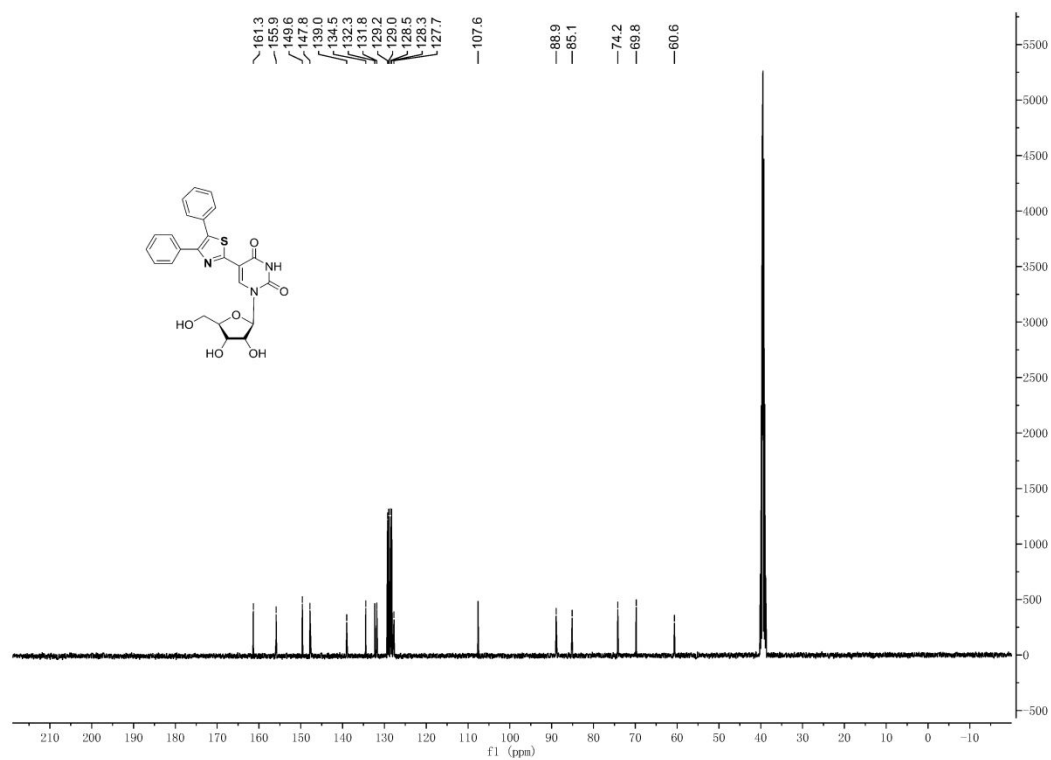

# LC-ESI-MS chromatograms of compound **7b**

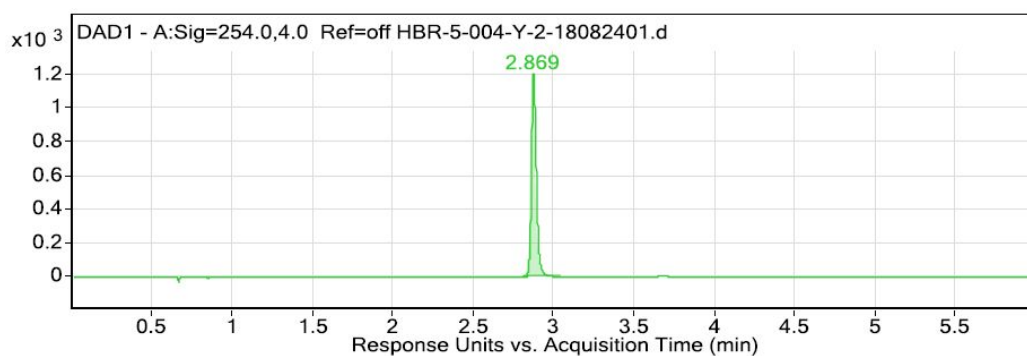

Integration Peak List

| Peak | Start | RT    | End   | Height  | Area    | AreaSumPercent |
|------|-------|-------|-------|---------|---------|----------------|
| 1    | 2.814 | 2.869 | 3.041 | 1204.78 | 2567.83 | 100.00         |

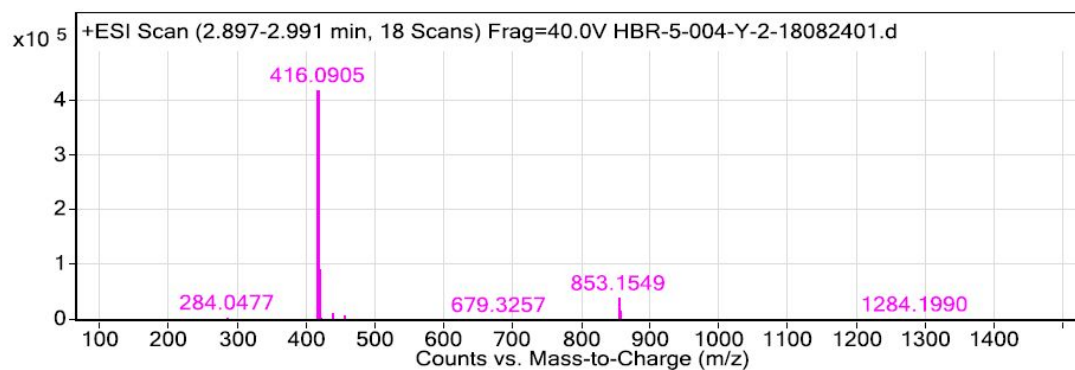

## <sup>1</sup>H-NMR spectra of compound **7b**

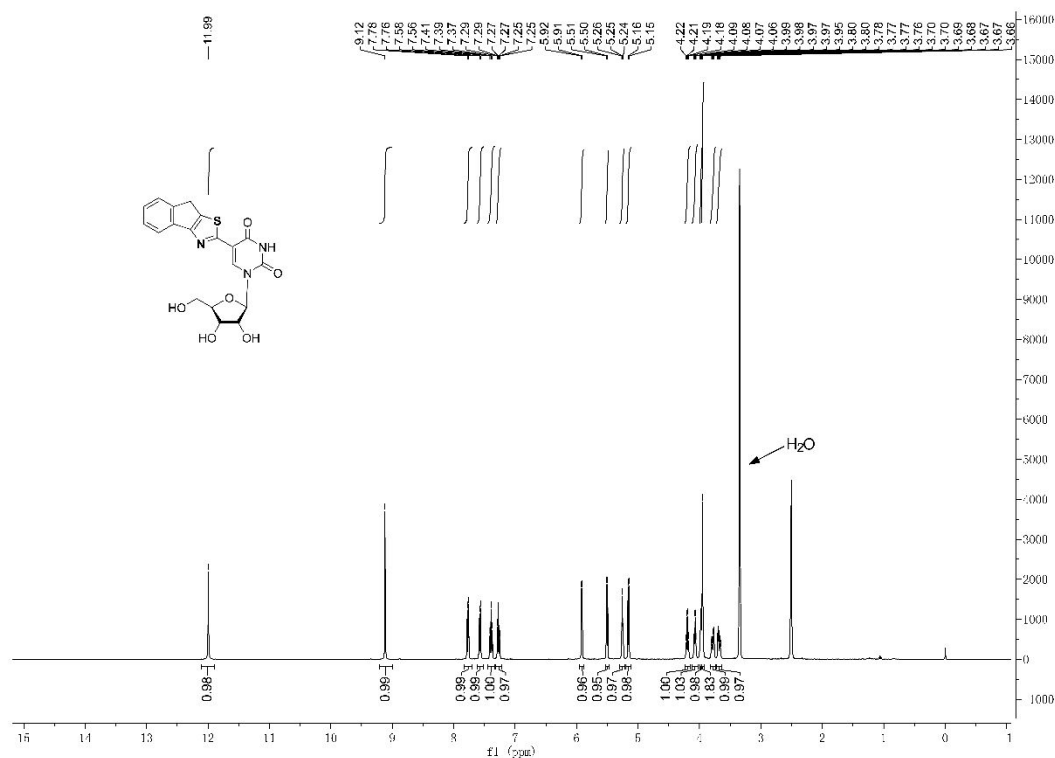

<sup>13</sup>C-NMR spectra of compound **7b**

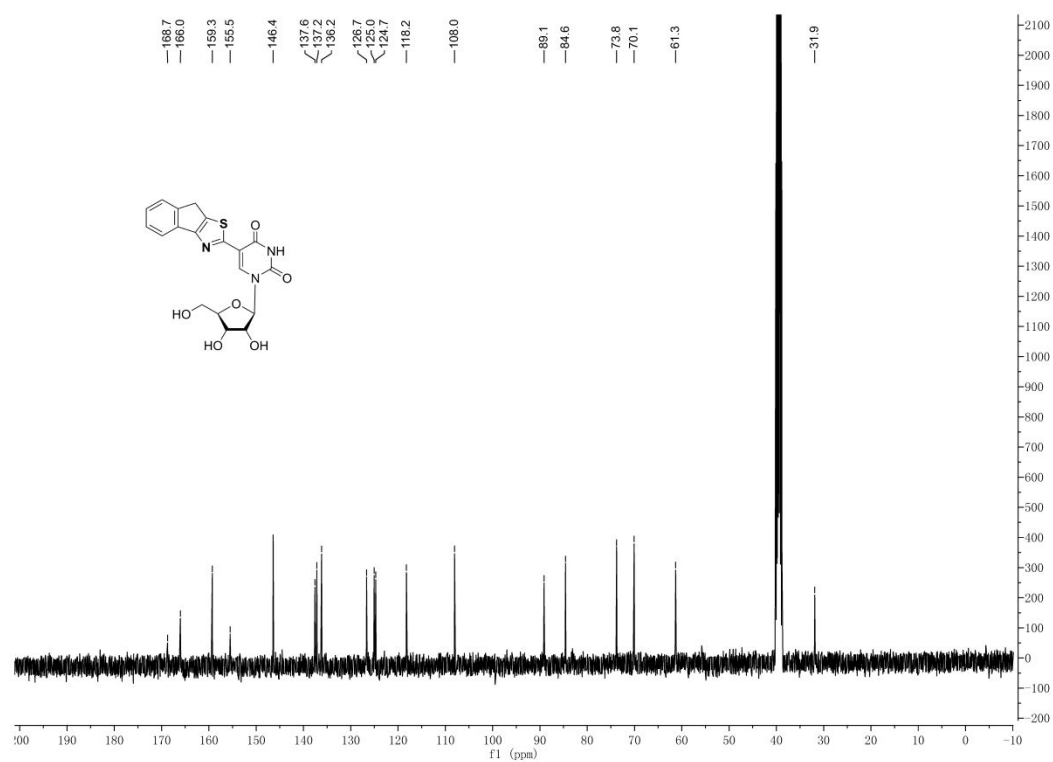



# LC-ESI-MS chromatograms of compound **7c**

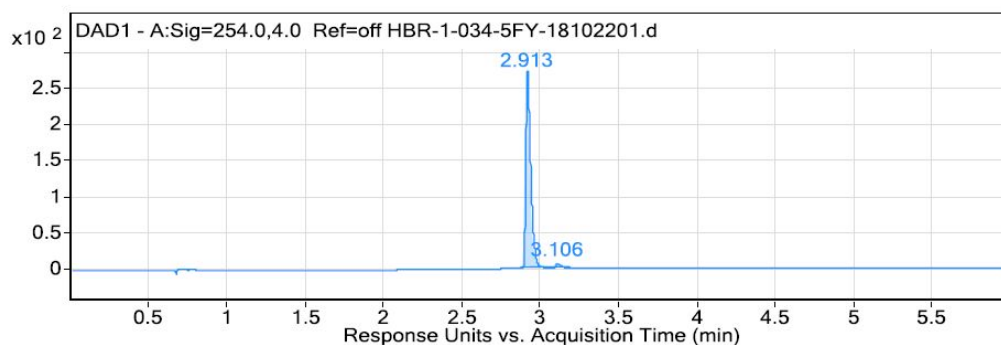

## Integration Peak List

| Peak | Start | RT    | End   | Height | Area   | AreaSumPercent |
|------|-------|-------|-------|--------|--------|----------------|
| 1    | 2.875 | 2.913 | 3.072 | 273.79 | 581.41 | 97.43          |
| 2    | 3.072 | 3.106 | 3.188 | 6.21   | 15.35  | 2.57           |

Fragmentor Voltage: 40  
Collision Energy: 0  
Ionization Mode: ESI

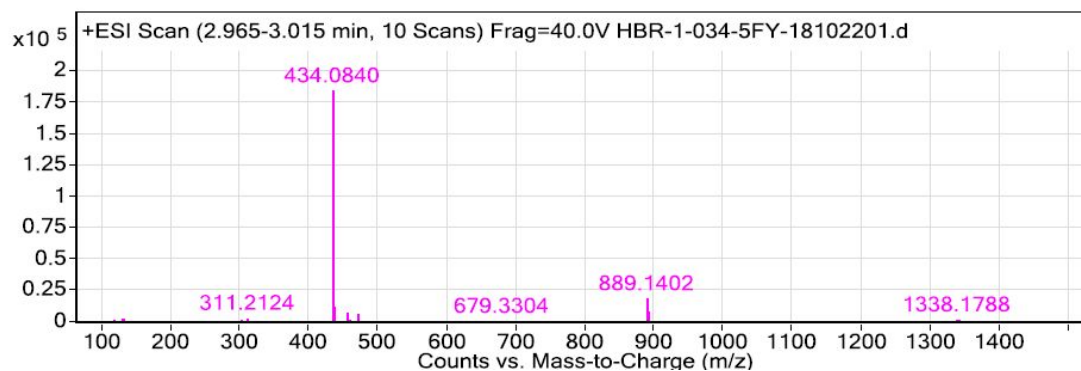

# <sup>1</sup>H-NMR spectra of compound **7c**

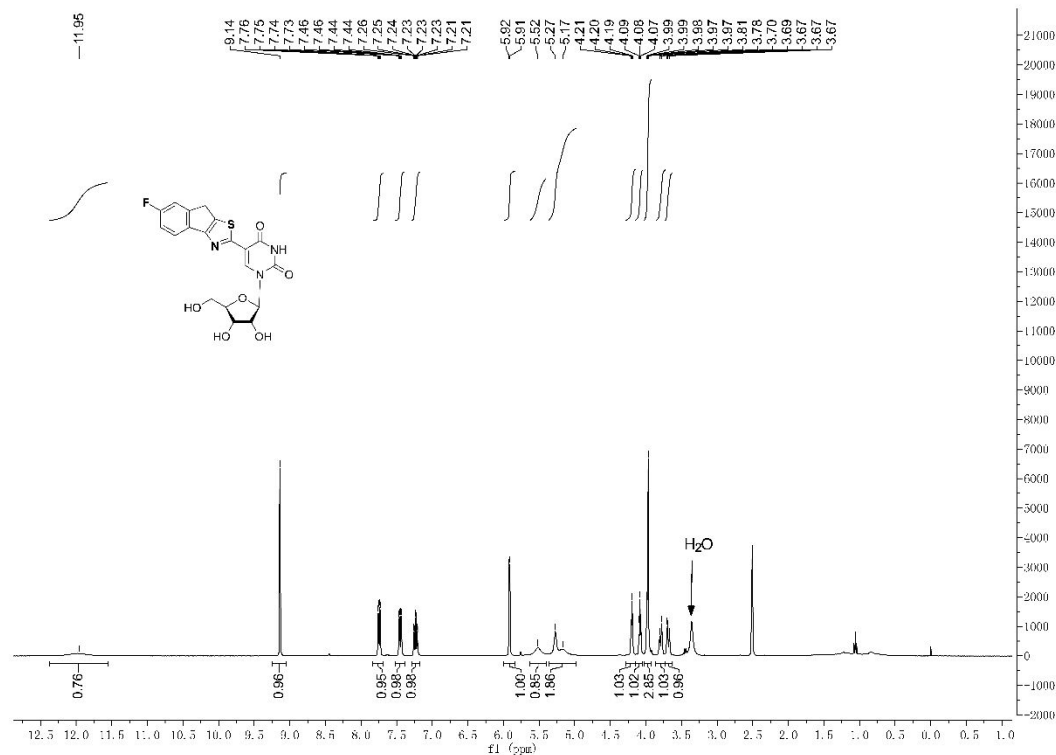

<sup>13</sup>C-NMR spectra of compound **7c**

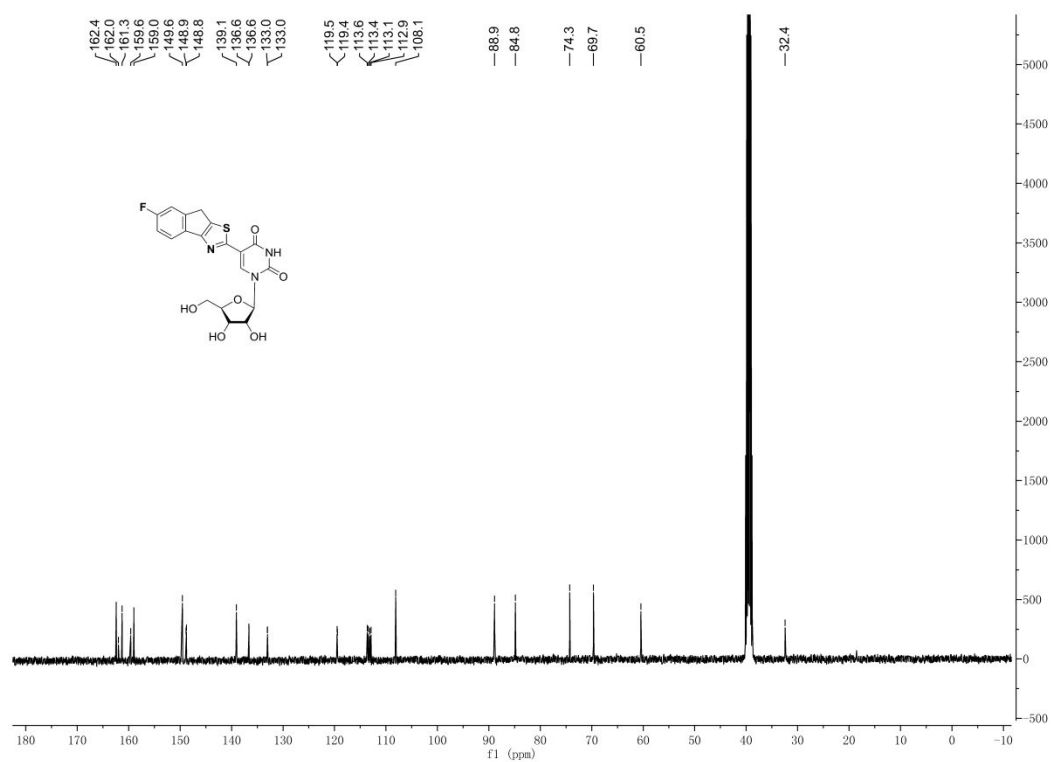

# LC-ESI-MS chromatograms of compound **7d**

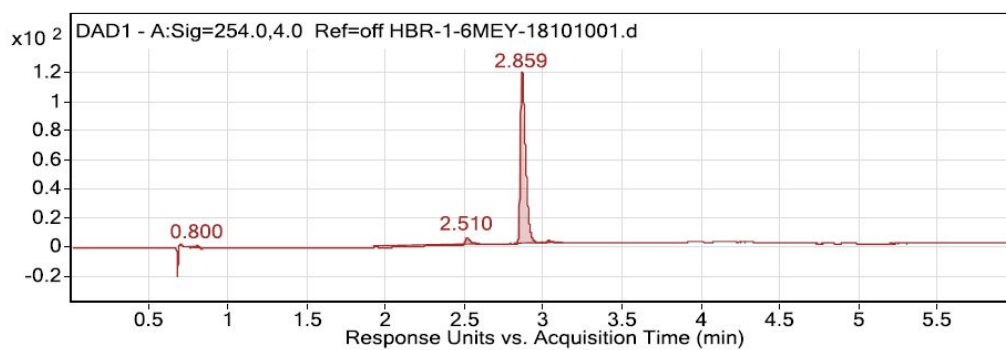

Integration Peak List

| Peak | Start | RT    | End   | Height | Area   | AreaSumPercent |
|------|-------|-------|-------|--------|--------|----------------|
| 1    | 0.76  | 0.8   | 0.828 | 2.07   | 5.72   | 1.86           |
| 2    | 1.921 | 2.51  | 2.593 | 5.18   | 18.61  | 6.04           |
| 3    | 2.818 | 2.859 | 2.991 | 118.52 | 275.94 | 89.58          |
| 4    | 2.991 | 3.029 | 3.121 | 2.14   | 7.77   | 2.52           |

Fragmentor Voltage

40

Collision Energy

0

Ionization Mode

ESI

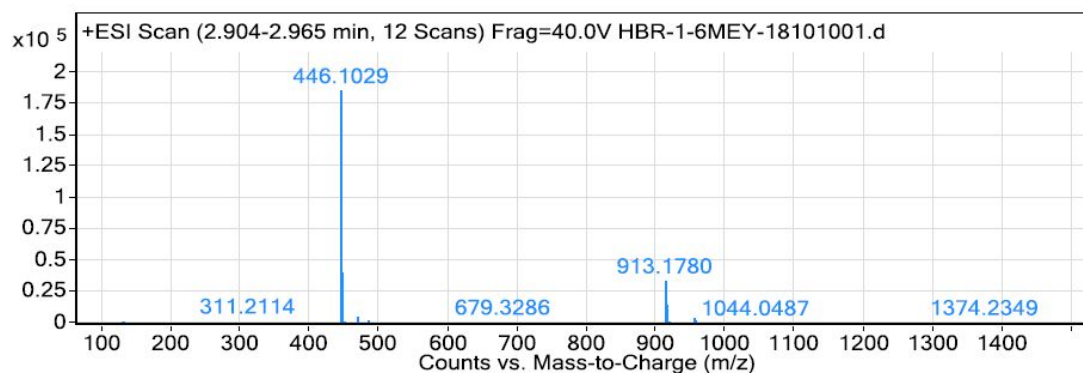

<sup>1</sup>H-NMR spectra of compound **7d**

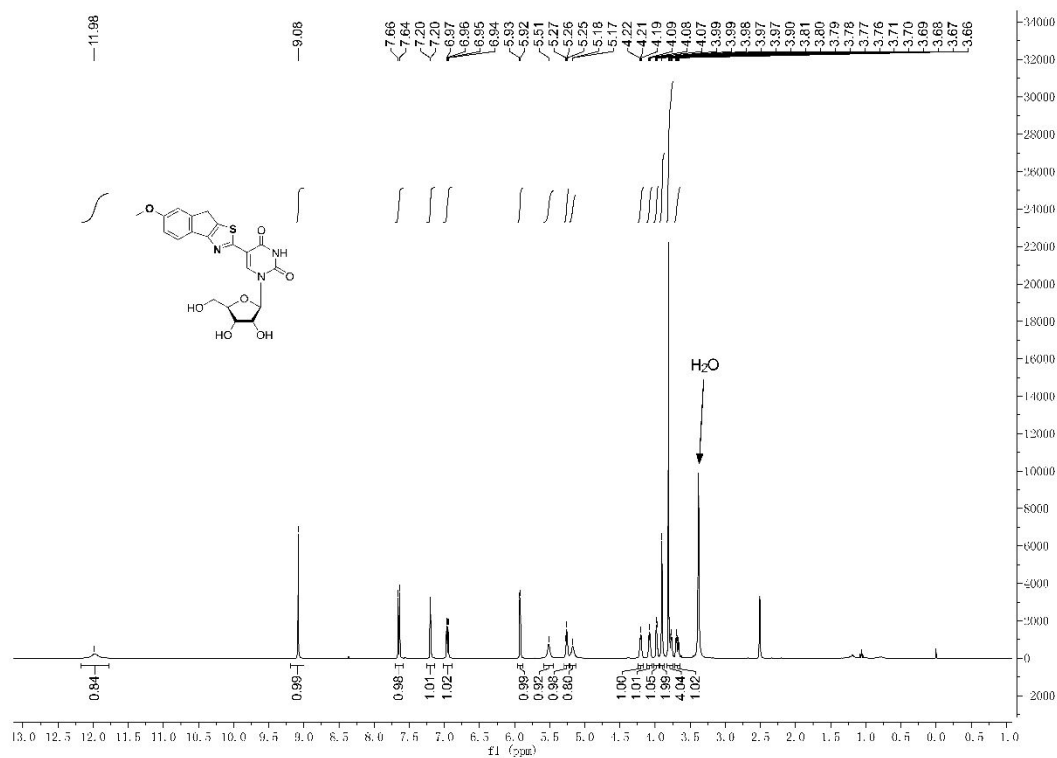

<sup>13</sup>C-NMR spectra of compound **7d**

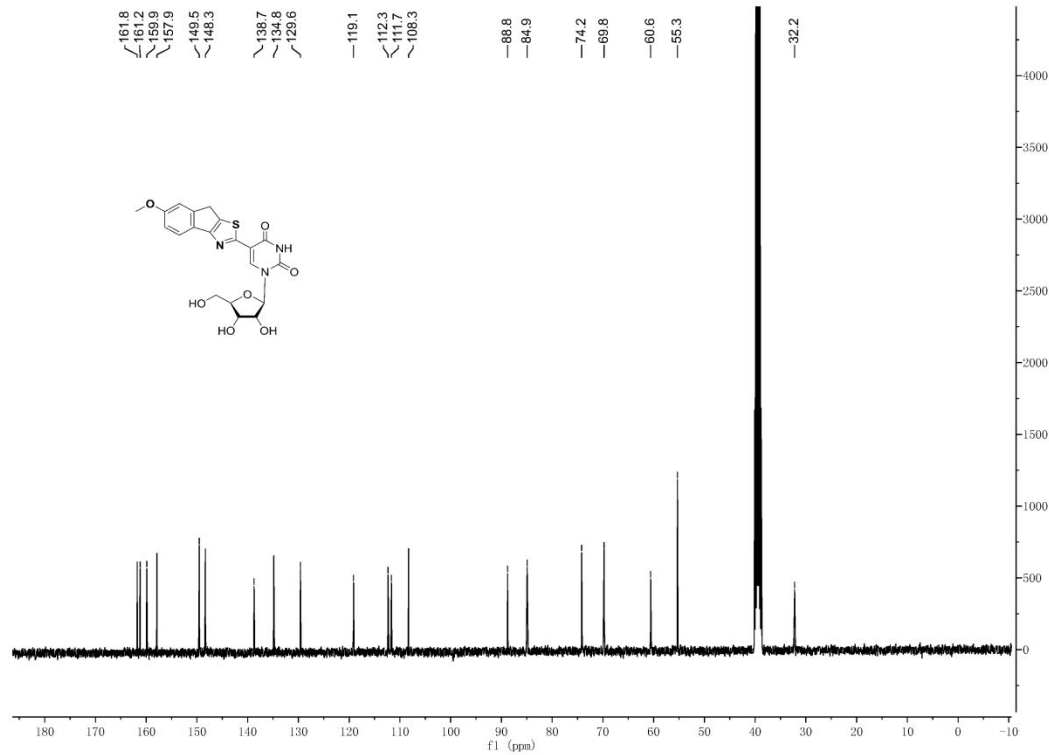

# LC-ESI-MS chromatograms of compound **7e**

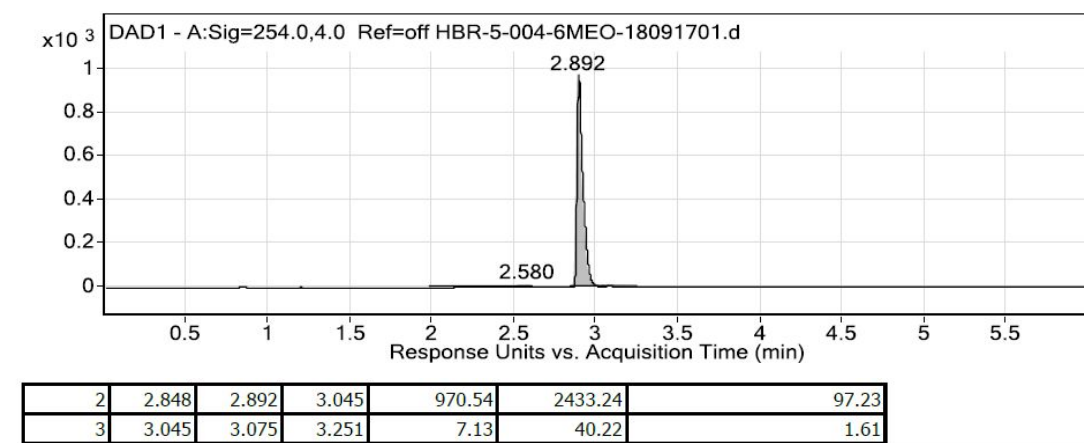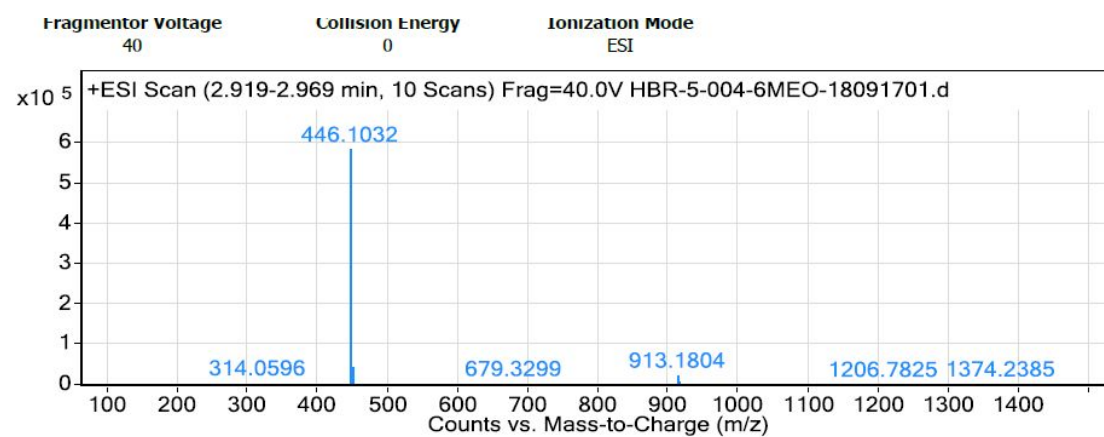

## <sup>1</sup>H-NMR spectra of compound **7e**

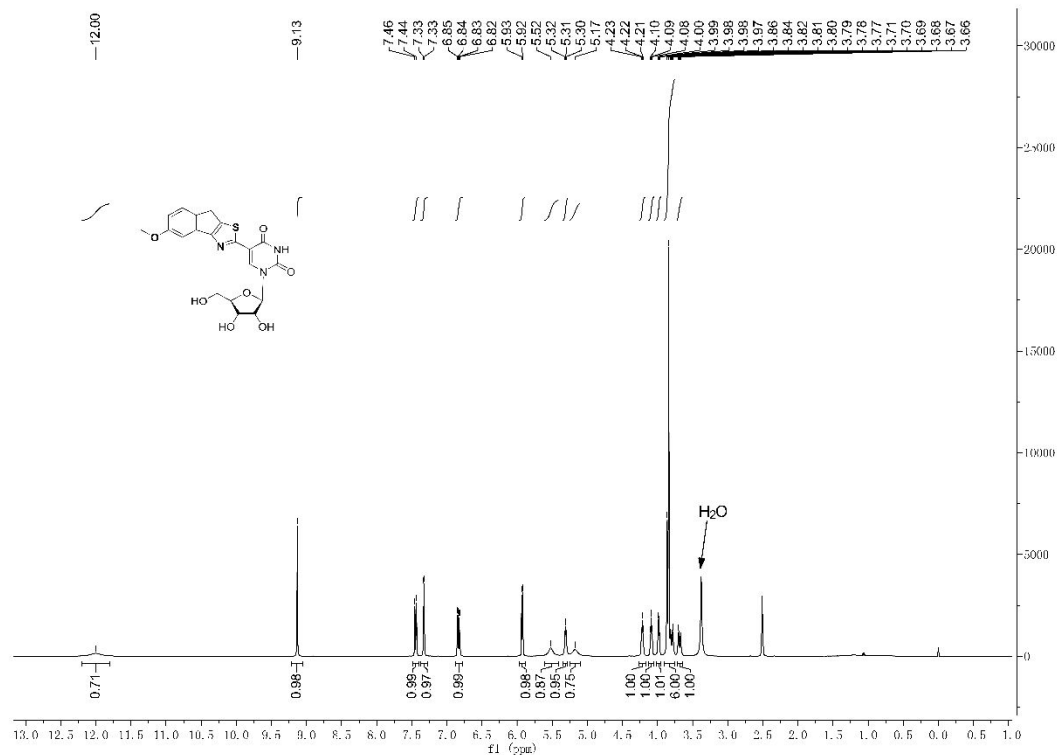

<sup>13</sup>C-NMR spectra of compound **7e**

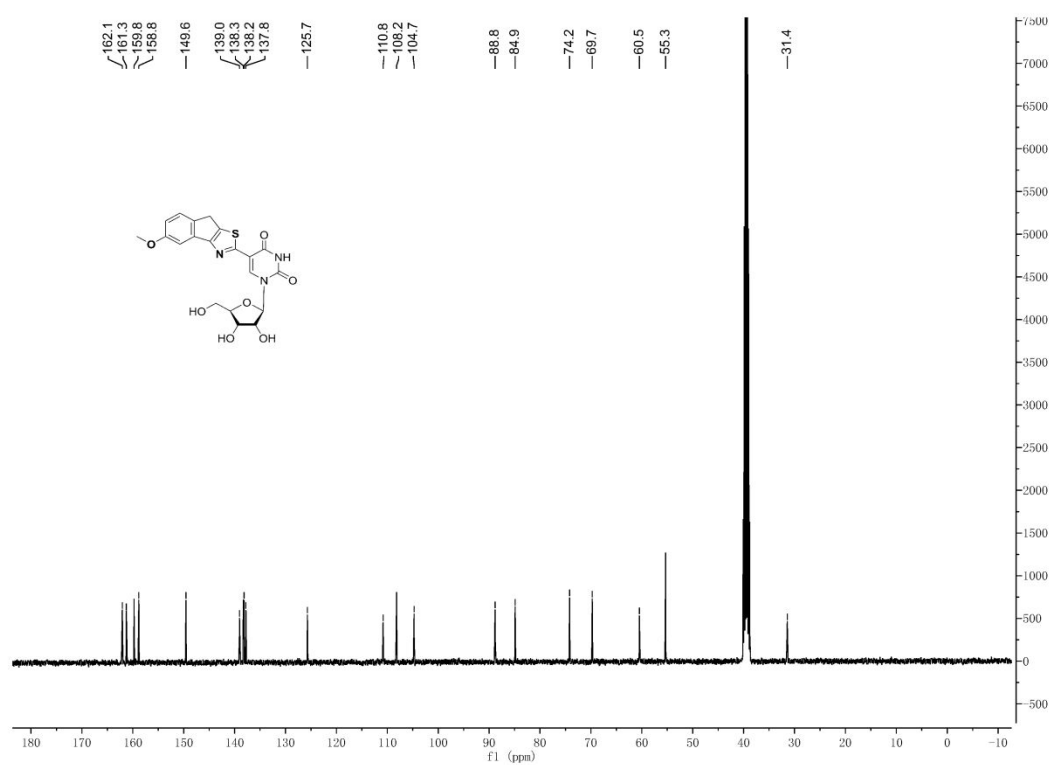

LC-ESI-MS chromatograms of compound **7f**

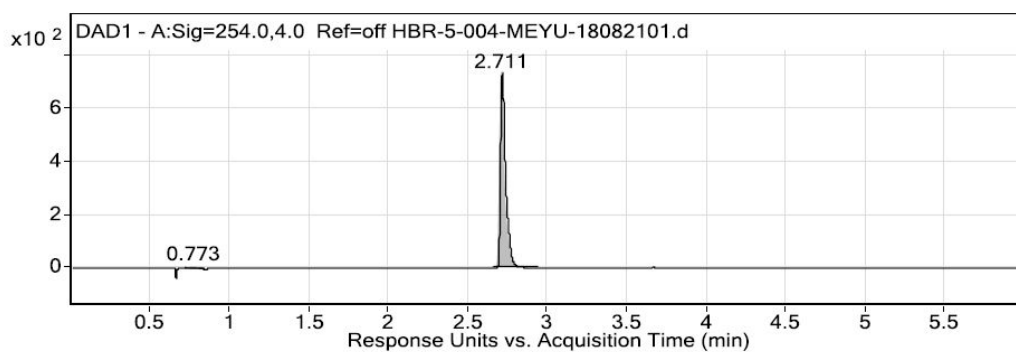

### Integration Peak List

| Peak | Start | RT    | End   | Height | Area    | AreaSumPercent |
|------|-------|-------|-------|--------|---------|----------------|
| 1    | 0.725 | 0.773 | 0.844 | 5.66   | 35.5    | 2.08           |
| 2    | 2.663 | 2.711 | 2.941 | 734.73 | 1673.32 | 97.92          |

### Fragmentor Voltage

### Collision Energy

### Ionization Mode

40

0

ESI

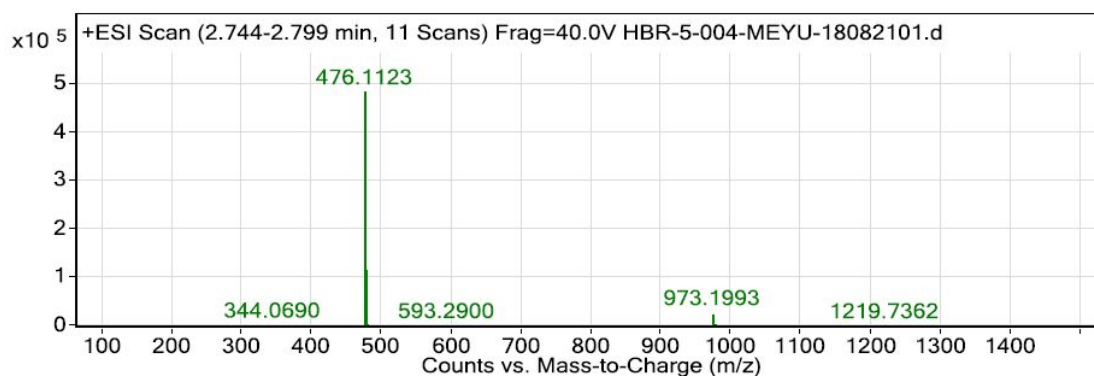<sup>1</sup>H-NMR spectra of compound **7f**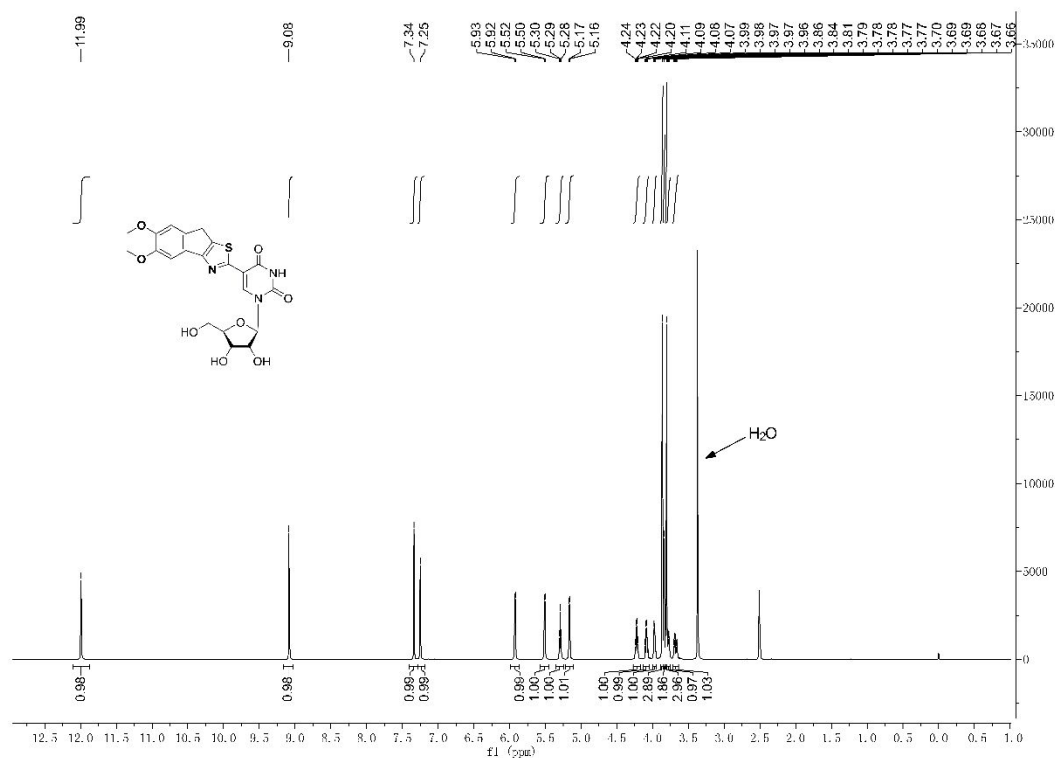

<sup>13</sup>C-NMR spectra of compound **7f**

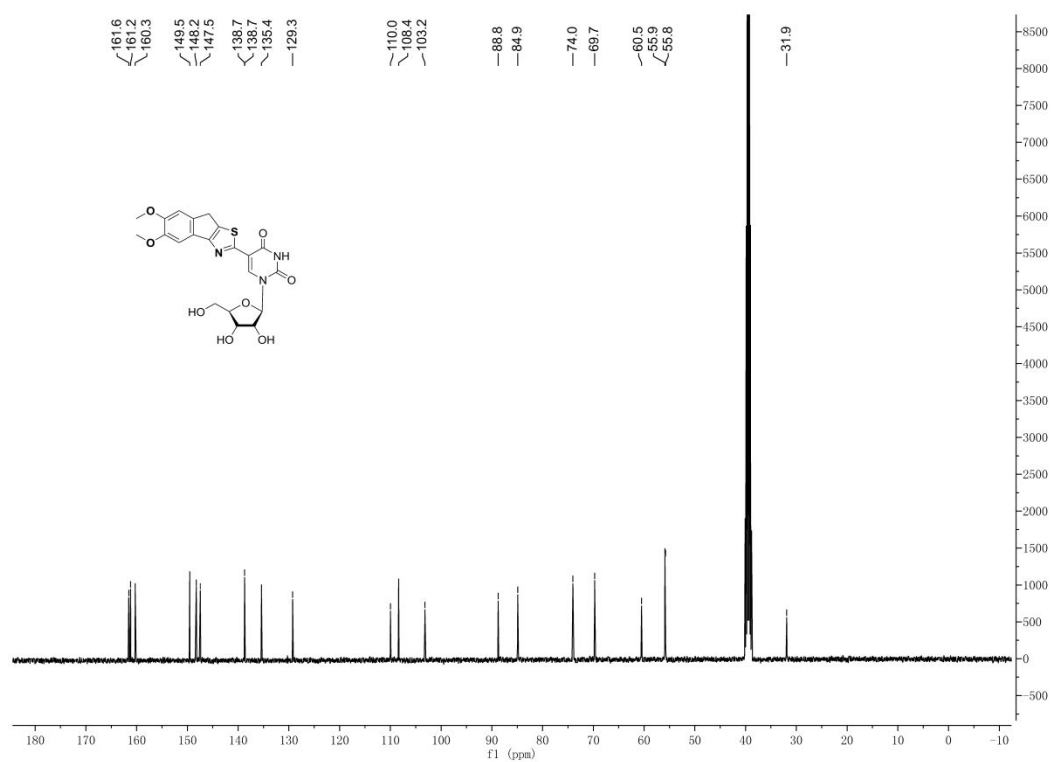



# LC-ESI-MS chromatograms of compound **7g**

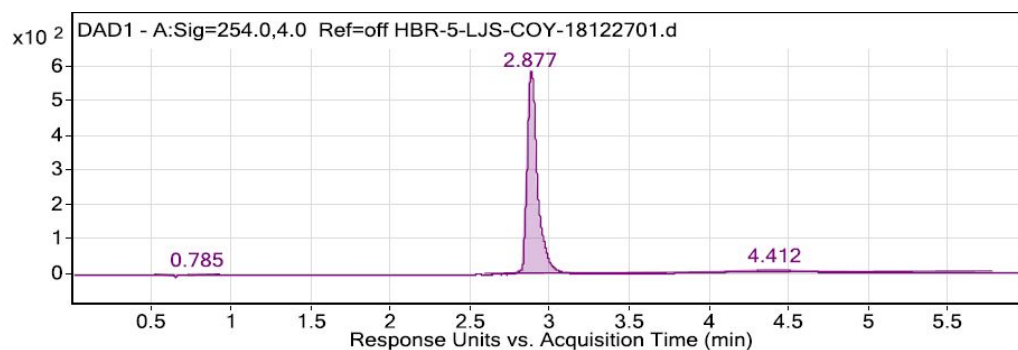

## Integration Peak List

| Peak | Start | RT    | End   | Height | Area    | AreaSumPercent |
|------|-------|-------|-------|--------|---------|----------------|
| 1    | 0.522 | 0.589 | 0.647 | 4.59   | 30.14   | 0.93           |
| 2    | 0.732 | 0.785 | 0.925 | 5.16   | 42.43   | 1.31           |
| 3    | 2.593 | 2.877 | 3.288 | 586.48 | 2726.87 | 84.46          |
| 4    | 3.288 | 4.412 | 5.778 | 9.42   | 429.32  | 13.30          |

Fragmentor Voltage 40 Collision Energy 0 Ionization Mode ESI

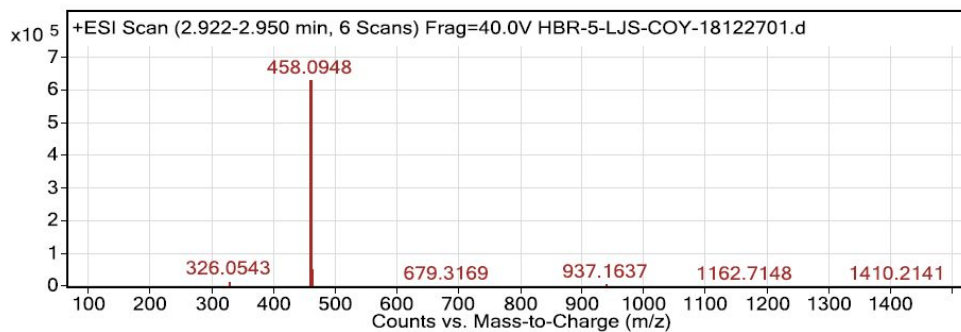

<sup>1</sup>H-NMR spectra of compound **7g**

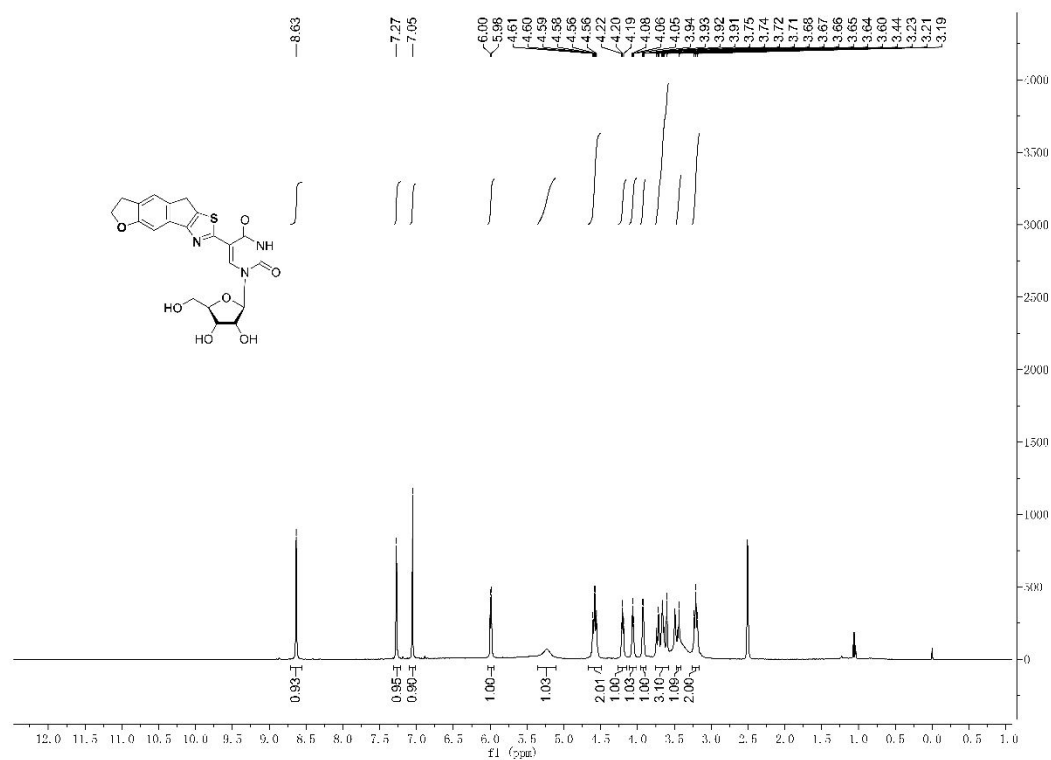

<sup>13</sup>C-NMR spectra of compound **7g**

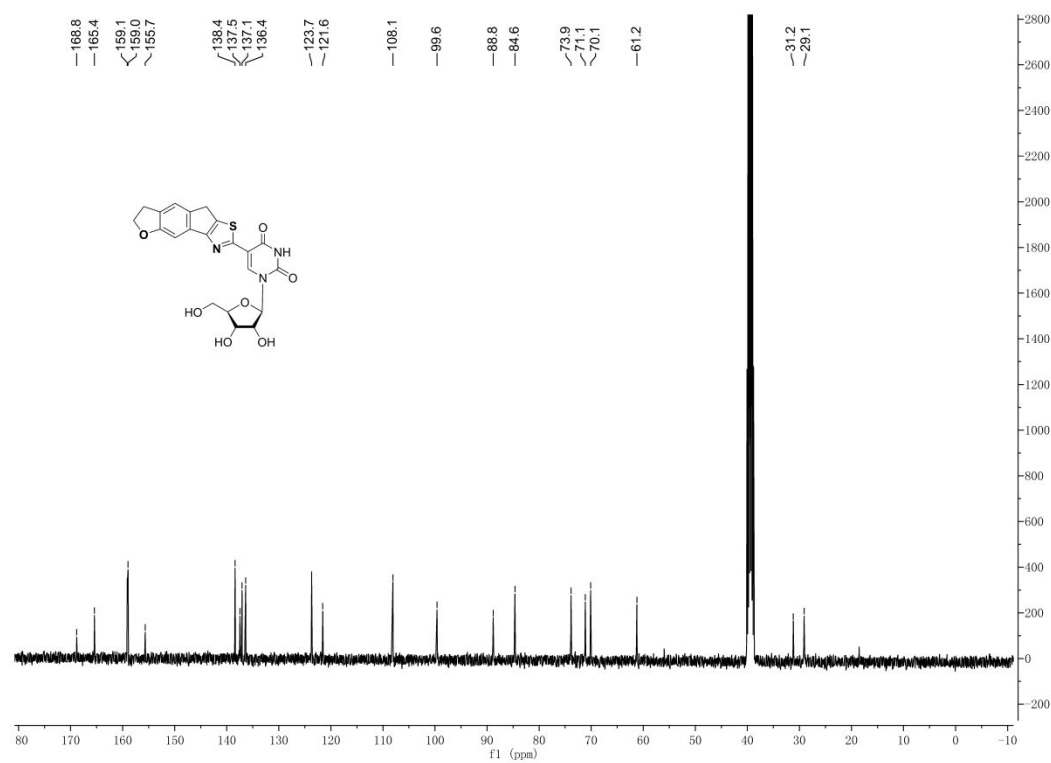

# LC-ESI-MS chromatograms of compound **7h**

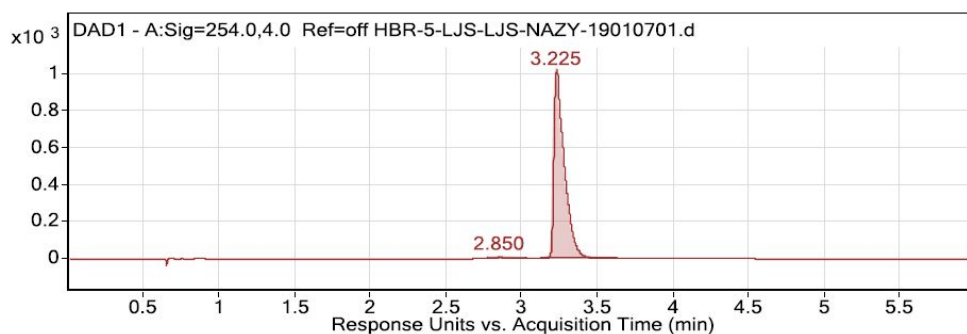

Integration Peak List

| Peak | Start | RT    | End   | Height  | Area    | AreaSumPercent |
|------|-------|-------|-------|---------|---------|----------------|
| 1    | 2.775 | 2.85  | 3.033 | 9.42    | 99.67   | 1.98           |
| 2    | 3.129 | 3.225 | 3.631 | 1028.02 | 4940.93 | 98.02          |

Fragmentor Voltage 40 Collision Energy 0 Ionization Mode ESI

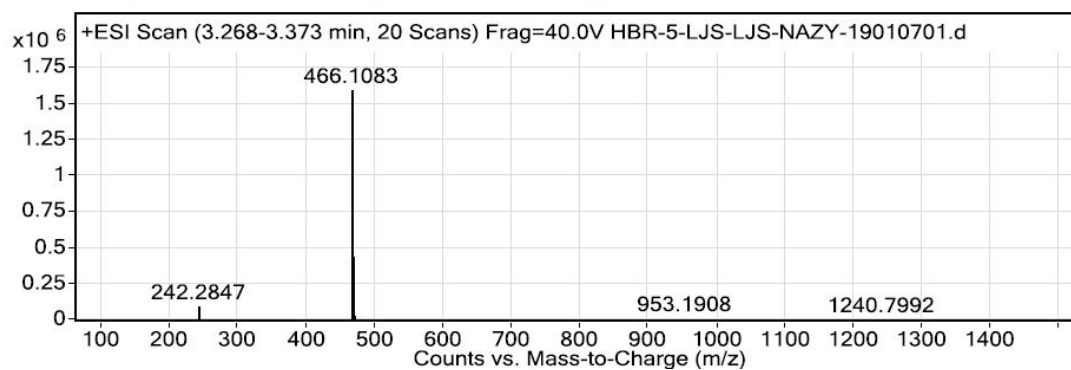

## <sup>1</sup>H-NMR spectra of compound **7h**

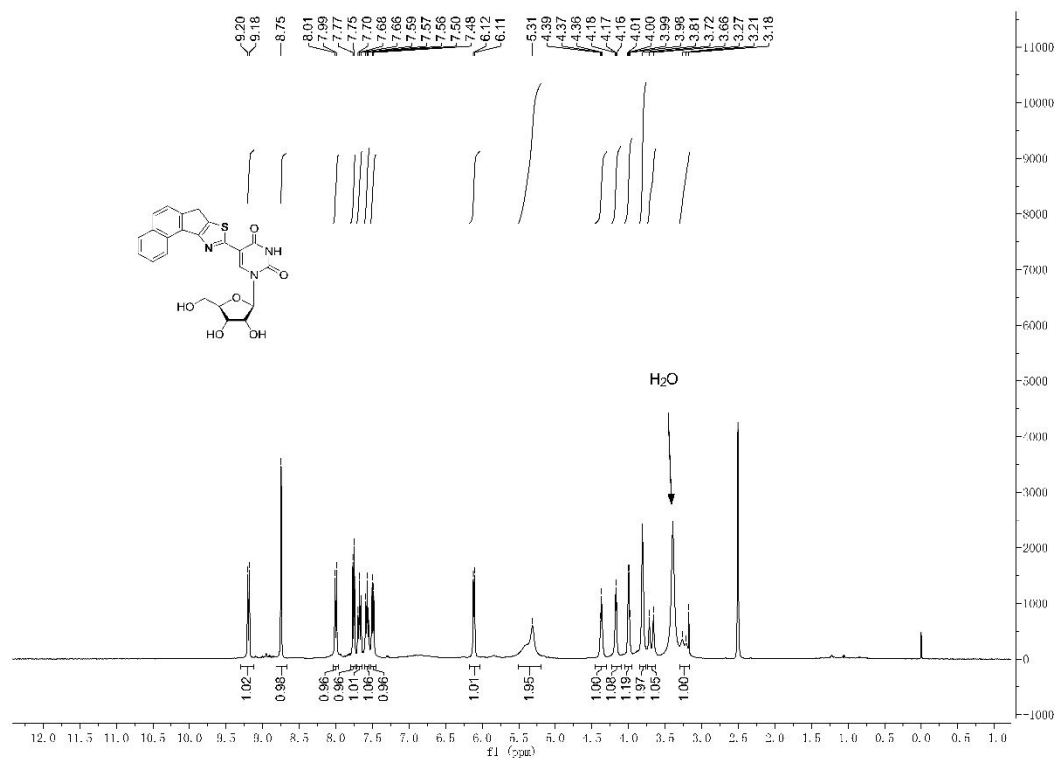

<sup>13</sup>C-NMR spectra of compound **7h**

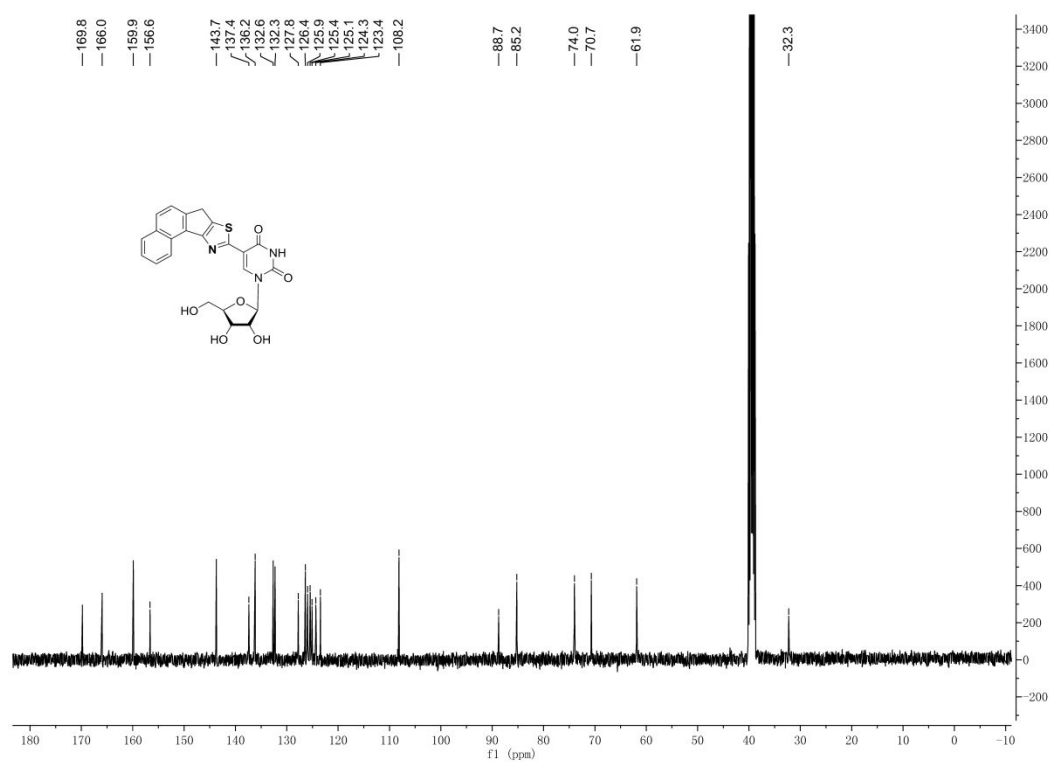

# LC-ESI-MS chromatograms of compound **7i**

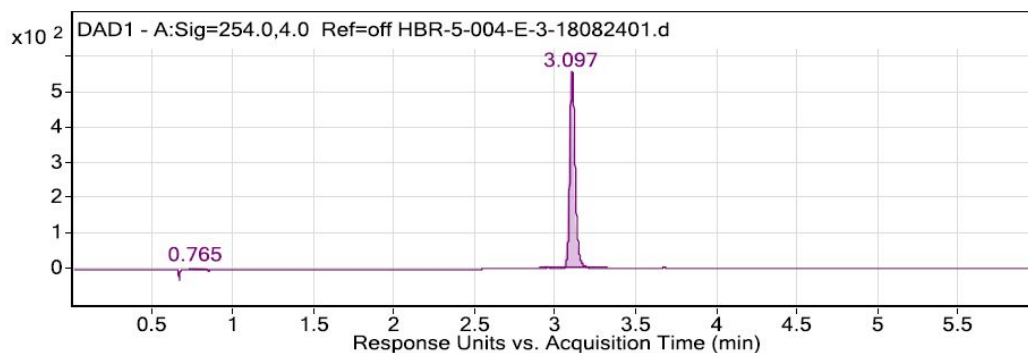

## Integration Peak List

| Peak | Start | RT    | End   | Height | Area    | AreaSumPercent |
|------|-------|-------|-------|--------|---------|----------------|
| 1    | 0.732 | 0.765 | 0.844 | 4.07   | 20.66   | 1.55           |
| 2    | 2.901 | 2.946 | 3.038 | 4.73   | 13.06   | 0.98           |
| 3    | 3.038 | 3.097 | 3.325 | 554.47 | 1295.39 | 97.46          |

Fragmentor Voltage  
40

Collision Energy  
0

Ionization Mode  
ESI

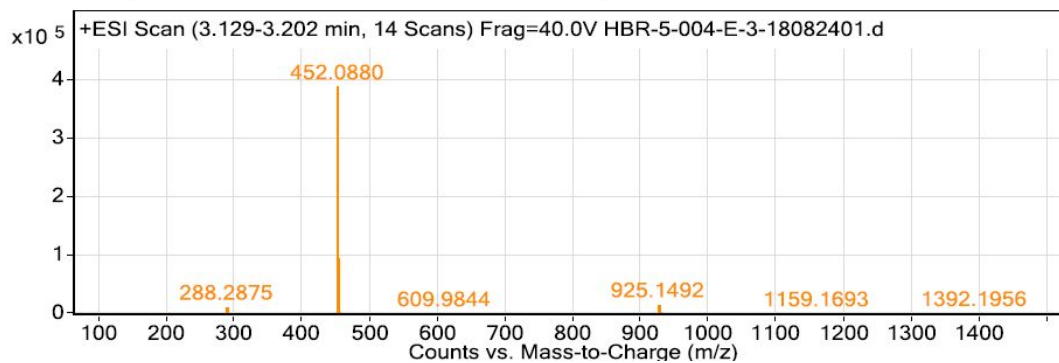

<sup>1</sup>H-NMR spectra of compound **7i**

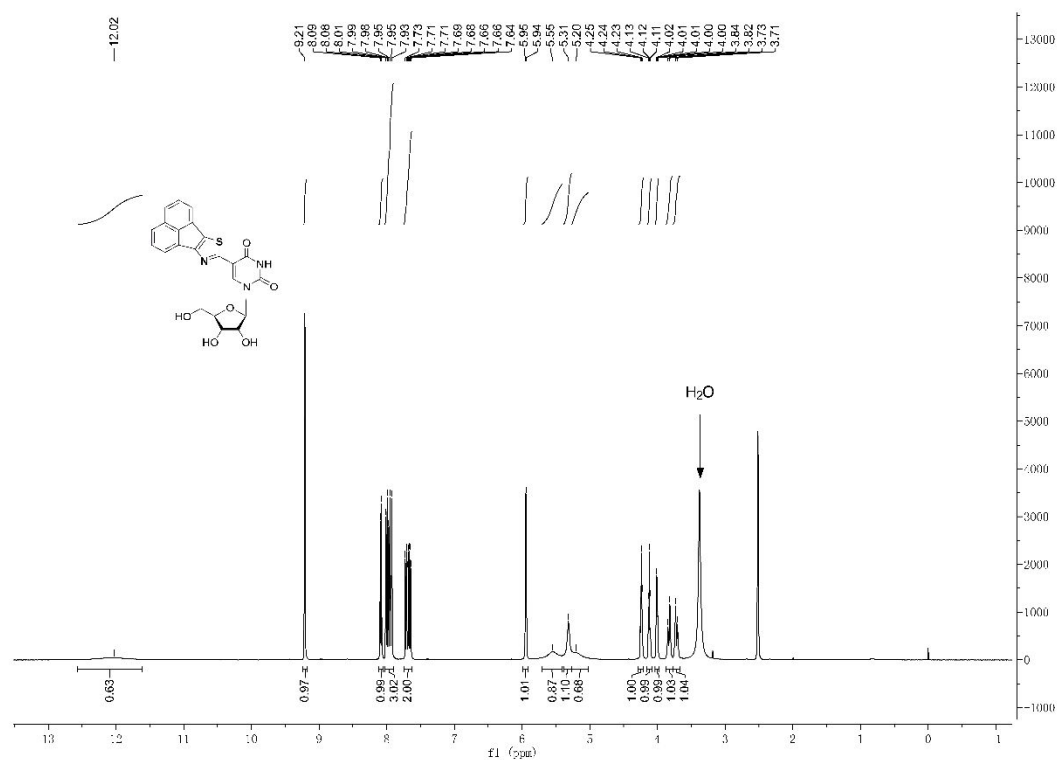

<sup>13</sup>C-NMR spectra of compound **7i**

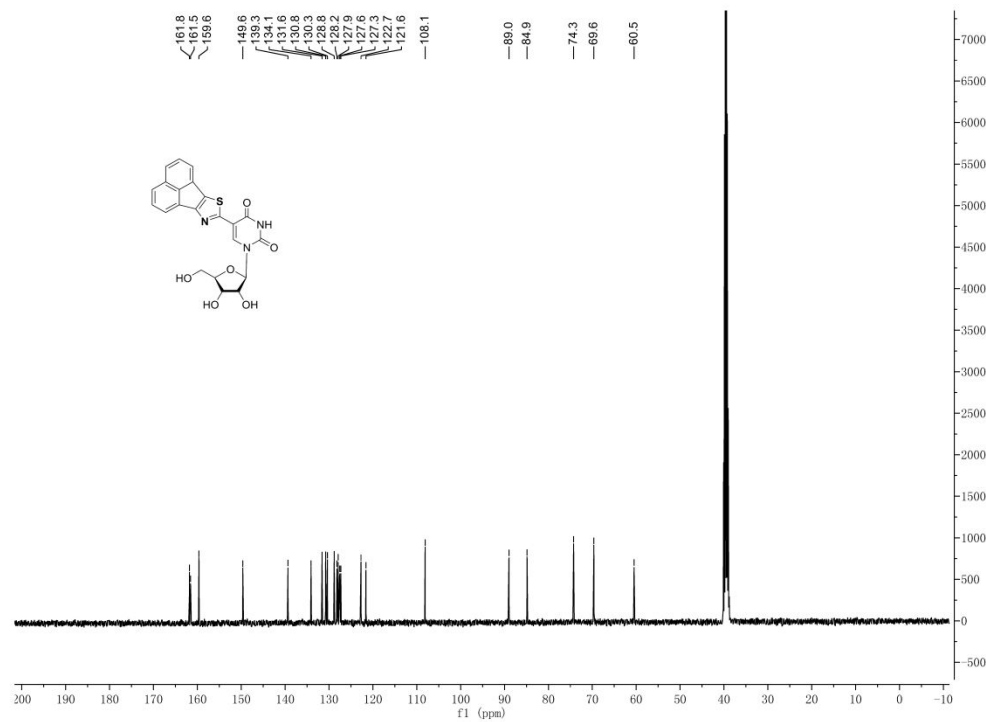

# LC-ESI-MS chromatograms of compound 7j

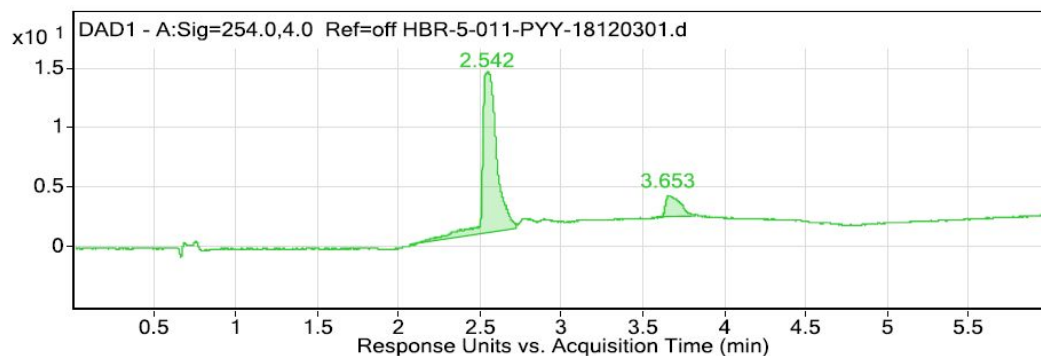

## Integration Peak List

| Peak | Start | RT    | End   | Height | Area  | AreaSumPercent |
|------|-------|-------|-------|--------|-------|----------------|
| 1    | 2.071 | 2.542 | 2.721 | 13.67  | 89.95 | 88.00          |
| 2    | 3.586 | 3.653 | 3.821 | 1.87   | 12.26 | 12.00          |

Spectrum Source  
Peak (11) in "+ TIC Scan"

Fragmentor Voltage  
40

Collision Energy  
0

Ionization Mode  
ESI

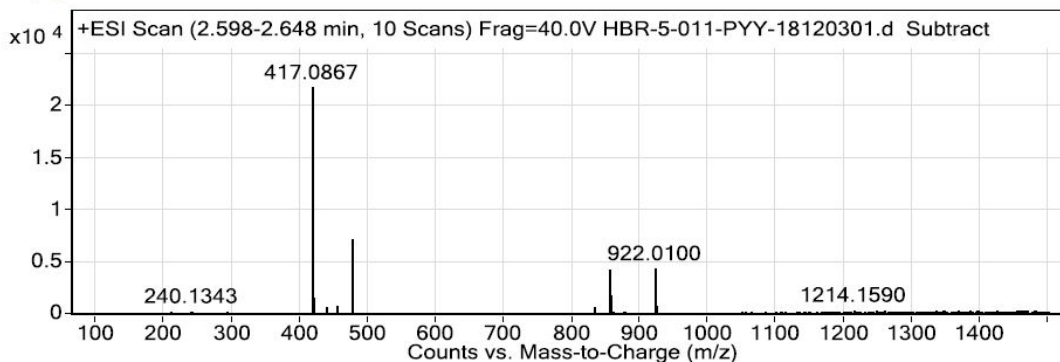

# H-NMR spectra of compound **7j**

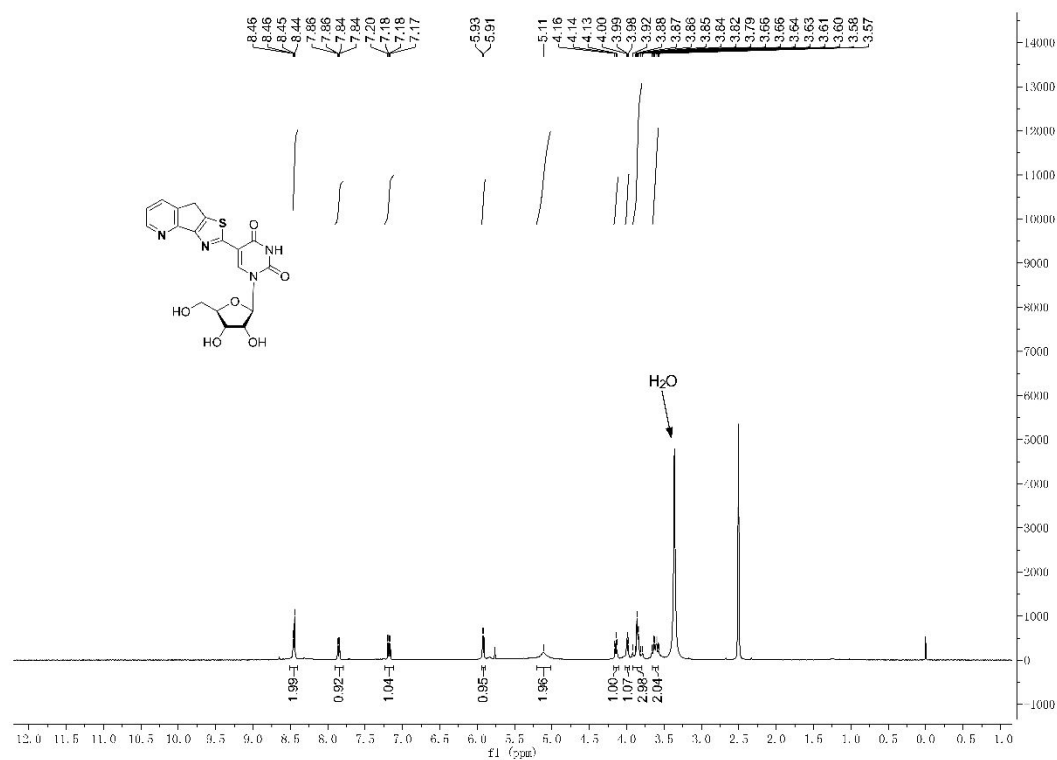

# <sup>13</sup>C-NMR spectra of compound **7j**

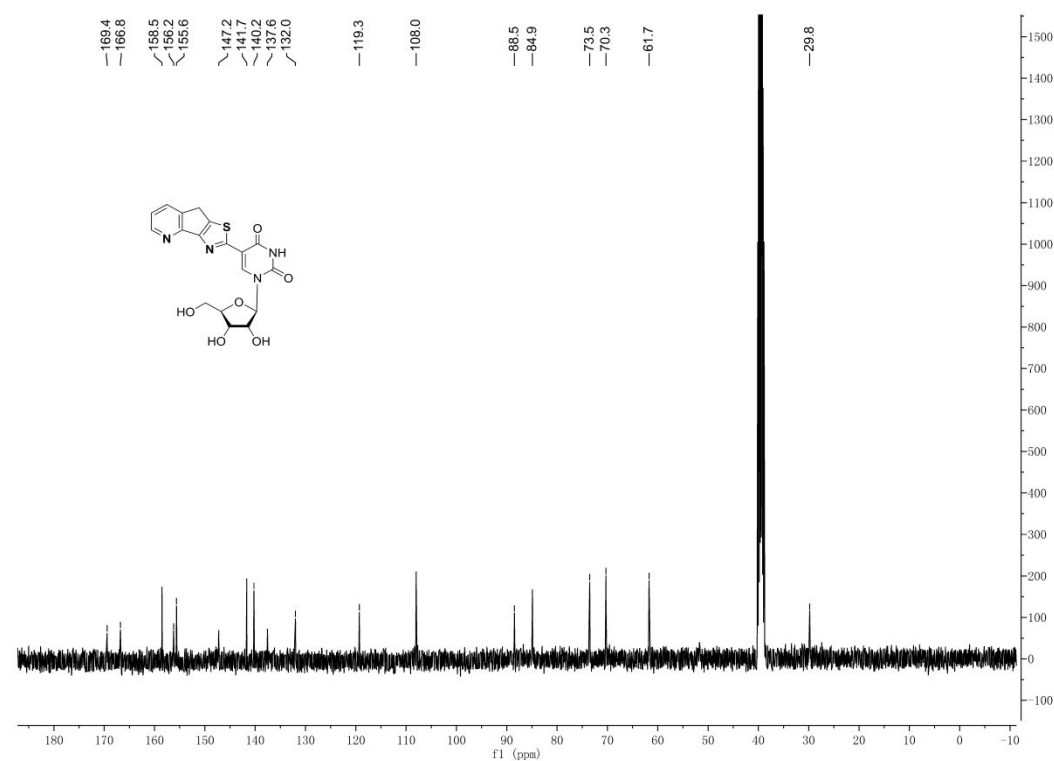



# LC-ESI-MS chromatograms of compound **7k**

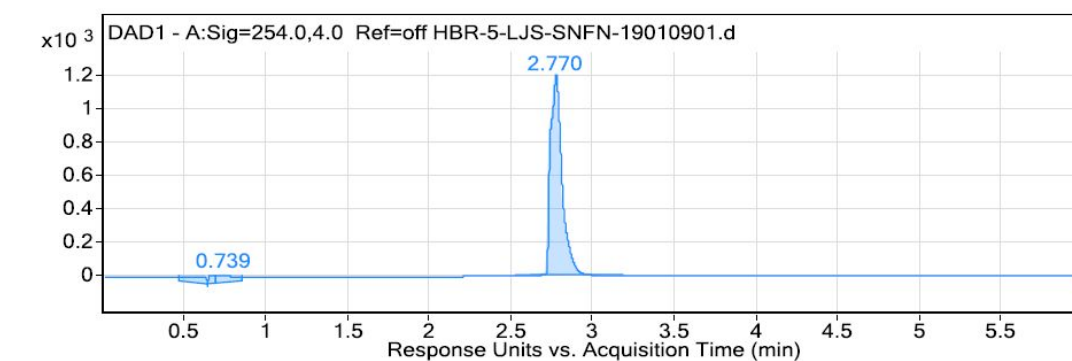

Integration Peak List

| Peak | Start | RT    | End   | Height | Area    | AreaSumPercent |
|------|-------|-------|-------|--------|---------|----------------|
| 1    | 0.468 | 0.579 | 0.638 | 47.7   | 441.07  | 6.27           |
| 2    | 0.638 | 0.658 | 0.693 | 53.91  | 160.85  | 2.29           |
| 3    | 0.693 | 0.739 | 0.855 | 49.36  | 421.19  | 5.99           |
| 4    | 2.529 | 2.77  | 3.188 | 1204.1 | 6010.14 | 85.45          |

Fragmentor Voltage  
40

Collision Energy  
0

Ionization Mode  
ESI

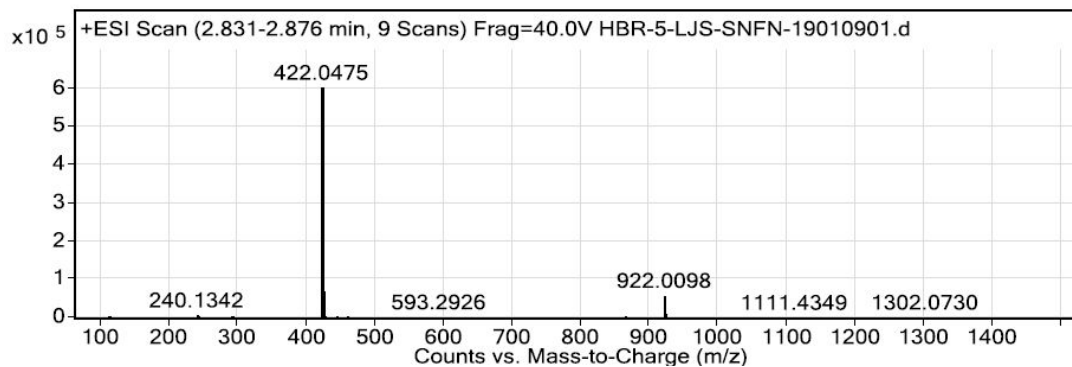

<sup>1</sup>H-NMR spectra of compound **7k**

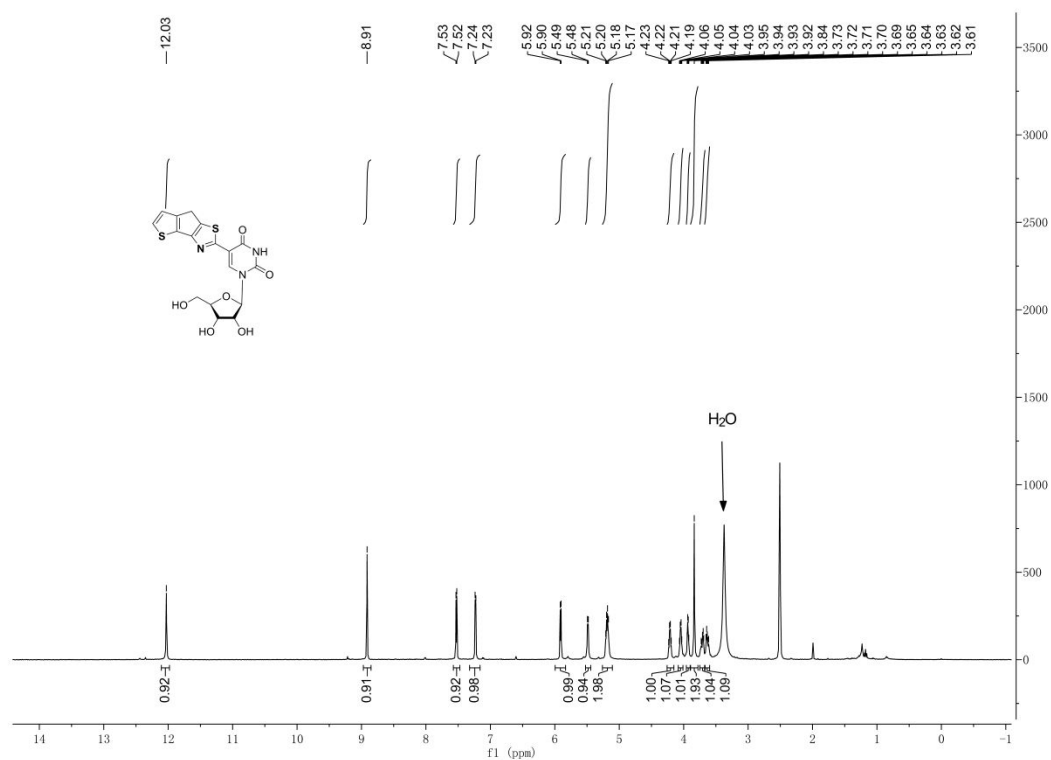

<sup>13</sup>C-NMR spectra of compound **7k**

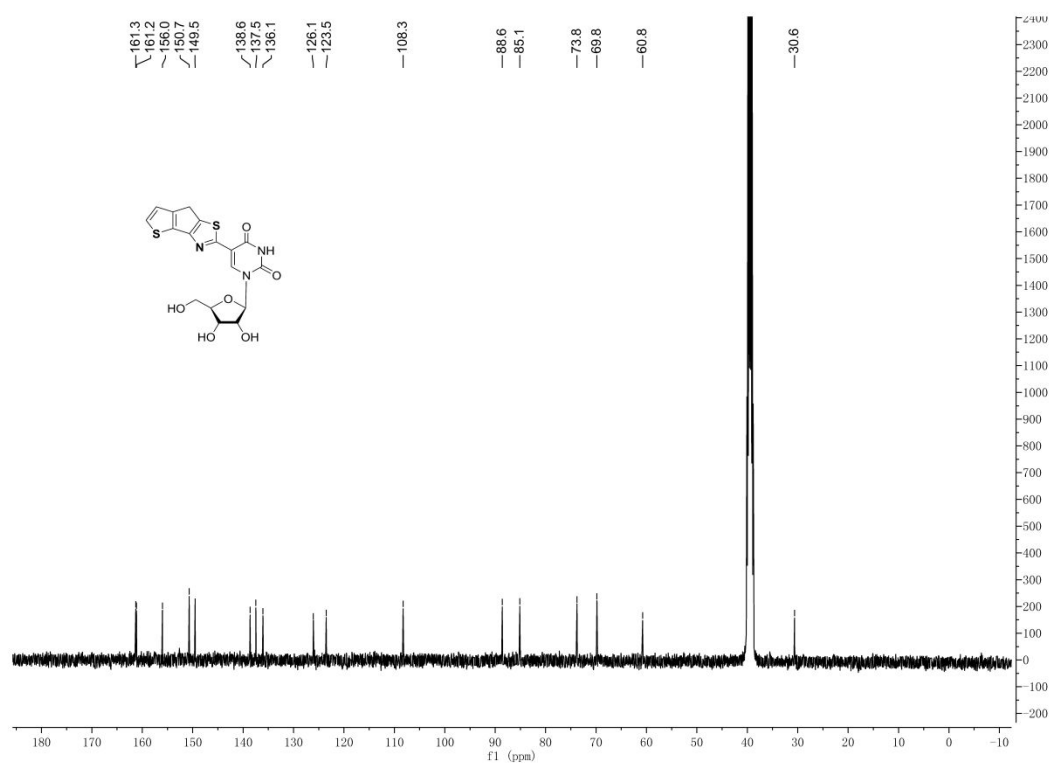

# LC-ESI-MS chromatograms of compound 71

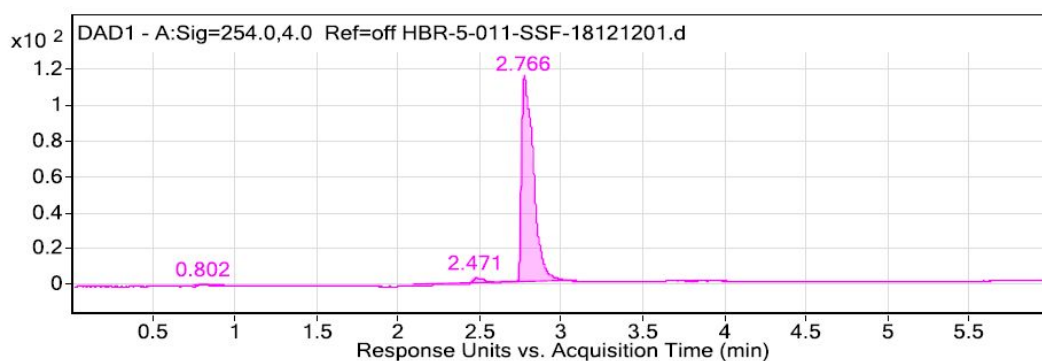

Integration Peak List

| Peak | Start | RT    | End   | Height | Area   | AreaSumPercent |
|------|-------|-------|-------|--------|--------|----------------|
| 1    | 0.745 | 0.802 | 0.931 | 1.07   | 6.43   | 1.03           |
| 2    | 2.091 | 2.471 | 2.582 | 3.44   | 21.83  | 3.49           |
| 3    | 2.582 | 2.766 | 3.091 | 115.31 | 596.73 | 95.48          |

Fragmentor Voltage 40 Collision Energy 0 Ionization Mode ESI

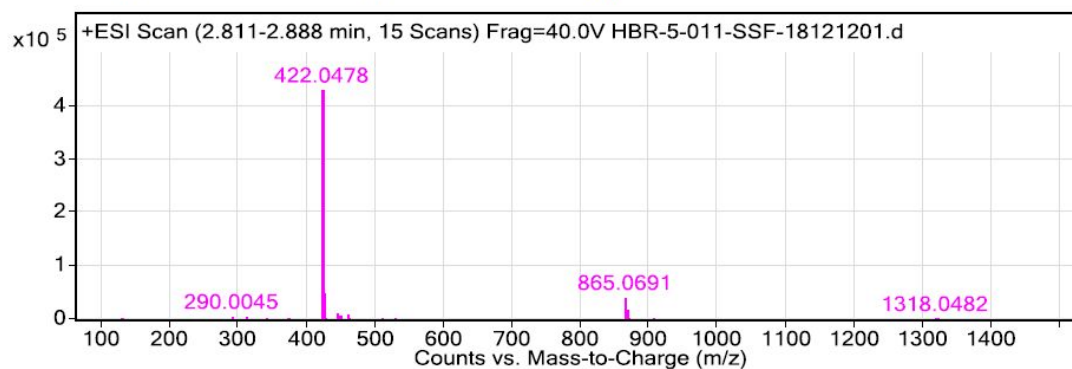

<sup>1</sup>H-NMR spectra of compound **7I**

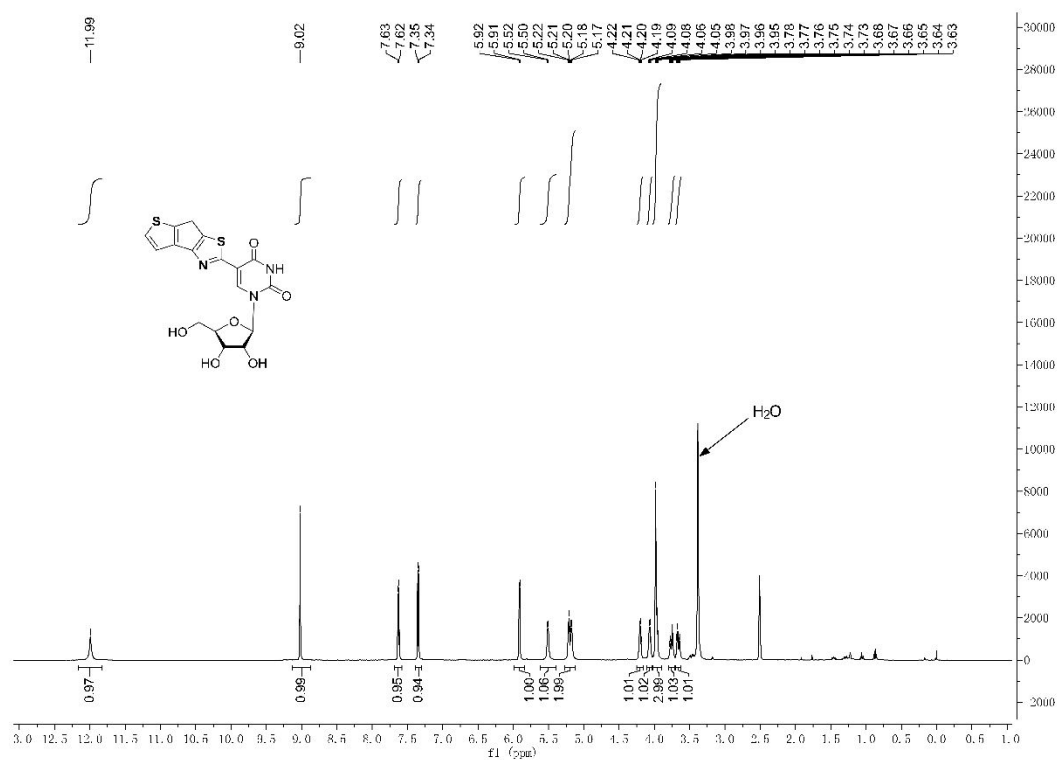

<sup>13</sup>C-NMR spectra of compound **7I**

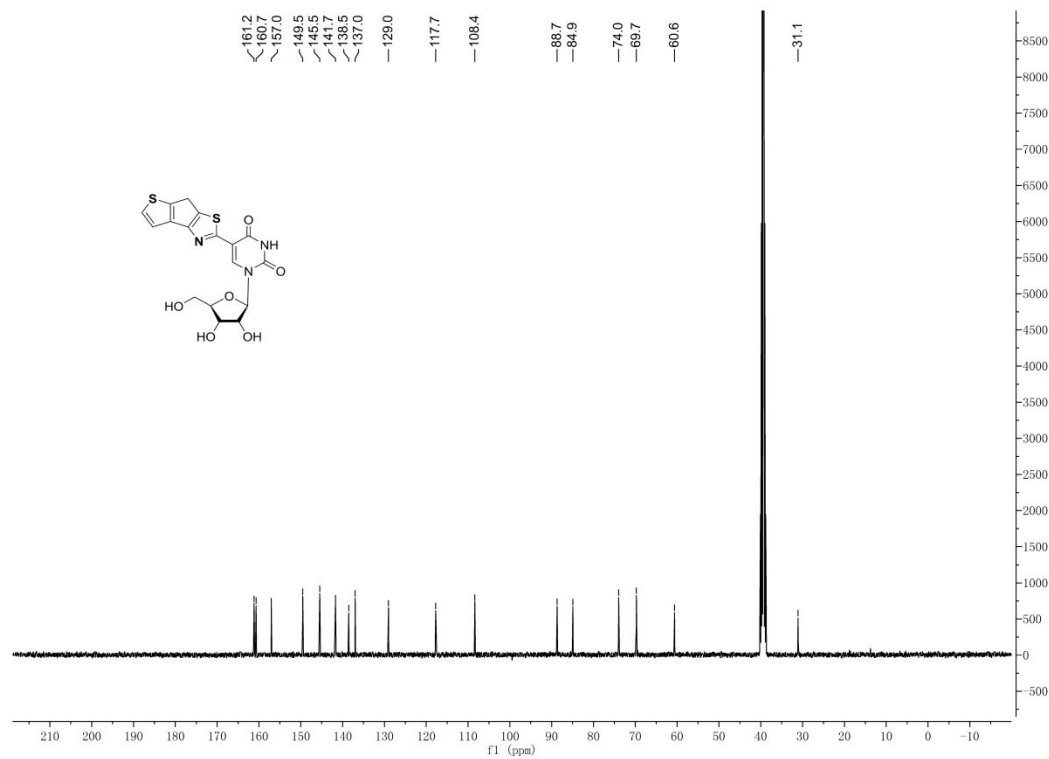

# LC-ESI-MS chromatograms of compound **7m**

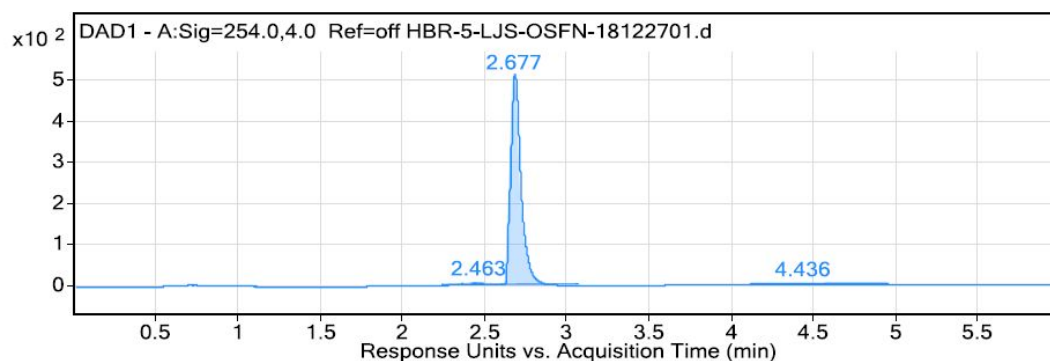

## Integration Peak List

| Peak | Start | RT    | End   | Height | Area    | AreaSumPercent |
|------|-------|-------|-------|--------|---------|----------------|
| 1    | 2.242 | 2.354 | 2.366 | 3.91   | 22.81   | 0.96           |
| 2    | 2.366 | 2.426 | 2.442 | 5.86   | 22.75   | 0.95           |
| 3    | 2.442 | 2.463 | 2.607 | 5.87   | 39.97   | 1.68           |
| 4    | 2.607 | 2.677 | 3.071 | 515.86 | 2262.35 | 94.89          |

Fragmentor voltage  
40

Collision Energy  
0

Ionization Mode  
ESI

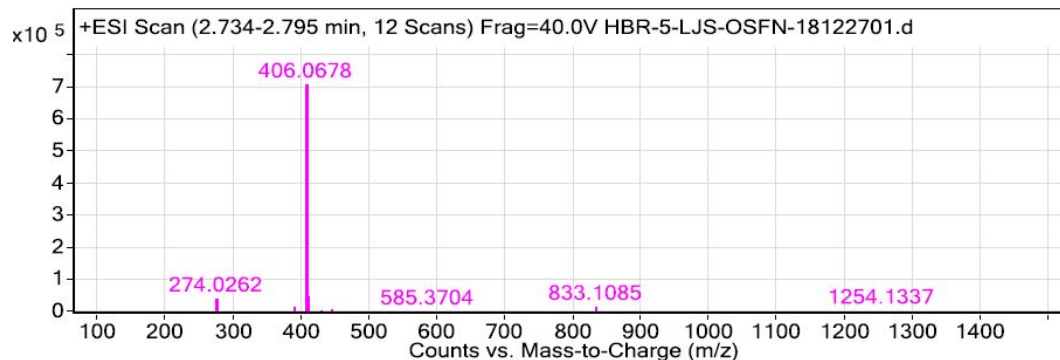

<sup>1</sup>H-NMR spectra of compound **7m**

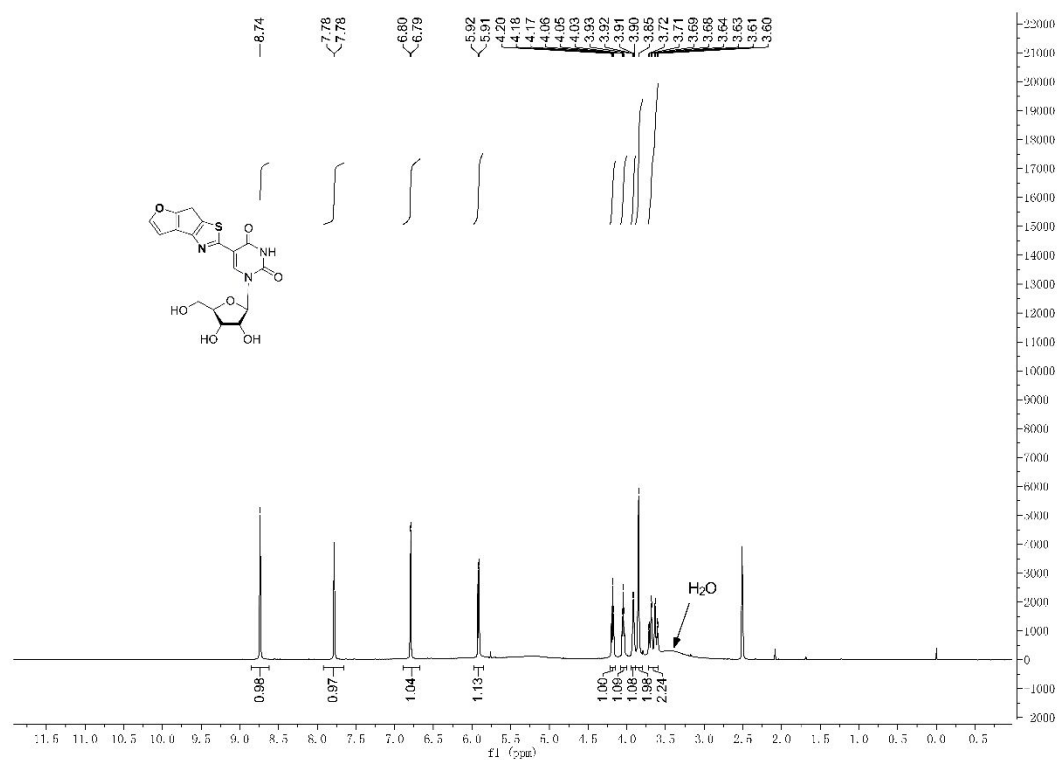

<sup>13</sup>C-NMR spectra of compound **7m**

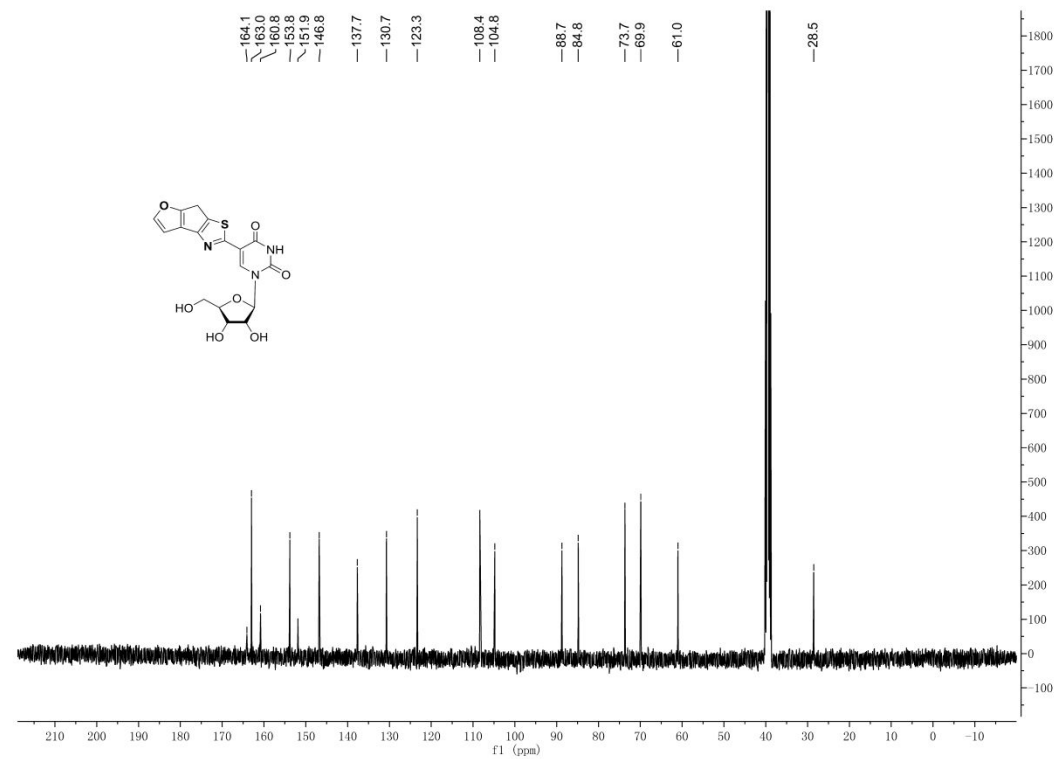

Supplement: Supplementary file 1 [file 22057788]
